# Supplementary material for: Oxidative α,ω-diyne coupling as an approach towards novel peptidic macrocycles
Source: Royal Society of Chemistry journal article supplement (doi:10.1039/c5ob01153a), 2015-01-01
Supplement: c5ob01153a1.pdf [file c5ob01153a1.pdf]

## Supporting information for

# Oxidative $\alpha,\omega$ -diyne coupling as an approach towards novel peptidic macrocycles

**Steven Verlinden,<sup>a</sup> Niels Geudens,<sup>b</sup> José C. Martins,<sup>b</sup> Dirk Tourwé,<sup>a</sup> Steven Ballet,<sup>a</sup> and Guido Verniest<sup>\*a</sup>**

<sup>a</sup>Research Group of Organic Chemistry, Department of Chemistry and Department of Bio-engineering Sciences, Faculty of Science and Bio-engineering Sciences, Vrije Universiteit Brussel (VUB), Pleinlaan 2, 1050 Brussels, Belgium; <sup>b</sup> NMR and Structure Analysis, Department of Organic Chemistry, Ghent University, Krijgslaan 281-S4, 9000 Ghent, Belgium

|                                                                                                                                                                                                                                                           |    |
|-----------------------------------------------------------------------------------------------------------------------------------------------------------------------------------------------------------------------------------------------------------|----|
| 1. Model study.....                                                                                                                                                                                                                                       | 2  |
| 2. Synthesis of Fmoc-AA( <i>O</i> -propargyl)-OH <b>18</b> and <b>20</b> .....                                                                                                                                                                            | 5  |
| 3. Solution phase synthesis of peptides <b>13b-c</b> , <b>14b-c</b> and <b>15b-c</b> .....                                                                                                                                                                | 8  |
| 4. Solid Phase Peptide Synthesis of <b>5a-k</b> , <b>7</b> and <b>9</b> .....                                                                                                                                                                             | 16 |
| 5. Cyclization and purification of peptides <b>5a-k</b> , <b>7</b> and <b>9</b> .....                                                                                                                                                                     | 17 |
| 6. Copies of <sup>1</sup> H and <sup>13</sup> C NMR of compounds <b>1</b> , <b>2</b> , <b>12</b> , <b>13a</b> , <b>14a</b> , <b>15a</b> , <b>17</b> , <b>18</b> , <b>20-24</b> and<br>ROESY NMR of compounds <b>13a</b> , <b>14a</b> and <b>15a</b> ..... | 22 |
| 7. Copies of HPLC chromatograms of purified peptides <b>5a-k</b> , <b>7</b> and <b>9</b> and crude reaction<br>mixtures of peptides <b>6a-k</b> , <b>8</b> and <b>10</b> .....                                                                            | 43 |
| 8. References.....                                                                                                                                                                                                                                        | 69 |

## 1. Model study

A model study to evaluate the optimal reaction conditions for the intermolecular dimerisation of alkynylated amino acids **1a** and **1b** was performed (Table 1). The general reaction procedure consisted of adding the solvent (0.5ml) to a mixture of **1a** (0.08mmol) or **1b** (0.08mmol) with a Cu-catalyst (0.5 equiv.) and/or Ni-catalyst (0.5 equiv.). The reaction mixture was stirred at rt and the base (3 equiv.), ligand (5 equiv.) and oxidant were added. In case of O<sub>2</sub> as oxidant, the reaction mixture was stirred under O<sub>2</sub>-atmosphere using a O<sub>2</sub>-balloon. In case of MnO<sub>2</sub>, pyridine *N*-oxide or H<sub>2</sub>O<sub>2</sub> (35 wt-% in H<sub>2</sub>O) as oxidants, these reagents were added in excess (5 equiv.) to the reaction mixture and stirred open to the atmosphere, but using a plug of cotton wool to prevent excessive loss of solvents in case of long reaction times. Also in case of air as oxidant, the reaction mixture was stirred open to the atmosphere as described above. The reaction temperature was increased to 60°C when no or slow conversion towards the corresponding diyne was observed. Conversions were determined via HPLC by direct sampling of the reaction mixture.

| AA        | Cu-cat.                                               | Ni-cat.                                              | Base                    | Ligand                 | Solvent                                           | oxidant                           | t (h) | T       | Conv. (%) |
|-----------|-------------------------------------------------------|------------------------------------------------------|-------------------------|------------------------|---------------------------------------------------|-----------------------------------|-------|---------|-----------|
| <b>1b</b> | Cu(OAc) <sub>2</sub> .H <sub>2</sub> O                | /                                                    | Et <sub>3</sub> N       | pyridine               | EtOH                                              | O <sub>2</sub>                    | 5     | rt      | >99       |
| <b>1b</b> | Cu(OAc) <sub>2</sub> .H <sub>2</sub> O                | NiCl <sub>2</sub>                                    | Et <sub>3</sub> N       | pyridine               | EtOH                                              | O <sub>2</sub>                    | 4     | rt      | >99       |
| <b>1a</b> | Cu(OAc) <sub>2</sub> .H <sub>2</sub> O                | /                                                    | Et <sub>3</sub> N       | pyridine               | EtOH                                              | O <sub>2</sub>                    | 120   | rt      | 50        |
| <b>1a</b> | Cu(OAc) <sub>2</sub> .H <sub>2</sub> O                | NiCl <sub>2</sub>                                    | Et <sub>3</sub> N       | pyridine               | EtOH                                              | O <sub>2</sub>                    | 120   | rt-60°C | 60        |
| <b>1b</b> | <b>Cu(OAc)<sub>2</sub>.H<sub>2</sub>O</b>             | /                                                    | Et <sub>3</sub> N       | pyridine               | EtOH                                              | O <sub>2</sub>                    | 5     | rt      | >99       |
| <b>1b</b> | <b>CuSO<sub>4</sub>.5H<sub>2</sub>O</b>               | /                                                    | Et <sub>3</sub> N       | pyridine               | EtOH                                              | O <sub>2</sub>                    | 96    | rt      | 90        |
| <b>1b</b> | <b>CuI</b>                                            | /                                                    | Et <sub>3</sub> N       | pyridine               | EtOH                                              | O <sub>2</sub>                    | 144   | rt      | 93        |
| <b>1b</b> | <b>Cu(CH<sub>3</sub>CN)<sub>4</sub>PF<sub>6</sub></b> | /                                                    | Et <sub>3</sub> N       | pyridine               | EtOH                                              | O <sub>2</sub>                    | 24    | rt      | >99       |
| <b>1b</b> | Cu(OAc) <sub>2</sub> .H <sub>2</sub> O                | <b>NiCl<sub>2</sub>.6H<sub>2</sub>O</b>              | Et <sub>3</sub> N       | pyridine               | EtOH                                              | O <sub>2</sub>                    | 168   | rt      | 95        |
| <b>1b</b> | Cu(OAc) <sub>2</sub> .H <sub>2</sub> O                | <b>NiCl<sub>2</sub>(acac)<sub>2</sub></b>            | Et <sub>3</sub> N       | pyridine               | EtOH                                              | O <sub>2</sub>                    | 168   | rt      | 93        |
| <b>1b</b> | Cu(OAc) <sub>2</sub> .H <sub>2</sub> O                | <b>NiCl<sub>2</sub>(PPh<sub>3</sub>)<sub>2</sub></b> | Et <sub>3</sub> N       | pyridine               | EtOH                                              | O <sub>2</sub>                    | 168   | rt      | 5         |
| <b>1b</b> | Cu(OAc) <sub>2</sub> .H <sub>2</sub> O                | NiCl <sub>2</sub>                                    | <b>Et<sub>2</sub>NH</b> | pyridine               | EtOH                                              | O <sub>2</sub>                    | 24    | rt      | 95        |
| <b>1b</b> | Cu(OAc) <sub>2</sub> .H <sub>2</sub> O                | NiCl <sub>2</sub>                                    | <b>DIPEA</b>            | pyridine               | EtOH                                              | O <sub>2</sub>                    | 24    | rt      | 97        |
| <b>1b</b> | Cu(OAc) <sub>2</sub> .H <sub>2</sub> O                | NiCl <sub>2</sub>                                    | <b>TMEDA</b>            | pyridine               | EtOH                                              | O <sub>2</sub>                    | 168   | rt      | 87        |
| <b>1b</b> | Cu(OAc) <sub>2</sub> .H <sub>2</sub> O                | NiCl <sub>2</sub>                                    | <b>DBU</b>              | pyridine               | EtOH                                              | O <sub>2</sub>                    | 24    | rt      | >99       |
| <b>1b</b> | Cu(OAc) <sub>2</sub> .H <sub>2</sub> O                | NiCl <sub>2</sub>                                    | Et <sub>3</sub> N       | <b>4-Me piperidine</b> | EtOH                                              | O <sub>2</sub>                    | 4     | rt      | 90        |
| <b>1b</b> | Cu(OAc) <sub>2</sub> .H <sub>2</sub> O                | NiCl <sub>2</sub>                                    | Et <sub>3</sub> N       | <b>pyrrolidine</b>     | EtOH                                              | O <sub>2</sub>                    | 4     | rt      | 50        |
| <b>1b</b> | Cu(OAc) <sub>2</sub> .H <sub>2</sub> O                | NiCl <sub>2</sub>                                    | Et <sub>3</sub> N       | pyridine               | <b>DMF</b>                                        | O <sub>2</sub>                    | 48    | rt      | 40        |
| <b>1b</b> | Cu(OAc) <sub>2</sub> .H <sub>2</sub> O                | NiCl <sub>2</sub>                                    | Et <sub>3</sub> N       | pyridine               | <b>H<sub>2</sub>O</b>                             | O <sub>2</sub>                    | 192   | rt-60°C | 0         |
| <b>1b</b> | Cu(OAc) <sub>2</sub> .H <sub>2</sub> O                | NiCl <sub>2</sub>                                    | Et <sub>3</sub> N       | pyridine               | <b>H<sub>2</sub>O/<br/>Dioxane (1/1)</b>          | O <sub>2</sub>                    | 216   | rt-60°C | 90        |
| <b>1b</b> | Cu(OAc) <sub>2</sub> .H <sub>2</sub> O                | NiCl <sub>2</sub>                                    | Et <sub>3</sub> N       | pyridine               | <b>H<sub>2</sub>O/<br/>CH<sub>3</sub>CN (1/1)</b> | O <sub>2</sub>                    | 216   | rt-60°C | 0         |
| <b>1b</b> | Cu(OAc) <sub>2</sub> .H <sub>2</sub> O                | NiCl <sub>2</sub>                                    | Et <sub>3</sub> N       | pyridine               | <b>DMSO</b>                                       | O <sub>2</sub>                    | 48    | rt      | 93        |
| <b>1b</b> | Cu(OAc) <sub>2</sub> .H <sub>2</sub> O                | NiCl <sub>2</sub>                                    | Et <sub>3</sub> N       | pyridine               | EtOH                                              | <b>MnO<sub>2</sub></b>            | 72    | rt      | >99       |
| <b>1b</b> | Cu(OAc) <sub>2</sub> .H <sub>2</sub> O                | NiCl <sub>2</sub>                                    | Et <sub>3</sub> N       | pyridine               | EtOH                                              | <b>H<sub>2</sub>O<sub>2</sub></b> | 72    | rt      | 50        |
| <b>1b</b> | Cu(OAc) <sub>2</sub> .H <sub>2</sub> O                | NiCl <sub>2</sub>                                    | Et <sub>3</sub> N       | pyridine               | EtOH                                              | <b>air</b>                        | 120   | rt      | 92        |
| <b>1b</b> | Cu(OAc) <sub>2</sub> .H <sub>2</sub> O                | NiCl <sub>2</sub>                                    | Et <sub>3</sub> N       | pyridine               | EtOH                                              | <b>Pyridine<br/>N-oxide</b>       | 24    | rt      | >99       |

**Table 1:** Model study

## Synthesis of starting materials **1a** and **1b**

### *tert*-Butyl (*S*)-(1-(benzylamino)-1-oxopent-4-yn-2-yl)carbamate **1a**

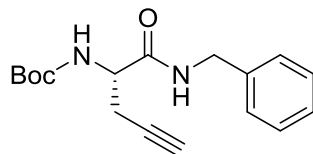

(*S*)-2-((*tert*-Butoxycarbonyl)amino)pent-4-ynoic acid (1.41 mmol), 1-hydroxy-7-azabenzotriazole (HOAt) (4.22 mmol) and 1-ethyl-3-(3-dimethylaminopropyl)carbodiimide hydrochloride (EDC.HCl) (1.41 mmol) were dissolved in CH<sub>2</sub>Cl<sub>2</sub> (40 ml). DIPEA (*N,N*-diisopropylethylamine) (4.22 mmol) was added dropwise and the mixture was stirred at rt for 5 min. The reaction was cooled to 0 °C and benzylamine (1.41 mmol) in CH<sub>2</sub>Cl<sub>2</sub> (5 ml) was added dropwise. The reaction mixture was stirred at rt for 26 h protected from atmospheric moisture via a CaCl<sub>2</sub>-tube, concentrated *in vacuo* and the resulting residue was triturated in EtOAc (15 ml) and filtered. The filtrate was washed with a saturated aqueous citric acid solution (15 ml), a saturated aqueous KHCO<sub>3</sub> solution (2x15 ml) and brine (2x15 ml). The organic phase was dried over MgSO<sub>4</sub>, filtered and concentrated *in vacuo* to afford *tert*-butyl (*S*)-(1-(benzylamino)-1-oxopent-4-yn-2-yl)carbamate as a white solid in 71% yield (0.31 g); mp: 89.5 – 91.1 °C; IR (neat): 3230, 2074, 1736, 1675 cm<sup>-1</sup>; <sup>1</sup>H NMR (250 MHz, CDCl<sub>3</sub>): δ 7.22 – 7.38 (m, 5 H), 6.62 (br. s, 1 H), 5.28 (br. s, 1 H), 4.44 – 4.53 (m, 2 H), 4.25 – 4.39 (m, 1 H), 2.79 – 2.91 (m, 1 H), 2.56 – 2.69 (m, 1 H), 2.06 (t, *J* = 2.7 Hz, 1 H), 1.43 (s, 9 H); <sup>13</sup>C NMR (163 MHz, CDCl<sub>3</sub>) δ 170.5, 155.6, 137.8, 128.9, 127.9, 127.8, 81.0, 79.6, 72.0, 53.3, 43.9, 28.4, 22.6; HRMS Calcd for [C<sub>17</sub>H<sub>22</sub>N<sub>2</sub>O<sub>3</sub> – Boc + H<sup>+</sup>]: 203.1179. Found 203.1183.

### *tert*-Butyl (*S*)-(1-(benzylamino)-1-oxo-3-(prop-2-yn-1-yloxy)propan-2-yl)carbamate **1b**

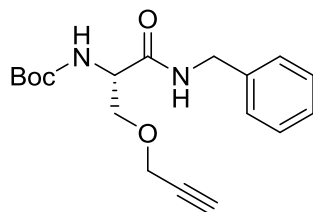

*N*-(*tert*-Butoxycarbonyl)-*O*-(prop-2-yn-1-yl)-*L*-serine (21.46 mmol), HOAt (64.40 mmol) and EDC.HCl (64.40 mmol) were dissolved in CH<sub>2</sub>Cl<sub>2</sub> (150 ml). DIPEA (64.40 mmol) was added dropwise and the mixture was stirred at rt for 5 min. The reaction mixture was cooled to 0 °C and benzylamine (64.40 mmol) in CH<sub>2</sub>Cl<sub>2</sub> (5 ml) was added dropwise. After stirring for 36h at rt protected from atmospheric moisture via a CaCl<sub>2</sub>-tube, the reaction mixture was concentrated *in vacuo*. The resulting residue was triturated with EtOAc (50 ml) and filtered. The filtrate was washed with an aqueous saturated citric acid solution (50 ml), an aqueous saturated KHCO<sub>3</sub> solution (2x50 ml) and brine (2x50 ml). The organic phase was dried over MgSO<sub>4</sub>, filtered and concentrated *in vacuo*. The residue was purified via column silica gel chromatography (EtOAc/hexane 1/1) to afford *tert*-butyl (*S*)-(1-(benzylamino)-1-oxo-3-(prop-2-yn-1-yloxy)propan-2-yl)carbamate as a white solid in 45% yield (3.18 g); mp: 100.0 – 102.0 °C; IR (neat): 3300, 2178, 1742, 1095 cm<sup>-1</sup>; <sup>1</sup>H NMR (250 MHz, CDCl<sub>3</sub>): δ 7.20 – 7.36 (m, 5 H), 6.81 (t, *J* = 5.4 Hz, 1 H), 5.36 – 5.55 (m, 1 H), 4.41 – 4.51 (m, 2 H), 4.33 (br. s., 1 H), 4.15 (m, 2 H), 3.94 (dd, *J* = 4.4 and 3.8 Hz, 1 H), 3.69 (dd, *J* = 6.3 and 4.4 Hz, 1 H), 2.45 (t, *J* = 2.4 Hz, 1 H), 1.42 (s, 9 H); <sup>13</sup>C NMR (63 MHz, CDCl<sub>3</sub>): δ 170.0, 155.5, 137.9, 128.6,

127.5, 127.4, 80.4, 78.9, 75.2, 69.6, 58.6, 54.1, 43.4, 28.3; HRMS Calcd for  $[C_{18}H_{24}N_2O_4 - \text{Boc} + H^+]$ : 233.1284. Found 233.1270. The obtained spectroscopic data were in accordance with literature data.<sup>1</sup>

### Synthesis of diynes **2a** and **2b**

Di-*tert*-butyl ((2*S*,9*S*)-1,10-bis(benzylamino)-1,10-dioxodeca-4,6-diyne-2,9-diyl)dicarbamate **2a**

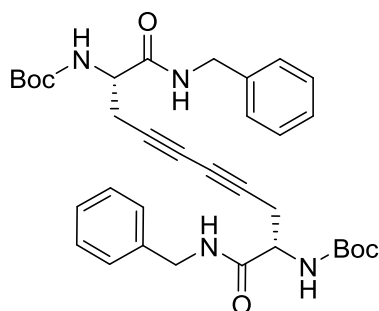

*tert*-Butyl (*S*)-(1-(benzylamino)-1-oxo-3-(prop-2-yn-1-yloxy)propan-2-yl)carbamate (**1a**) (0.083 mmol),  $\text{Cu}(\text{OAc})_2 \cdot \text{H}_2\text{O}$  (0.04 mmol) and  $\text{NiCl}_2$  (0.04 mmol) were added to EtOH (0.5 ml). Subsequently,  $\text{Et}_3\text{N}$  (0.25 mmol) and pyridine (0.41 mmol) were added dropwise to the mixture. The reaction mixture was stirred under  $\text{O}_2$ -atmosphere at rt for 4d. Afterwards, the reaction mixture was concentrated *in vacuo*. EtOAc (2 ml) was added and the mixture was acidified to pH 5 with an aqueous saturated citric acid solution and extracted with EtOAc (2x5 ml). The combined organic phases were washed with a saturated  $\text{NH}_4\text{Cl}$  solution (5 ml), brine (2x5 ml), dried with  $\text{MgSO}_4$ , filtered and concentrated *in vacuo*. The resulting mixture was purified via column silica gel chromatography (EtOAc/hexane 1/1) to afford di-*tert*-butyl ((2*S*,9*S*)-1,10-bis(benzylamino)-1,10-dioxodeca-4,6-diyne-2,9-diyl)dicarbamate as a yellow solid in 36% yield (18 mg); mp: 82.0-82.9 °C; IR (neat): 2217, 2143, 1729, 1681  $\text{cm}^{-1}$ ;  $^1\text{H}$  NMR (250 MHz,  $\text{CDCl}_3$ ):  $\delta$  7.15 – 7.41 (m, 10 H), 6.78 – 6.88 (m, 2 H), 5.45 (d,  $J = 7.8$  Hz, 2 H), 4.26 – 4.50 (m, 6 H), 2.77 (ddd,  $J = 19.6, 6.2, 6.2$  Hz, 4 H), 1.41 (s, 18 H);  $^{13}\text{C}$  NMR (63 MHz,  $\text{CDCl}_3$ )  $\delta$  170.0, 155.3, 137.7, 128.7, 127.6, 127.5, 80.7, 73.3, 67.9, 53.0, 43.5, 28.2, 23.4; HRMS Calcd for  $[C_{34}H_{42}N_4O_6 + \text{Na}^+]$ : 625.2997. Found 625.3010.

Di-*tert*-butyl ((4*S*,15*S*)-3,16-dioxo-1,18-diphenyl-6,13-dioxa-2,17-diazaoctadeca-8,10-diyne-4,15-diyl)dicarbamate **2b**

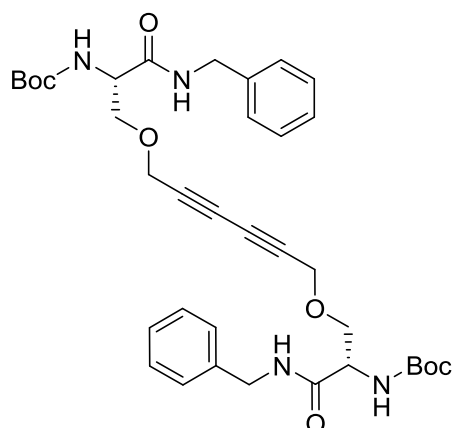

*tert*-Butyl (*S*)-((*S*)-3-(prop-2-yn-1-yloxy)propanoate)benzylcarbamate (**1b**) (6.72 mmol) and  $\text{Cu}(\text{OAc})_2 \cdot \text{H}_2\text{O}$  (3.36 mmol) were added to EtOH (50 ml). Triethylamine (20.15 mmol) and pyridine (33.6 mmol) were added dropwise to the reaction mixture and the reaction mixture was stirred for 22h under  $\text{O}_2$ -atmosphere at rt. The reaction mixture was concentrated in vacuo and EtOAc (30 ml) was added to the residue. The mixture was acidified to pH 5 with an aqueous saturated citric acid solution and extracted with EtOAc (2x30 ml). The combined organic phases were washed with an aqueous saturated  $\text{NH}_4\text{Cl}$  solution (10 ml), brine (2x20 ml), dried over  $\text{MgSO}_4$ , filtered and concentrated *in vacuo*. The resulting residue was purified via column silica gel chromatography (hexane/EtOAc 1/2) to afford di-*tert*-butyl ((*4S*,*15S*)-3,16-dioxo-1,18-diphenyl-6,13-dioxa-2,17-diazaoctadeca-8,10-diyne-4,15-diyl)dicarbamate as yellow solid in 61% yield (2.69 g); mp: 64.1 – 66.2 °C; IR (neat): 2236, 2156, 1753, 1666, 1070  $\text{cm}^{-1}$ ;  $^1\text{H}$  NMR (250 MHz,  $\text{CDCl}_3$ ):  $\delta$  7.19 – 7.40 (m, 10H), 6.68 (t,  $J = 5.2$  Hz, 2H), 5.37 (br. s., 2H), 4.48 (d,  $J = 5.9$  Hz, 4H), 4.32 (br. s., 2H), 4.25 (d,  $J = 4.8$  Hz, 4H), 3.95 (dd,  $J = 4.4$  and 3.8 Hz, 2H), 3.69 (dd,  $J = 6.3$  and 4.4 Hz, 2H), 1.43 (s, 18H);  $^{13}\text{C}$  NMR (63 MHz,  $\text{CDCl}_3$ )  $\delta$  169.8, 155.4, 137.9, 128.7, 127.5, 80.5, 75.0, 70.9, 69.8, 59.1, 54.1, 43.5, 28.3; HRMS Calcd for  $[\text{C}_{36}\text{H}_{46}\text{N}_4\text{O}_8 + \text{H}^+]$ : 663.3399. Found: 663.3389.

## 2. Synthesis of Fmoc-AA(*O*-propargyl)-OH **18** and **20**

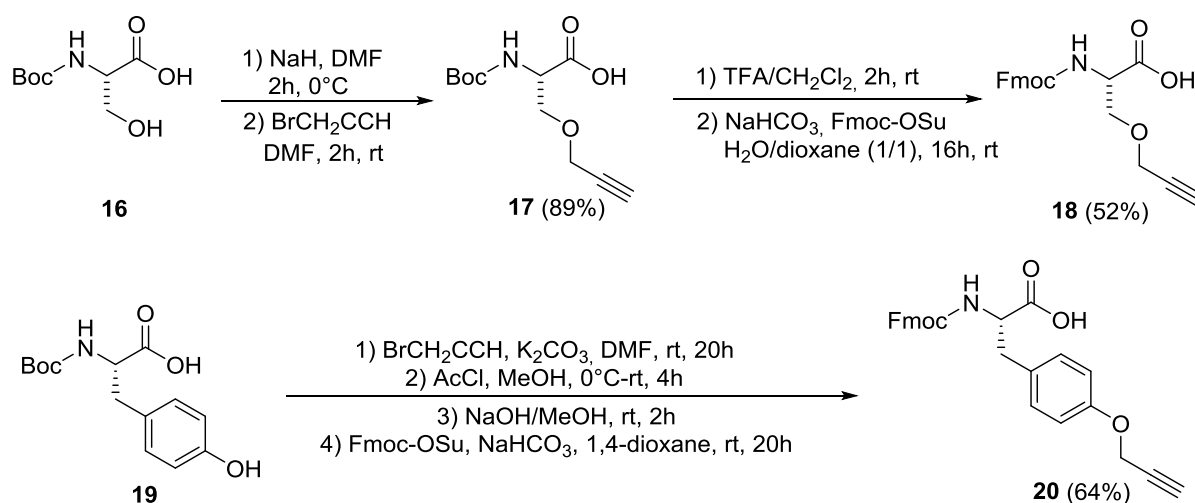

**Scheme 1:** Synthesis of Fmoc protected amino acids **18** and **20**.

*N*-(*tert*-butoxycarbonyl)-*O*-(prop-2-yn-1-yl)-*L*-serine **17**:

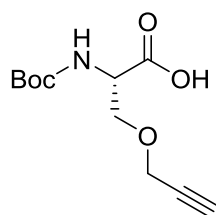

*N*-(*tert*-Butoxycarbonyl)-*O*-(prop-2-yn-1-yl)-*L*-serine **17** was synthesised according to literature.<sup>2</sup> (*tert*-Butoxycarbonyl)-*L*-serine (24.37 mmol) was dissolved in DMF (150 ml). The solution was cooled to 0 °C and NaH (58.50 mmol, 60 wt-% suspension in mineral oil) was added in portions. After stirring for 2h protected from atmospheric moisture with a CaCl<sub>2</sub>-tube, propargylbromide (34.10 mol, 80 wt-% in toluene) was added dropwise. After stirring for 2h at rt, the excess NaH was destroyed by addition of H<sub>2</sub>O (50 ml), where the first 2 ml were carefully dropped. The resulting reaction mixture was concentrated *in vacuo*, dissolved in H<sub>2</sub>O (150 ml), washed with Et<sub>2</sub>O (50 ml) and acidified with 1M KHSO<sub>4</sub> to pH 1-2. The acidic aqueous phase was extracted with EtOAc (2x50 ml) and the combined organic phases were washed with brine (5x20 ml). The organic layer was dried over MgSO<sub>4</sub>, filtered and concentrated *in vacuo* to afford *N*-(*tert*-butoxycarbonyl)-*O*-(prop-2-yn-1-yl)-*L*-serine as a orange oil in 89% yield (6.80 g). IR (neat): 3336, 2078, 1736, 1559, 1123 cm<sup>-1</sup>; <sup>1</sup>H NMR (CDCl<sub>3</sub>, 250 MHz): δ 5.39 (d, *J* = 8.2 Hz, 1H), 4.49 (d, *J* = 8.2 Hz, 1H), 4.16 – 4.23 (m, 2H), 4.00 (dd, *J* = 9.3 and 3.0 Hz, 1H), 3.81 (dd, *J* = 9.4 and 3.5 Hz, 1H), 2.47 (t, *J* = 2.4 Hz, 1H), 1.47 (s, 9 H); <sup>13</sup>C NMR (CDCl<sub>3</sub>, 63 MHz): δ 175.2, 156.0, 80.7, 78.9, 75.5, 69.7, 58.9, 53.9, 28.5; HRMS Calcd for [C<sub>11</sub>H<sub>17</sub>NO<sub>5</sub> + Na<sup>+</sup>]: 266.0999. Found: 266.0992. The obtained spectroscopic data were in accordance with literature data.<sup>2</sup>

*N*-(((9H-fluoren-9-yl)methoxy)carbonyl)-*O*-(prop-2-yn-1-yl)-*L*-serine **18**:

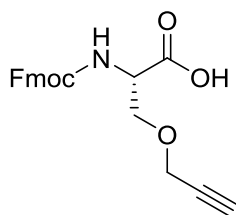

*tert*-Butyl (*S*)-(1-(benzylamino)-1-oxo-3-(prop-2-yn-1-yloxy)propan-2-yl)carbamate (21.71 mmol) was dissolved in CH<sub>2</sub>Cl<sub>2</sub> (50 ml), followed by the addition of an excess of TFA (40 ml). The reaction mixture was stirred at rt for 2h and concentrated *in vacuo*. The obtained oil was dissolved in H<sub>2</sub>O (50 ml) and the pH of the solution was adjusted to pH 10 with an aqueous saturated NaHCO<sub>3</sub> solution (30 ml). This basic aqueous solution was added to a solution of Fmoc-OSu (*N*-(9-fluorenylmethoxycarbonyloxy)succinimide) (23.88 mmol) in 1,4-dioxane (75 ml). Afterwards, the reaction mixture was stirred at rt for 16h. The reaction mixture was concentrated *in vacuo* and the residual oil was dissolved in EtOAc (140 ml). The organic phase was extracted with an aqueous 1% NaHCO<sub>3</sub> solution (2x100 ml). The pH of the combined aqueous layers were adjusted to pH 1 with an aqueous 6M HCl, followed by extraction with EtOAc (4x10 0ml). The combined organic phases were washed with brine (2x50 ml), dried over MgSO<sub>4</sub>, filtered and concentrated *in vacuo*. The resulting residue was triturated with Et<sub>2</sub>O (50 ml), filtered and and the obtained solids were dried (0.05 mmHg) to

afford *N*-(((9H-fluoren-9-yl)methoxy)carbonyl)-*O*-(prop-2-yn-1-yl)-L-serine as a white solid in 52% yield (4.10 g); mp: 156.1 – 157.9 °C; IR (neat): 3300, 2166, 1753, 1427, 1070 cm<sup>-1</sup>; <sup>1</sup>H NMR (250 MHz, DMSO-d<sub>6</sub>): δ 12.81 (br. s, H), 7.88 (d, *J* = 7.3 Hz, 2H), 7.74 (d, *J* = 7.1 Hz, 2H), 7.67 (d, *J* = 8.2 Hz, 1H), 7.36 (dtd, *J* = 23.5 and 7.8 and 1.4 Hz, 4H), 4.17 – 4.30 (m, 4H), 4.15 (d, *J* = 2.3 Hz, 2H), 3.70 (d, *J* = 5.6 Hz, 2H), 3.46 (t, *J* = 2.3 Hz, 1H); <sup>13</sup>C NMR (63 MHz, DMSO-d<sub>6</sub>) δ 171.4, 156.0, 143.8, 140.7, 127.6, 127.0, 125.3, 120.1, 79.8, 77.5, 68.6, 65.8, 57.7, 53.9, 46.6; HRMS Calcd for [C<sub>21</sub>H<sub>19</sub>NO<sub>5</sub> + H<sup>+</sup>]: 366.1348. Found: 366.1336.

(*S*)-2-(((9H-Fluoren-9-yl)methoxy)carbonyl)amino)-3-(4-(prop-2-yn-1-yloxy)phenyl)propanoic acid **20**

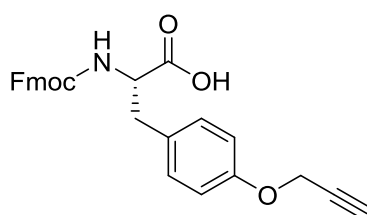

(*S*)-2-(((9H-Fluoren-9-yl)methoxy)carbonyl)amino)-3-(4-(prop-2-yn-1-yloxy)phenyl)propanoic acid was synthesised according to literature.<sup>3</sup> K<sub>2</sub>CO<sub>3</sub> (64.0 mmol) was added to a solution of (*tert*-butoxycarbonyl)-L-tyrosine (21.33 mmol) in DMF (30 ml). Propargylbromide (64.0 mmol, 80 wt-% in toluene) was added dropwise to the reaction mixture and stirred at rt for 20h closed from the atmospheric moisture with a CaCl<sub>2</sub>-tube. The reaction mixture was diluted with H<sub>2</sub>O (150 ml) and extracted with EtOAc (2x100 ml). The combined organic phases were dried over MgSO<sub>4</sub>, filtered and concentrated *in vacuo*. The resulting residue was added to a solution of acetyl chloride (21 ml) in MeOH (180 ml) at 0 °C and stirred for 4h. The reaction mixture was concentrated *in vacuo* and the obtained residue was added to a mixture of 2M NaOH (42 ml) and MeOH (30 ml) and stirred at rt for 2h. The pH of the solution was adjusted to pH 7 with concentrated HCl and stirred overnight at 0 °C. The formed precipitate was filtered, washed with cold H<sub>2</sub>O and dried to obtain a white powder. The obtained solid was dissolved in a 1,4-dioxane/H<sub>2</sub>O mixture (1/1) (80 ml), followed by the addition of NaHCO<sub>3</sub> (5.50 mmol). After stirring for 30min at rt, Fmoc-OSu (5.50 mmol) was added and the resulting reaction mixture was stirred for 20h at rt. The reaction mixture was concentrated *in vacuo* and the obtained residue was purified via column silica gel chromatography (CH<sub>2</sub>Cl<sub>2</sub>/MeOH/AcOH 100/10/1) to afford (*S*)-2-(((9H-fluoren-9-yl)methoxy)carbonyl)amino)-3-(4-(prop-2-yn-1-yloxy)phenyl)propanoic acid as a white solid in 64% yield (2.38 g); mp: 132.4 – 137.2 °C; IR (neat): 3283, 3039, 2134, 1740 cm<sup>-1</sup>; <sup>1</sup>H NMR (250 MHz, DMSO-d<sub>6</sub>): δ 12.68 (br. s, 1H), 7.87 (d, *J* = 7.3 Hz, 2H), 7.66 (m, 3H), 7.40 (t, *J* = 7.4 Hz, 2H), 7.29 (q, *J* = 7.5 Hz, 2H), 7.19 (d, *J* = 8.6 Hz, 2H), 6.87 (d, *J* = 8.6 Hz, 2H), 4.72 (d, *J* = 2.5 Hz, 2H), 4.03 – 4.24 (m, 4H), 3.52 (t, *J* = 2.6 Hz, 1H), 3.01 (dd, *J* = 6.9 and 3.8 Hz, 1H), 2.80 (dd, *J* = 10.0 and 7.5 Hz, 1H); <sup>13</sup>C NMR (126 MHz, DMSO-d<sub>6</sub>) δ 174.0, 156.6, 156.5, 144.4, 141.4, 131.3, 130.8, 128.3, 127.7, 126.0, 120.8, 115.2, 80.1, 78.7, 86.3, 56.4, 56.0, 47.3, 36.3; HRMS Calcd for [C<sub>27</sub>H<sub>23</sub>NO<sub>5</sub> + Na<sup>+</sup>]: 464.1469. Found 464.1466.

### 3. Solution phase synthesis of peptides 13a-c, 14a-c and 15a-c

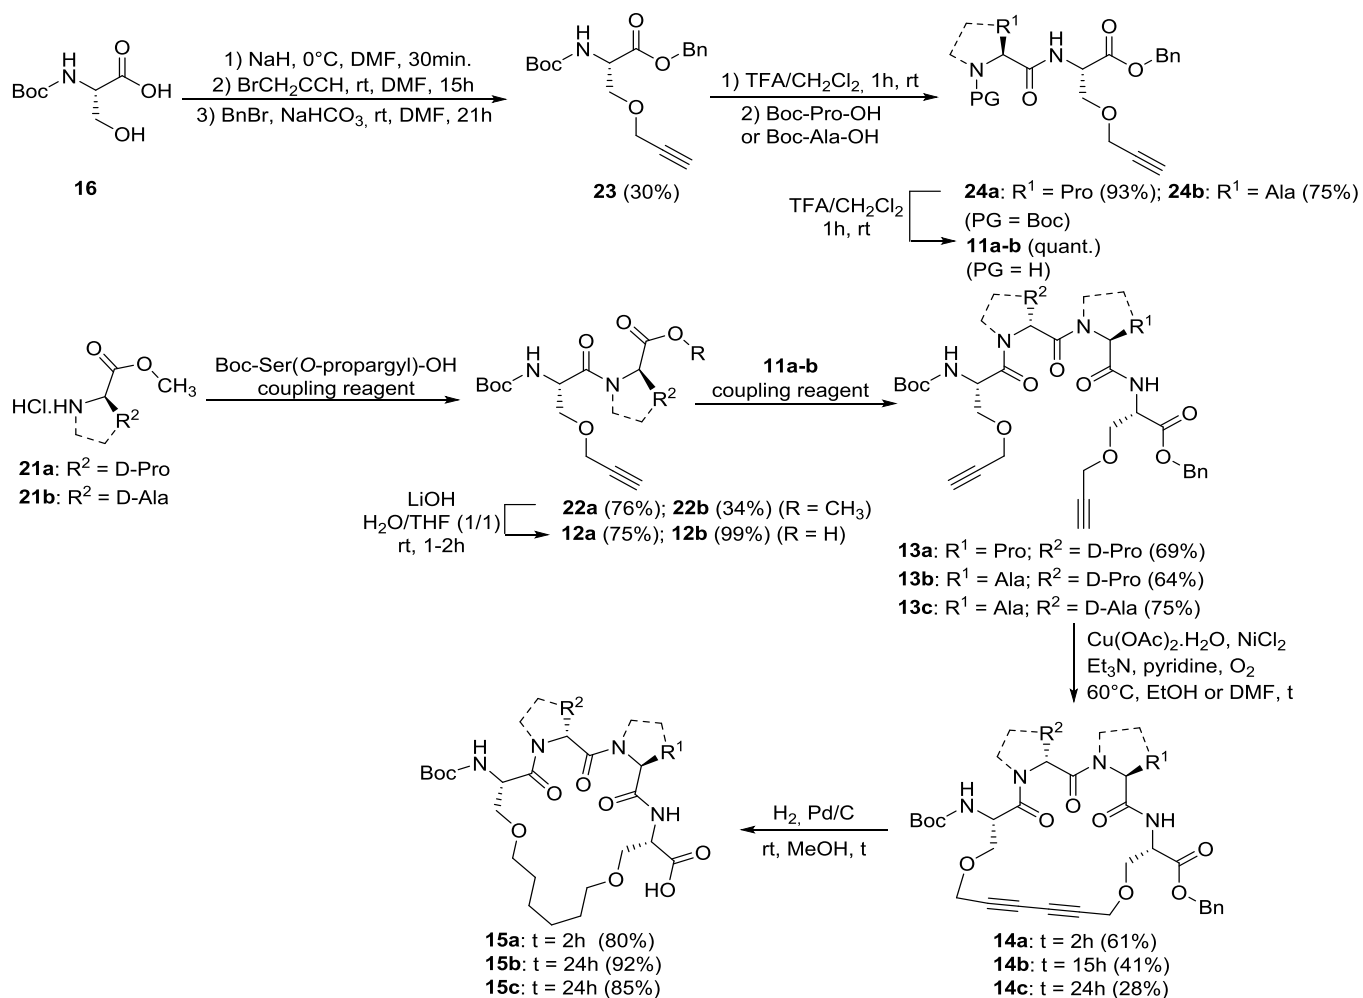

**Scheme 2:** Synthesis of dipeptides **11a-b** and **12a-b** and tetrapeptides **13a-c**, **14a-c** and **15a-c**

#### Synthesis of dipeptides **12a-b** and **24a-b**:

Benzyl *N*-(*tert*-butoxycarbonyl)-*O*-(prop-2-yn-1-yl)-L-serinate **23**

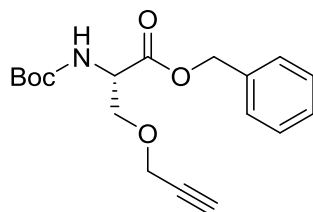

Benzyl *N*-(*tert*-butoxycarbonyl)-*O*-(prop-2-yn-1-yl)-L-serinate **23** was synthesised according to literature.<sup>4</sup> (*tert*-Butoxycarbonyl)-L-serine (21.10 mmol) was dissolved in DMF (150 ml). NaH (42.20 mmol, 60 wt-% suspension in mineral oil) was added slowly. After stirring for 30min, propargylbromide (29.50 mmol, 80 wt-% in toluene) was added. The reaction mixture was stirred at rt for 15h closed for atmospheric moisture with a CaCl<sub>2</sub>-tube. The reaction mixture was diluted with brine (200 ml) and extracted with EtOAc (2x100 ml). The aqueous layer was acidified to pH 1-2 with 1M KHSO<sub>4</sub> and extracted with EtOAc (3x150 ml). The



combined organic layers were dried over  $\text{MgSO}_4$ , filtered, concentrated *in vacuo* and the resulting residue was dissolved in DMF (150 ml).  $\text{NaHCO}_3$  (42.20 mmol) and benzyl bromide (52.80 mmol) were added dropwise. The reaction mixture was stirred at rt for 21h, diluted with brine (150 ml) and extracted with EtOAc (3x100 ml). The combined organic layers were washed with brine (2x100 ml), dried over  $\text{MgSO}_4$ , filtered and concentrated *in vacuo*. The obtained mixture was purified via column silica gel chromatography (hexane/EtOAc 1/1) to afford benzyl *N*-(*tert*-butoxycarbonyl)-*O*-(prop-2-yn-1-yl)-L-serinate as a colourless liquid in 30% yield (2.07 g). IR (neat): 3289, 2134, 1746  $\text{cm}^{-1}$ ;  $^1\text{H}$  NMR (250 MHz,  $\text{CDCl}_3$ ):  $\delta$  7.29 – 7.44 (m, 5 H), 5.41 (d,  $J = 8.8$  Hz, 1 H), 5.23 (dd,  $J = 12.5$  Hz, 2 H), 4.46 – 4.57 (m, 1 H), 4.12 (d,  $J = 2.5$  Hz, 2 H), 4.01 (dd,  $J = 5.0, 2.5$  Hz, 1 H), 3.78 (dd,  $J = 5.0, 2.5$  Hz, 1 H), 2.42 (t,  $J = 2.3$  Hz, 1 H), 1.46 (s, 9 H);  $^{13}\text{C}$  NMR ( $\text{CDCl}_3$ , 126 MHz,):  $\delta = 170.6, 155.7, 135.7, 128.8, 128.5, 128.3, 80.3, 79.0, 75.3, 70.0, 67.4, 58.8, 54.2, 28.5$ ; HRMS Calcd for  $[\text{C}_{18}\text{H}_{23}\text{NO}_5 + \text{Na}^+]$ : 356.1469. Found 356.1475. The obtained spectroscopic data were in accordance with literature data.<sup>4</sup>

*tert*-Butyl (S)-2-(((S)-1-(benzyloxy)-1-oxo-3-(prop-2-yn-1-yloxy)propan-2-yl)carbamoyl)pyrrolidine-1-carboxylate **24a**

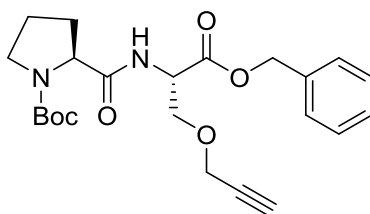

Benzyl *N*-(*tert*-butoxycarbonyl)-*O*-(prop-2-yn-1-yl)-L-serinate (3.0 mmol) was dissolved in TFA (5 ml) and  $\text{CH}_2\text{Cl}_2$  (5 ml) and stirred for 1h at rt protected from atmospheric moisture with a  $\text{CaCl}_2$ -tube. The reaction mixture was concentrated *in vacuo* and dissolved in  $\text{CH}_2\text{Cl}_2$  (20 ml). The reaction mixture was cooled to 0 °C and *N*-Boc-Proline (3.0 mmol) and HOAt (6.0 mmol) were added. EDC.HCl (6.0 mmol) and DIPEA (6.0 mmol) were added next and the reaction mixture was stirred for 1h at rt protected from atmospheric moisture with a  $\text{CaCl}_2$ -tube. The reaction mixture was diluted with EtOAc (20 ml) and washed with  $\text{H}_2\text{O}$  (3x20 ml) and brine (3x20 ml). The organic layer was dried over  $\text{MgSO}_4$ , filtered, concentrated *in vacuo* and purified via column silica gel chromatography (petroleumether/EtOAc 5/1) to afford *tert*-butyl (S)-2-(((S)-1-(benzyloxy)-1-oxo-3-(prop-2-yn-1-yloxy)propan-2-yl)carbamoyl)pyrrolidine-1-carboxylate as a yellow oil in 80% yield (1.03 g). IR (neat): 3288, 2114, 1744, 1674  $\text{cm}^{-1}$ ;  $^1\text{H}$  NMR (250 MHz,  $\text{CDCl}_3$ ):  $\delta = 7.32 - 7.43$  (m, 5 H), 6.88 (br. S., 1 H), 5.22 (dd,  $J = 12.5$  Hz and 12.5 Hz, 2 H), 4.81 (br. S., 1 H), 4.31 (br. S., 1 H), 4.11 (d,  $J = 2.5$  Hz, 2 H), 4.00 (dd,  $J = 2.5$  Hz and 2.5 Hz, 1 H), 3.79 (dd,  $J = 2.5$  Hz and 2.5 Hz, 1 H), 3.34 – 3.58 (m, 2 H), 2.40 (t,  $J = 2.4$  Hz, 1 H), 2.17 (br. S., 2 H), 1.83 – 1.90 (m, 4 H), 1.47 (s, 9 H);  $^{13}\text{C}$  NMR (126 MHz,  $\text{CDCl}_3$ ):  $\delta 172.8, 169.8, 149.9, 135.6, 128.8, 128.6, 128.4, 79.0, 78.1, 75.3, 69.6, 67.5, 61.2, 58.7, 52.7, 47.2, 31.0, 28.6, 23.9$ ; HRMS Calcd for  $[\text{C}_{23}\text{H}_{30}\text{N}_2\text{O}_6 + \text{Na}^+]$ : 453.1996. Found 453.1991.

## Benzyl *N*-((*tert*-butoxycarbonyl)-*L*-alanyl)-*O*-(prop-2-yn-1-yl)-*L*-serinate **24b**

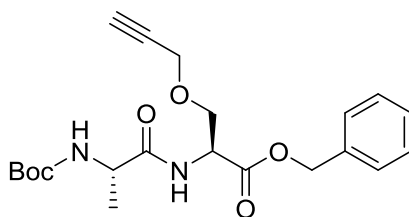

Benzyl *N*-((*tert*-butoxycarbonyl)-*L*-alanyl)-*O*-(prop-2-yn-1-yl)-*L*-serinate (12.6 mmol) was dissolved in TFA (40 ml) and CH<sub>2</sub>Cl<sub>2</sub> (40 ml) and stirred for 1h at rt protected from atmospheric moisture with a CaCl<sub>2</sub>-tube. The reaction mixture was concentrated *in vacuo* and dissolved in DMF (100 ml), followed by the addition of DIPEA (12.6 mmol). This mixture was added to a mixture of *N*-Boc-Alanine (11.5 mmol), HATU (13.7 mmol) and DIPEA (12.6 mmol), dissolved in DMF (100 ml) and stirred for 30min at 0 °C. The resulting mixture was stirred for 15h protected from atmospheric moisture with a CaCl<sub>2</sub>-tube at rt. The reaction mixture was concentrated *in vacuo* and the obtained residu was dissolved in EtOAc (100 ml) and washed with an aqueous 1M KHSO<sub>4</sub> solution (100 ml), an aqueous 1M NaOH solution (100 ml) and brine (3x10 0ml). The organic layer was dried over MgSO<sub>4</sub>, filtered, concentrated *in vacuo* and purified via column silica gel chromatography (petroleumether/EtOAc 3/1) to afford benzyl *N*-((*tert*-butoxycarbonyl)-*L*-alanyl)-*O*-(prop-2-yn-1-yl)-*L*-serinate as a yellow liquid in 75% yield ( 3.5 g). IR (neat) 3351, 2173, 1723, 1699 cm<sup>-1</sup>; <sup>1</sup>H NMR (250 MHz, CDCl<sub>3</sub>): δ = 7.30 - 7.38 (m, 5 H), 6.78 (d, *J* = 8.3 Hz, 1 H), 5.20 (dd, *J* = 7.5 and 5.0 Hz, 2 H), 5.05 (br. s, 1 H), 4.78 – 4.81 (m, 1 H), 4.21 (br. s, 1 H), 4.09 (d, *J* = 2.4 Hz, 2 H), 4.01 (dd, *J* = 9.4 and 3.2 Hz, 1 H), 3.76 (dd, *J* = 9.4 and 3.2 Hz, 1 H), 2.40 (t, *J* = 2.4 Hz, 1 H), 1.44 (s, 9 H), 1.36 (d, *J* = 7.1 Hz, 3 H); <sup>13</sup>C NMR (126 MHz, CDCl<sub>3</sub>): δ = 172.8, 169.8, 155.5, 135.5, 128.8, 128.6, 128.4, 80.3, 79.0, 75.4, 69.5, 67.6, 58.8, 52.8, 50.3, 28.5, 18.9; HRMS Calcd for [C<sub>21</sub>H<sub>28</sub>N<sub>2</sub>O<sub>6</sub> + Na<sup>+</sup>]: 427.1840. Found 427.1836.

## Methyl *D*-prolinate hydrochloride **21b**

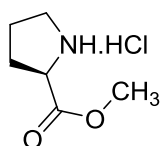

Methyl *D*-prolinate hydrochloride **21b** was synthesised according to literature.<sup>5</sup> To a cooled solution of *D*-proline (4.34 mmol) in MeOH (5 ml) was added SOCl<sub>2</sub> (5.65 mmol) dropwise over 1.5h. The reaction mixture was stirred for 15h at rt protected from atmospheric moisture with a CaCl<sub>2</sub>-tube. The solution was concentrated *in vacuo* to obtain a yellow oil. After high vacuum (0.05 mmHg) drying methyl *D*-prolinate hydrochloride was obtained as a gray oil in quantitative yield (0.72 g). IR (neat): 3391, 1739, 1232 cm<sup>-1</sup>; <sup>1</sup>H NMR (250 MHz, CDCl<sub>3</sub>): δ 10.90 (br. s, 1 H), 9.13 (br. s, 1 H), 4.50 (br. s, 1 H), 3.86 (s, 3 H), 3.42 – 3.74 (m, 2 H), 2.35 – 2.56 (m, 1 H), 1.99 – 2.31 (m, 3 H); <sup>13</sup>C NMR (126 MHz, CDCl<sub>3</sub>): δ 169.2, 59.4, 53.9, 46.3, 29.0, 23.8; HRMS Calcd for [C<sub>6</sub>H<sub>11</sub>NO<sub>2</sub> + H<sup>+</sup>]: 130.0863. Found 130.0868. The obtained spectroscopic data were in accordance with literature data.<sup>5</sup>

Methyl *N*-(*tert*-butoxycarbonyl)-*O*-(prop-2-yn-1-yl)-*L*-seryl-*D*-prolinate **22a**

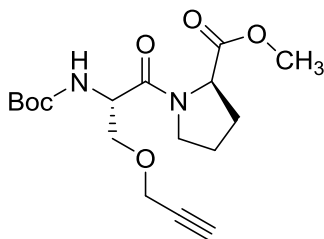

A solution of *N*-(*tert*-butoxycarbonyl)-*O*-(prop-2-yn-1-yl)-*L*-serine (0.82 mmol) in  $\text{CH}_2\text{Cl}_2$  (10 ml) was cooled to  $0^\circ\text{C}$  and treated with (1-[bis(dimethylamino)methylene]-1*H*-1,2,3-triazolo[4,5-*b*]pyridinium 3-oxid hexafluorophosphate) (HATU) (1.15 mmol). Methyl *D*-prolinate hydrochloride (0.99 mmol) was added, followed by the addition of *N*-methylmorpholine (NMM) (3.29 mmol). The reaction mixture was stirred for 15h at  $0^\circ\text{C}$  closed from atmospheric moisture with a  $\text{CaCl}_2$ -tube. The reaction mixture was concentrated *in vacuo* and the obtained residue was dissolved in EtOAc (10 ml). The organic phase was washed with  $\text{H}_2\text{O}$  (2x10 ml), 1M HCl (10 ml), saturated aqueous  $\text{NaHCO}_3$  solution (10 ml) and brine (10 ml). The organic layer was dried over  $\text{MgSO}_4$ , filtered and concentrated *in vacuo*. The obtained residue was purified via column silica gel chromatography (petroleum ether/EtOAc 2/1) to afford methyl *N*-(*tert*-butoxycarbonyl)-*O*-(prop-2-yn-1-yl)-*L*-seryl-*D*-prolinate as a yellow oil in 76% yield (0.22 g). IR (neat): 3276, 2976, 2114, 1744, 1709, 1647;  $^1\text{H}$  NMR (500 MHz,  $\text{CDCl}_3$ ):  $\delta$  5.38 (d,  $J = 8.5$  Hz, 1 H), 4.68 – 4.75 (m, 1 H), 4.48 (dd,  $J = 2.5$  Hz and 2.5 Hz, 1 H), 4.09 – 4.20 (m, 2 H), 3.60 – 3.80 (m, 7 H), 2.42 (t,  $J = 2.5$  Hz, 1 H), 2.17 – 2.28 (m, 1 H), 1.89 – 2.13 (m, 3 H), 1.45 (s, 9 H);  $^{13}\text{C}$  NMR (126 MHz,  $\text{CDCl}_3$ ):  $\delta$  172.4, 169.1, 155.1, 79.9, 79.2, 74.8, 70.3, 59.1, 58.6, 52.2, 51.5, 47.2, 29.2, 28.3, 24.7; HRMS Calcd for  $[\text{C}_{17}\text{H}_{26}\text{N}_2\text{O}_6 + \text{H}^+]$ : 355.1864. Found 355.1859.

Methyl *N*-(*tert*-butoxycarbonyl)-*O*-(prop-2-yn-1-yl)-*L*-seryl-*D*-alaninate **22b**

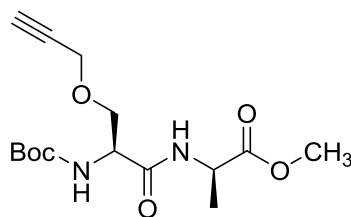

A solution of *N*-(*tert*-butoxycarbonyl)-*O*-(prop-2-yn-1-yl)-*L*-serine (20.6 mmol) in DMF (125 ml) was cooled to  $0^\circ\text{C}$  and treated with benzotriazol-1-ol (HOBt) (24.7 mmol), EDC.HCl (24.7 mmol), DIPEA (22.6 mmol) and a solution of methyl *D*-alaninate hydrochloride (22.6 mmol) and DIPEA (22.6 mmol) in DMF (125 ml). The reaction mixture was stirred for 15h at  $0^\circ\text{C}$  closed from atmospheric moisture with a  $\text{CaCl}_2$ -tube. The reaction mixture was concentrated *in vacuo* and the obtained residue was dissolved in EtOAc (100 ml). The organic phase was washed with an aqueous 1M  $\text{KHSO}_4$  solution (100 ml), an aqueous 1M NaOH solution (100 ml) and brine (3x100 ml). The organic layer was dried over  $\text{MgSO}_4$ , filtered and concentrated *in vacuo*. The obtained residue was purified via column silica gel chromatography (petroleum ether/EtOAc 2/1) to afford methyl *N*-(*tert*-butoxycarbonyl)-*O*-(prop-2-yn-1-yl)-*L*-seryl-*D*-alaninate as a yellow oil in 34% yield (2.32 g). IR (neat): 3294, 2156, 1735, 1654;  $^1\text{H}$  NMR (500 MHz,  $\text{CDCl}_3$ ):  $\delta$  6.86 (br. s, 1 H), 5.35 (br. s, 1 H), 4.56

(quin,  $J = 7.2$  Hz, 1 H), 4.24 - 4.32 (m, 1 H), 4.09 - 4.21 (m, 2 H), 3.89 (br. s, 1 H), 3.72 (s, 3 H), 3.66 (dd,  $J = 9.4, 6.0$  Hz, 1 H), 2.43 (t,  $J = 1.0$  Hz, 1 H), 1.43 (s, 9 H), 1.39 ppm (d,  $J = 6.8$  Hz, 3 H);  $^{13}\text{C}$  NMR (126 MHz,  $\text{CDCl}_3$ ):  $\delta$  173.3, 169.7, 155.8, 80.6, 79.2, 75.4, 69.4, 58.8, 54.1, 52.7, 48.4, 28.5, 18.5 ppm; HRMS Calcd for  $[\text{C}_{15}\text{H}_{24}\text{N}_2\text{O}_6 + \text{H}^+]$ : 329.1701. Found 329.1709.

*N*-(*tert*-Butoxycarbonyl)-*O*-(prop-2-yn-1-yl)-L-seryl-D-proline **12a**

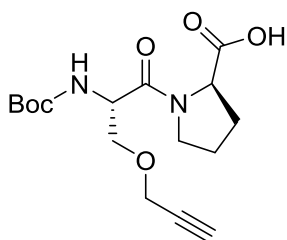

To a solution of *N*-(*tert*-butoxycarbonyl)-*O*-(prop-2-yn-1-yl)-L-seryl-D-prolinate (0.71 mmol) in a mixture of  $\text{H}_2\text{O}$  (10 ml) and THF (10 ml) was  $\text{LiOH}\cdot\text{H}_2\text{O}$  (1.06 mmol) added. The reaction mixture was stirred for 15h at rt protected from atmospheric moisture with a  $\text{CaCl}_2$ -tube. The reaction mixture was diluted with  $\text{H}_2\text{O}$  (10 ml) and EtOAc (10 ml). The aqueous phase was separated and the pH was adjusted to pH 1-2 with a 1M HCl solution. The resulting mixture was extracted with EtOAc (3x20 ml). The organic phase was washed with brine (3x20 ml), dried over  $\text{MgSO}_4$ , filtered and concentrated *in vacuo*. After high vacuum (0.05mm Hg) drying *N*-(*tert*-butoxycarbonyl)-*O*-(prop-2-yn-1-yl)-L-seryl-D-proline was obtained as a yellow solid in 61% yield (0.18 g). mp: 49.2 – 52.3 °C; IR (neat): 3275, 2115, 1704, 1635, 1633  $\text{cm}^{-1}$ ;  $^1\text{H}$  NMR (500 MHz,  $\text{DMSO-d}_6$ ):  $\delta$  12.36 (s, 1 H), 6.87 and 7.29 (d,  $J = 8.2$  Hz, 1 H)\*, 4.45 – 4.54 and 4.77 – 4.83 (m, 1 H)\*, 4.16 – 4.21 and 4.45 – 4.54 (m, 1 H)\*, 4.07 – 4.08 and 4.13 – 4.15 (m, 2 H)\*, 3.46 – 3.52 and 3.53 – 3.70 (m, 2 H)\*, 3.40 – 3.41 and 3.44 – 3.47 (t,  $J = 2.0$  Hz, 1 H)\*, 3.33 – 3.37 and 3.53 – 3.70 (m, 2 H)\*, 2.07 – 2.19 (m, 1 H), 1.65 – 1.74 and 1.82 – 1.95 (m, 3 H)\*, 1.39 and 1.37 (2x s, 9 H)\*;  $^{13}\text{C}$  NMR (126 MHz,  $\text{DMSO-d}_6$ ):  $\delta$   $^{13}\text{C}$  NMR ( $\text{DMSO-d}_6$ , 126MHz):  $\delta$  173.6 + 173.0\*, 168.7 + 168.1\*, 155.4 + 154.9\*, 80.0, 78.3, 77.3 + 77.1\*, 68.9 + 68.6\*, 58.7, 57.7, 51.8 + 51.3\*, 46.4 + 46.1\*, 30.6 + 28.6\*, 28.1 + 27.7\*, 24.3; HRMS Calcd for  $[\text{C}_{16}\text{H}_{24}\text{N}_2\text{O}_6 - \text{Boc} + \text{H}^+]$ : 241.1183. Found 241.1178.

\*Double signals due to rotamerism across the C-N bond of the amide as well as the carbamate.

*N*-(*tert*-Butoxycarbonyl)-*O*-(prop-2-yn-1-yl)-L-seryl-D-alanine **12b**

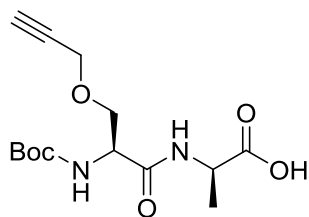

To a solution of methyl *N*-(*tert*-butoxycarbonyl)-*O*-(prop-2-yn-1-yl)-L-seryl-D-alaninate (1.5 mmol) in a mixture of H<sub>2</sub>O (10 ml) and THF (10 ml) was LiOH (3.8 mmol) added. The reaction mixture was stirred for 2h at rt protected from atmospheric moisture with a CaCl<sub>2</sub>-tube. The reaction mixture was diluted with H<sub>2</sub>O (20 ml) and EtOAc (20 ml). The aqueous phase was separated and the pH was adjusted to pH 1-2 with an aqueous 1M HCl solution. The resulting mixture was extracted with EtOAc (3x25 ml). The organic phase was washed with brine (3x25 ml), dried over MgSO<sub>4</sub>, filtered and concentrated *in vacuo* to afford *N*-(*tert*-butoxycarbonyl)-*O*-(prop-2-yn-1-yl)-L-seryl-D-alanine as a yellow solid in 99% yield (0.48 g). mp: 95.2 - 97.3 °C; IR (neat): 3281, 2135, 1714, 1655 cm<sup>-1</sup>; <sup>1</sup>H NMR (500 MHz, CDCl<sub>3</sub>): δ = 7.02 (br. s, 1 H), 5.45 - 5.56 (m, 1 H), 4.58 (br. s, 1 H), 4.47 (br. s, 1 H), 4.09 - 4.22 (m, 2 H), 3.86 (dd, *J* = 9.2, 4.3 Hz, 1 H), 3.68 (br. s, 1 H), 2.44 (t, *J* = 2.4 Hz, 1 H), 1.43 ppm (s, 12 H); <sup>13</sup>C NMR (126 MHz, CDCl<sub>3</sub>): δ 175.5, 170.3, 156.2, 81.0, 79.1, 75.5, 69.6, 58.8, 54.0, 54.0, 48.4, 28.5, 18.3 ppm; HRMS Calcd for [C<sub>14</sub>H<sub>22</sub>N<sub>2</sub>O<sub>6</sub> + H<sup>+</sup>]: 315.1551. Found 315.1556.

### Difficult *D*-Pro Pro coupling:

The coupling of Boc-Pro-OH with dipeptide **11**, after Boc deprotection of **24**, appeared to be problematic due to a difficult *D*-Pro Pro coupling. Several coupling reagents were tried and the conversions were rather poor (Table 2). Therefore, instead of a linear synthesis, a convergent synthesis was chosen towards tetrapeptide **13**, where HATU as coupling reagent in DMF afforded the highest conversion (>80%).

| Entry          | Coupling reagent | solvent                         | t (h) | Conv. (%) |
|----------------|------------------|---------------------------------|-------|-----------|
| 1              | HOBt/EDC         | CH <sub>2</sub> Cl <sub>2</sub> | 48    | 40        |
| 2              | HOAt/EDC         | CH <sub>2</sub> Cl <sub>2</sub> | 48    | 40        |
| 3              | HATU             | CH <sub>2</sub> Cl <sub>2</sub> | 48    | 10        |
| 4              | TBTU             | DMF                             | 24    | 13        |
| 5              | T3P              | EtOAc                           | 72    | 30        |
| 6              | BOP-Cl           | CH <sub>2</sub> Cl <sub>2</sub> | 24    | 0         |
| 7 <sup>a</sup> | PyBOP            | CH <sub>3</sub> CN              | 72    | 30        |

**Table 2:** Evaluation of the *D*-Pro Pro coupling with several coupling reagentia (<sup>a</sup> a complex reaction mixture was obtained)

### Synthesis of tetrapeptides **13b-c**, **14b-c** and **15b-c**:

Benzyl *N*-*N*-(*tert*-butoxycarbonyl)-*O*-(prop-2-yn-1-yl)-L-seryl-D-prolyl-L-alanyl-*O*-(prop-2-yn-1-yl)-L-serinate **13b**

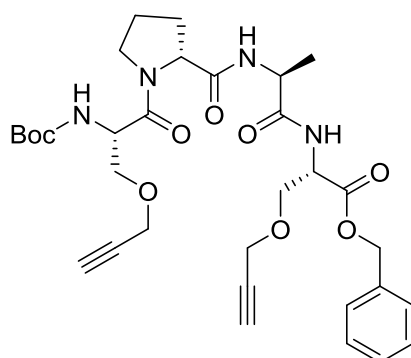

Benzyl *N*-((*tert*-butoxycarbonyl)-L-alanyl)-*O*-(prop-2-yn-1-yl)-L-serinate (2.7 mmol) was dissolved in a mixture of TFA (5 ml) and CH<sub>2</sub>Cl<sub>2</sub> (5 ml). The reaction mixture was stirred for 1h closed from atmospheric moisture with a CaCl<sub>2</sub>-tube and concentrated *in vacuo* to obtain **11b** as a TFA salt. To a cooled solution of *N*-((*tert*-butoxycarbonyl)-*O*-(prop-2-yn-1-yl)-L-seryl-D-proline (2.6 mmol) in CH<sub>2</sub>Cl<sub>2</sub> (10 ml) was added HOBt (3.1 mmol), EDC.HCl (3.1 mmol) and DIPEA (5.7 mmol) and the reaction mixture was stirred for 30min at 0 °C. The TFA salt (**11b**), dissolved in CH<sub>2</sub>Cl<sub>2</sub> (100 ml), was added to the reaction mixture, followed by the addition of DIPEA (2.9 mmol). The reaction mixture was stirred for 15h at rt protected from atmospheric moisture with a CaCl<sub>2</sub>-tube. The reaction mixture was concentrated *in vacuo* and the obtained residue was purified via column silica gel chromatography (CHCl<sub>3</sub>/iPrOH 30/1) to afford benzyl *N*-*N*-((*tert*-butoxycarbonyl)-*O*-(prop-2-yn-1-yl)-L-seryl-D-prolyl-L-alanyl)-*O*-(prop-2-yn-1-yl)-L-serinate as a yellow oil in 64% yield (1.08 g). HRMS Calcd for [C<sub>32</sub>H<sub>42</sub>N<sub>4</sub>O<sub>9</sub> + Na<sup>+</sup>]: 649.2844. Found 649.2865.

Benzyl *N*-*N*-((*tert*-butoxycarbonyl)-*O*-(prop-2-yn-1-yl)-L-seryl-D-alanyl-L-alanyl)-*O*-(prop-2-yn-1-yl)-L-serinate **13c**

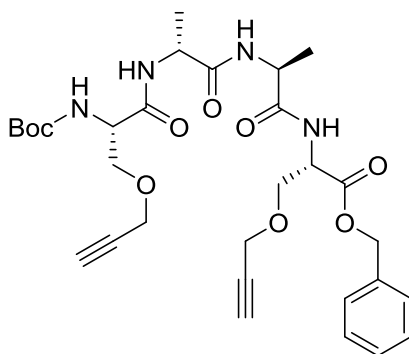

Benzyl *N*-((*tert*-butoxycarbonyl)-L-alanyl)-*O*-(prop-2-yn-1-yl)-L-serinate (8.80 mmol) was dissolved in a mixture of TFA (100 ml) and CH<sub>2</sub>Cl<sub>2</sub> (100 ml) and stirred for 2h. The reaction mixture was evaporated *in vacuo*, dissolved in DMF (150 ml), followed by the addition of DIPEA (8.80 mmol). This mixture was added to a mixture of *N*-((*tert*-butoxycarbonyl)-*O*-(prop-2-yn-1-yl)-L-seryl-D-alanine (7.98 mmol), HOAt (9.57 mmol), EDC.HCl (9.57 mmol) and DIPEA (8.80 mmol), dissolved in DMF (150 ml) and stirred for 30min at 0 °C. The resulting reaction mixture was stirred for 15h at rt, evaporated *in vacuo* and the resulting crude mixture was purified via column silica gel chromatography (CHCl<sub>3</sub>/MeOH 99/1) to afford benzyl *N*-*N*-((*tert*-butoxycarbonyl)-*O*-(prop-2-yn-1-yl)-L-seryl-D-alanyl-L-alanyl)-*O*-(prop-2-yn-1-yl)-L-serinate as a yellow solid in 75% yield (3.60 g). HRMS Calcd for [C<sub>30</sub>H<sub>40</sub>N<sub>4</sub>O<sub>9</sub> + Na<sup>+</sup>]: 623.2687. Found 623.2681.

Benzyl (3*S*,6*S*,9*R*,12*S*)-12-((*tert*-butoxycarbonyl)amino)-tetrahydropyrrolo-[2,1-*i*]-6-methyl-5,8,11-trioxo-1,14-dioxa-4,7,10-triazacycloicosa-16,18-diyne-3-carboxylate **14b**

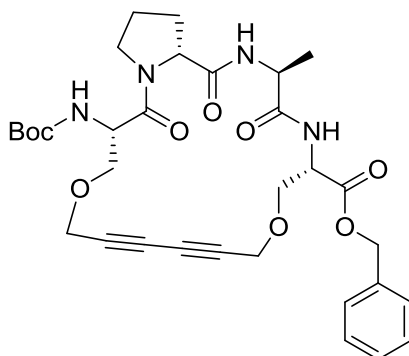

Benzyl *N-N*-(*tert*-butoxycarbonyl)-*O*-(prop-2-yn-1-yl)-*L*-seryl-*D*-prolyl-*L*-alanyl-*O*-(prop-2-yn-1-yl)-*L*-serinate (1.5 mmol), Cu(OAc)<sub>2</sub>·H<sub>2</sub>O (1.5 mmol) and NiCl<sub>2</sub> (1.5 mmol) were added to EtOH (750 ml). Et<sub>3</sub>N (4.5 mmol) and pyridine (7.5 mmol) were added and the reaction mixture was stirred at 60 °C under O<sub>2</sub>-atmosphere for 15h. The reaction mixture was concentrated *in vacuo* and purified via column silica gel chromatography (CH<sub>2</sub>Cl<sub>2</sub>/iPrOH 97/3) to afford benzyl (3*S*,6*S*,9*R*,12*S*)-12-((*tert*-butoxycarbonyl)amino)-10-pyrrolo-6-dimethyl-5,8,11-trioxo-1,14-dioxa-4,7,10-triazacycloicosa-16,18-diyne-3-carboxylate as a red solid in 41% yield (0.38 g). HRMS Calcd for [C<sub>32</sub>H<sub>40</sub>N<sub>4</sub>O<sub>9</sub> + Na<sup>+</sup>]: 647.2687. Found 647.2694.

Benzyl (3*S*,6*S*,9*R*,12*S*)-12-((*tert*-butoxycarbonyl)amino)-6,9-dimethyl-5,8,11-trioxo-1,14-dioxa-4,7,10-triazacycloicosa-16,18-diyne-3-carboxylate **14c**

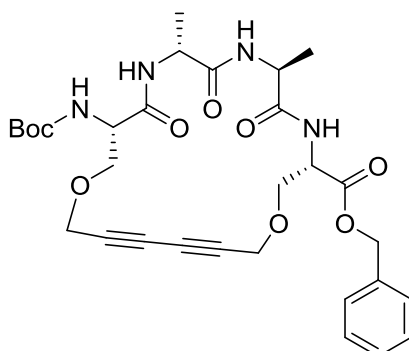

Benzyl *N-N*-(*tert*-butoxycarbonyl)-*O*-(prop-2-yn-1-yl)-*L*-seryl-*D*-alanyl-*L*-alanyl-*O*-(prop-2-yn-1-yl)-*L*-serinate (2.50 mmol), Cu(OAc)<sub>2</sub>·H<sub>2</sub>O (2.50 mmol) and NiCl<sub>2</sub> (2.50 mmol) were added to DMF (1200 ml). Et<sub>3</sub>N (7.49 mmol) and pyridine (12.49 mmol) were added and the reaction mixture was stirred at 60 °C under O<sub>2</sub>-atmosphere for 24h. The reaction mixture was concentrated *in vacuo* and purified via column silica gel chromatography (CHCl<sub>3</sub>/MeOH 99/1) to afford benzyl (3*S*,6*S*,9*R*,12*S*)-12-((*tert*-butoxycarbonyl)amino)-6,9-dimethyl-5,8,11-trioxo-1,14-dioxa-4,7,10-triazacycloicosa-16,18-diyne-3-carboxylate as a white solid in 28% yield (410 mg). HRMS Calcd for [C<sub>30</sub>H<sub>38</sub>N<sub>4</sub>O<sub>9</sub> + H<sup>+</sup>]: 599.2712. Found 599.2718.

(3*S*,6*S*,17*S*,22*aR*)-17-((*tert*-Butoxycarbonyl)amino)-3-methyl-1,4,18-trioxooctadecahydro-1*H*,16*H*-pyrrolo[2,1-*i*][1,14]dioxo[4,7,10]triazacycloicosine-6-carboxylic acid **15b**

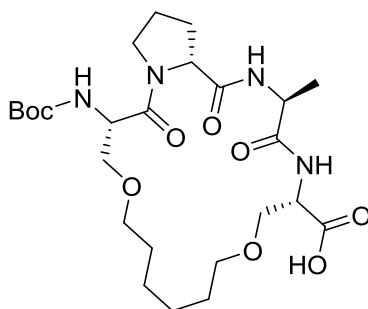

To a mixture of benzyl (3*S*,6*S*,9*R*,12*S*)-12-((*tert*-butoxycarbonyl)amino)-10-pyrrolo-6-dimethyl-5,8,11-trioxo-1,14-dioxo-4,7,10-triazacycloicosa-16,18-diyne-3-carboxylate (0.032 mmol) in MeOH (1 ml) was added palladium on carbon (10 wt-% Pd on C, 10 mg). The reaction mixture was stirred under H<sub>2</sub> (1 atm) at rt for 24h, filtered over Celite and concentrated *in vacuo* to afford (3*S*,6*S*,17*S*,22*aR*)-17-((*tert*-butoxycarbonyl)amino)-3-methyl-1,4,18-trioxooctadecahydro-1*H*,16*H*-pyrrolo[2,1-*i*][1,14]dioxo[4,7,10]triazacycloicosine-6-carboxylic acid as a white solid in 92% yield (16.0 mg). HRMS Calcd for [C<sub>32</sub>H<sub>48</sub>N<sub>4</sub>O<sub>9</sub> + Na<sup>+</sup>]: 565.2844. Found 565.2830.

(3*S*,6*S*,9*R*,12*S*)-12-((*tert*-butoxycarbonyl)amino)-6,9-dimethyl-5,8,11-trioxo-1,14-dioxo-4,7,10-triazacycloicosane-3-carboxylic acid **15c**

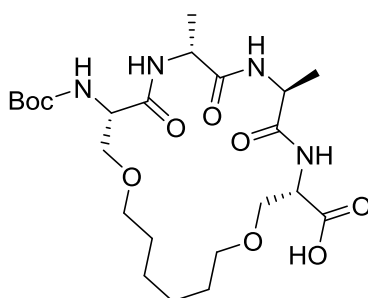

To a mixture of benzyl (3*S*,6*S*,9*R*,12*S*)-12-((*tert*-butoxycarbonyl)amino)-6,9-dimethyl-5,8,11-trioxo-1,14-dioxo-4,7,10-triazacycloicosa-16,18-diyne-3-carboxylate (0.017 mmol) in MeOH (1 ml) was added palladium on carbon (10 wt-% Pd on C, 5 mg). The reaction mixture was stirred under H<sub>2</sub> (1 atm) at rt for 24h, filtered over Celite and concentrated *in vacuo* to afford (3*S*,6*S*,17*S*,22*aR*)-17-((*tert*-butoxycarbonyl)amino)-3-methyl-1,4,18-trioxooctadecahydro-1*H*(3*S*,6*S*,9*R*,12*S*)-12-((*tert*-butoxycarbonyl)amino)-6,9-dimethyl-5,8,11-trioxo-1,14-dioxo-4,7,10-triazacycloicosane-3-carboxylic acid as a white solid in 85% yield (7.5 mg). HRMS Calcd for [C<sub>23</sub>H<sub>40</sub>N<sub>4</sub>O<sub>9</sub> + Na<sup>+</sup>]: 539.2687. Found 539.2693.

#### 4. Solid Phase Peptide Synthesis of 5a-k, 7 and 9

**5a**: 39% yield; HPLC (standard gradient): *t*<sub>ret</sub> = 10.27 min.; HRMS Calcd for [C<sub>24</sub>H<sub>33</sub>N<sub>5</sub>O<sub>7</sub> + H<sup>+</sup>]: 504.2453. Found 504.2444.

**5b**: 43% yield; HPLC (standard gradient): *t*<sub>ret</sub> = 8.62 min.; HRMS Calcd for [C<sub>21</sub>H<sub>29</sub>N<sub>5</sub>O<sub>7</sub> + H<sup>+</sup>]: 464.2140. Found 464.2132.



**5c:** 12% yield; HPLC (standard gradient):  $t_{\text{ret}} = 9.15$  min.; HRMS Calcd for  $[\text{C}_{22}\text{H}_{31}\text{N}_5\text{O}_7 + \text{H}^+]$ : 478.2296. Found 478.2296.

**5d:** 27% yield; HPLC (standard gradient):  $t_{\text{ret}} = 8.95$  min.; HRMS Calcd for  $[\text{C}_{22}\text{H}_{31}\text{N}_5\text{O}_7 + \text{H}^+]$ : 478.2296. Found 478.2273.

**5e:** 41% yield; HPLC (standard gradient):  $t_{\text{ret}} = 8.96$  min.; HRMS Calcd for  $[\text{C}_{21}\text{H}_{31}\text{N}_5\text{O}_7 + \text{H}^+]$ : 466.2296. Found 466.2290.

**5f:** 4 % yield; HPLC (standard gradient):  $t_{\text{ret}} = 9.65$  min.; HRMS Calcd for  $[\text{C}_{23}\text{H}_{33}\text{N}_5\text{O}_7 + \text{H}^+]$ : 492.2453. Found 492.2540.

**5g:** 23% yield; HPLC (standard gradient):  $t_{\text{ret}} = 8.25$  min.; HRMS Calcd for  $[\text{C}_{20}\text{H}_{29}\text{N}_5\text{O}_7 + \text{Na}^+]$ : 474.1959. Found 474.1957.

**5h:** 34% yield; HPLC (standard gradient):  $t_{\text{ret}} = 8.15$  min.; HRMS Calcd for  $[\text{C}_{20}\text{H}_{29}\text{N}_5\text{O}_7 + \text{H}^+]$ : 452.2140. Found 452.2122.

**5i:** 29% yield; HPLC (standard gradient):  $t_{\text{ret}} = 7.10$  min.; HRMS Calcd for  $[\text{C}_{20}\text{H}_{28}\text{N}_6\text{O}_8 + \text{H}^+]$ : 481.2041. Found 481.2030.

**5j:** 23% yield; HPLC (standard gradient):  $t_{\text{ret}} = 12.64$  min.; HRMS Calcd for  $[\text{C}_{28}\text{H}_{35}\text{N}_5\text{O}_9 + \text{H}^+]$ : 586.2507. Found 586.2514.

**5k:** 15 % yield; HPLC (standard gradient):  $t_{\text{ret}} = 12.82$  min.; HRMS Calcd for  $[\text{C}_{31}\text{H}_{42}\text{N}_6\text{O}_9 + \text{H}^+]$ : 643.3086. Found 643.3085.

**7:** 5% yield; HPLC (standard gradient):  $t_{\text{ret}} = 12.63$  min.; HRMS Calcd for  $[\text{C}_{30}\text{H}_{37}\text{N}_5\text{O}_7 + \text{Na}^+]$ : 602.2585. Found 602.2583.

**9:** 9% yield; HPLC (standard gradient):  $t_{\text{ret}} = 14.63$  min.; HRMS Calcd for  $[\text{C}_{36}\text{H}_{41}\text{N}_5\text{O}_7 + \text{H}^+]$ : 656.3079. Found 656.3076.

## 5. Cyclization and purification of peptides 5a-k, 7 and 9

### a. Purification using RP preparative HPLC

The obtained ethanolic reaction mixtures containing the diyne, pyridine, triethylamine and catalysts were evaporated *in vacuo* and directly loaded on the RP HPLC column to give analytically pure samples as white solids after lyophilization.

**6a** 9% yield (3.5 mg); HPLC (standard gradient):  $t_{\text{ret}} = 9.46$  min.; HRMS Calcd for  $[\text{C}_{24}\text{H}_{31}\text{N}_5\text{O}_7 + \text{H}^+]$ : 502.2267. Found 502.2296.

**6b** 39% yield; HPLC (standard gradient):  $t_{\text{ret}} = 8.74$  min.; HRMS Calcd for  $[\text{C}_{21}\text{H}_{27}\text{N}_5\text{O}_7 + \text{H}^+]$ : 462.1983. Found 462.1982.

**6c:** 14% yield; HPLC (standard gradient):  $t_{\text{ret}} = 9.02$  min.; HRMS Calcd for  $[\text{C}_{22}\text{H}_{29}\text{N}_5\text{O}_7 + \text{H}^+]$ : 476.2140. Found 476.2122.

**6d:** 40% yield; HPLC (standard gradient):  $t_{\text{ret}} = 9.11$  min.; HRMS Calcd for  $[\text{C}_{22}\text{H}_{29}\text{N}_5\text{O}_7 + \text{H}^+]$ : 476.2140. Found 476.2136.

**6e:** 4% yield; HPLC (standard gradient):  $t_{\text{ret}} = 8.68$  min.; HRMS Calcd for  $[\text{C}_{21}\text{H}_{29}\text{N}_5\text{O}_7 + \text{H}^+]$ : 464.2140. Found 464.2145.

**6f:** 4 % yield; HPLC (standard gradient):  $t_{\text{ret}} = 9.16$  min.; HMRS Calcd for  $[\text{C}_{23}\text{H}_{31}\text{N}_5\text{O}_7 + \text{H}^+]$ : 490.2296. Found 490.2292.

**6g:** 10% yield; HPLC (standard gradient):  $t_{\text{ret}} = 8.21$  min.; HRMS Calcd for  $[\text{C}_{20}\text{H}_{27}\text{N}_5\text{O}_7 + \text{H}^+]$ : 450.1983. Found 450.1985.

**6h:** 25% yield; HPLC (standard gradient):  $t_{\text{ret}} = 7.46$  min.; HRMS Calcd for  $[\text{C}_{20}\text{H}_{27}\text{N}_5\text{O}_7 + \text{H}^+]$ : 450.1983. Found 450.1980.

**6i:** 4% yield; HPLC (standard gradient):  $t_{\text{ret}} = 7.32$  min.; HRMS Calcd for  $[\text{C}_{20}\text{H}_{26}\text{N}_6\text{O}_8 + \text{H}^+]$ : 479.1885. Found: 479.1862.

**6j:** 5% yield; HPLC (standard gradient):  $t_{\text{ret}} = 11.55$  min.; HRMS Calcd for  $[\text{C}_{28}\text{H}_{33}\text{N}_5\text{O}_9 + \text{H}^+]$ : 584.2351. Found: 584.2299.

**6k:** 17 % yield; HPLC (standard gradient):  $t_{\text{ret}} = 12.00$  min.; HRMS Calcd for  $[\text{C}_{31}\text{H}_{40}\text{N}_6\text{O}_9 + \text{H}^+]$ : 641.2930. Found: 641.2910.

**8:** 5% yield; HPLC (standard gradient):  $t_{\text{ret}} = 12.18$  min.; HRMS Calcd for  $[\text{C}_{30}\text{H}_{35}\text{N}_5\text{O}_7 + \text{H}^+]$ : 578.2609. Found 578.2607.

**10:** 4% yield; HPLC (standard gradient):  $t_{\text{ret}} = 14.45$  min. (90% pure); HRMS Calcd for  $[\text{C}_{36}\text{H}_{39}\text{N}_5\text{O}_7 + \text{Na}^+]$ : 676.2742. Found 676.2738.

## **b. Purification using silica gel column chromatography**

As stated in the manuscript, the silica gel column chromatography of poorly soluble peptides (in  $\text{CH}_2\text{Cl}_2$ ) resulted in green coloured compounds because of the presence of co-eluted copper salts. Therefore, different chelators were tested as plugs over a silica column to verify whether these salts can be retained during chromatography. Conditions were evaluated where the reaction mixture was treated (a) with a blank (no scavenger), (b) 5 equiv  $\text{Na}_4\text{EDTA}$ , (c) 5 equiv  $\text{Na}_3\text{-citrate}$  and (4) 5 equiv  $\text{Na}_3\text{PO}_4$ . The mixture was stirred for a few minutes and silica was added before the solvent was evaporated. This resulted in blue-green coated silica which was afterwards brought onto the purification column. As can be seen from the figure below, only the use of  $\text{Na}_3\text{PO}_4$  as scavenger gave good results.

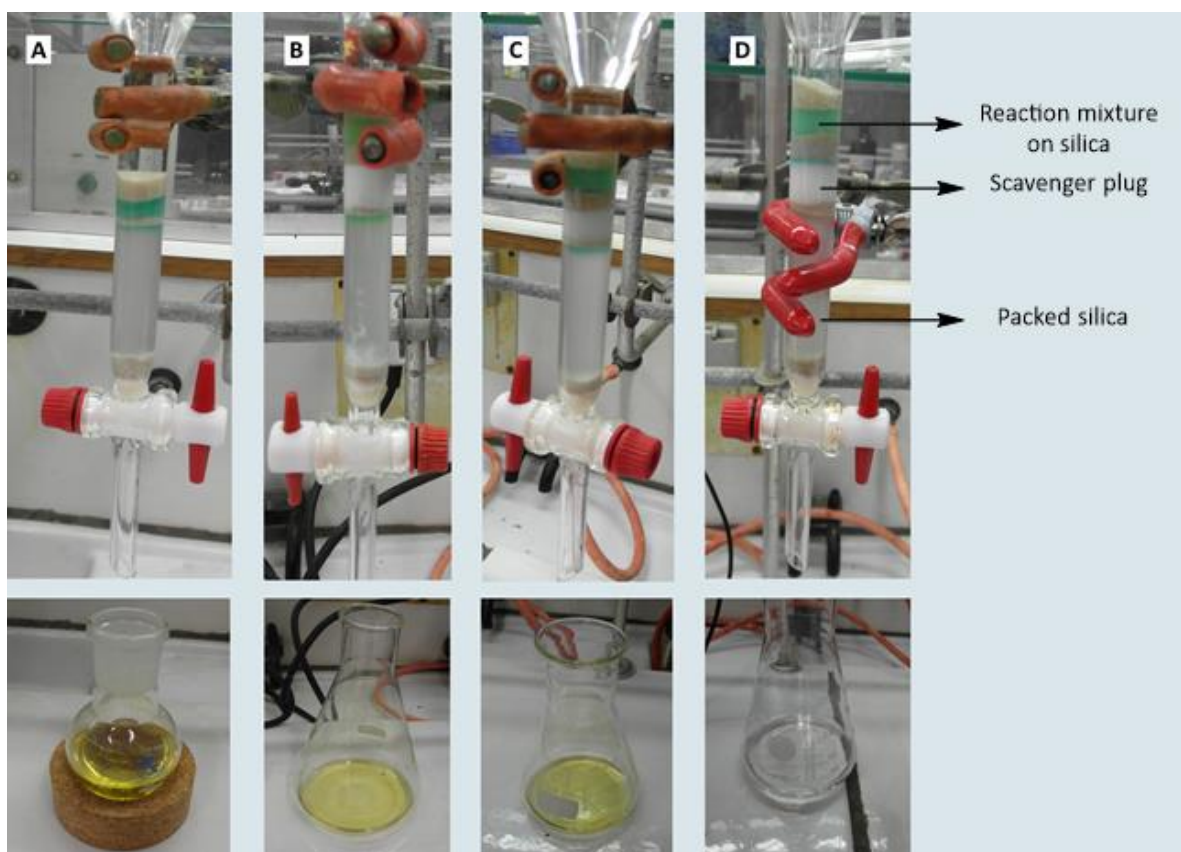

**Scheme 0.1.** Different scavengers tested to complex the Cu- and Ni-salts; A = blank, B =  $\text{Na}_4\text{EDTA}$ , C =  $\text{Na}_3\text{-citrate}$  and D =  $\text{Na}_3\text{PO}_4$ .

In a control experiment, the effect of  $\text{Na}_3\text{PO}_4$  on complexing the copper salts was demonstrated. In the figure below (left) the reaction mixture containing the Cu- and Ni-salts is compared to the same solution but treated with 5 equiv of  $\text{Na}_3\text{PO}_4$ . It can be seen that the  $\text{Na}_3\text{PO}_4$  is responsible for clearing the supernatant solution from the excess of coloured salts.

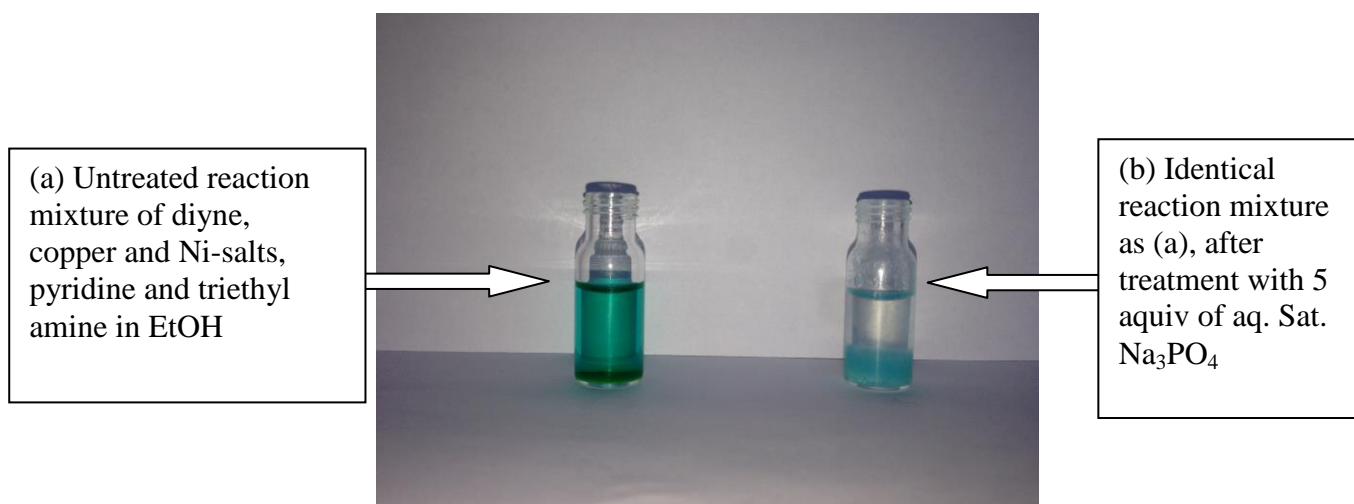

(a) Untreated reaction mixture of diyne, copper and Ni-salts, pyridine and triethyl amine in EtOH

(b) Identical reaction mixture as (a), after treatment with 5 equiv of aq. Sat.  $\text{Na}_3\text{PO}_4$

The use of silica gel column chromatography as purification method was demonstrated for peptide derivatives **6a**, **6c**, **6e**, **6g**, **6i**, **8** and **10** which gave low yield via RP preparative HPLC. The mixture was treated with 5 equiv of  $\text{Na}_3\text{PO}_4$  (as aq. sat. solution) during 15 minutes. Afterwards the mixture was concentrated, loaded on a plug of silica gel (2cm, diameter 0.5cm) and eluted using 20% MeOH in  $\text{CH}_2\text{Cl}_2$ . After evaporation in vacuo, 5mL of hexane

was added and the mixture was left without stirring to remove traces of pyridine. After decanting the hexane, the remaining solids were further evaporated at high vacuum (0,1 mbar) resulting in cyclic peptides as white solids.

**6a** 68% yield; TLC (silica, 20% MeOH in CH<sub>2</sub>Cl<sub>2</sub>): R<sub>f</sub> = 0.29. HPLC (standard gradient): t<sub>ret</sub> = 9.46 min.

**6c** 66% yield; TLC (silica, 20% MeOH in CH<sub>2</sub>Cl<sub>2</sub>): R<sub>f</sub> = 0.22. HPLC (standard gradient): t<sub>ret</sub> = 9.02 min.

**6e** 48% yield; TLC (silica, 20% MeOH in CH<sub>2</sub>Cl<sub>2</sub>): R<sub>f</sub> = 0.15. HPLC (standard gradient): t<sub>ret</sub> = 8.68 min.

**6g** 45% yield; TLC (silica, 20% MeOH in CH<sub>2</sub>Cl<sub>2</sub>): R<sub>f</sub> = 0.12. HPLC (standard gradient): t<sub>ret</sub> = 8.21 min.

**6i** 61% yield; TLC (silica, 20% MeOH in CH<sub>2</sub>Cl<sub>2</sub>): R<sub>f</sub> = 0.05. HPLC (standard gradient): t<sub>ret</sub> = 7.32 min.

**8** 54% yield; TLC (silica, 20% MeOH in CH<sub>2</sub>Cl<sub>2</sub>): R<sub>f</sub> = 0.29. HPLC (standard gradient): t<sub>ret</sub> = 12.18 min.

**10** 76% yield; TLC (silica, 20% MeOH in CH<sub>2</sub>Cl<sub>2</sub>): R<sub>f</sub> = 0.31. HPLC (standard gradient): t<sub>ret</sub> = 14.45 min.

### c. Solid phase cyclisation of peptide **5a**

Compound **5a** was synthesised on solid phase via the general procedure for SPPS. However, instead of acetylating the amine terminus, cleaving the peptide from the resin and purifying the acyclic peptide via preparative HPLC, the solid supported *N*-Fmoc protected peptide was directly cyclised on solid phase using a BIOTAGE Initiator<sup>+</sup> SP Microwave Synthesizer. Cu(OAc)<sub>2</sub>.H<sub>2</sub>O (1 equiv.), NiCl<sub>2</sub> (1 equiv.), Et<sub>3</sub>N (3 equiv.) and pyridine (5 equiv.) were dissolved in CHCl<sub>3</sub> (1 ml) and added to the resin (50 mg). After reaction for 30min at 50 °C in the microwave, 90% conversion towards the cyclic peptide is observed according to HPLC and LC-MS. As a sideproduct, dimer **6a'** is formed in 10%, according to HPLC and LC-MS.

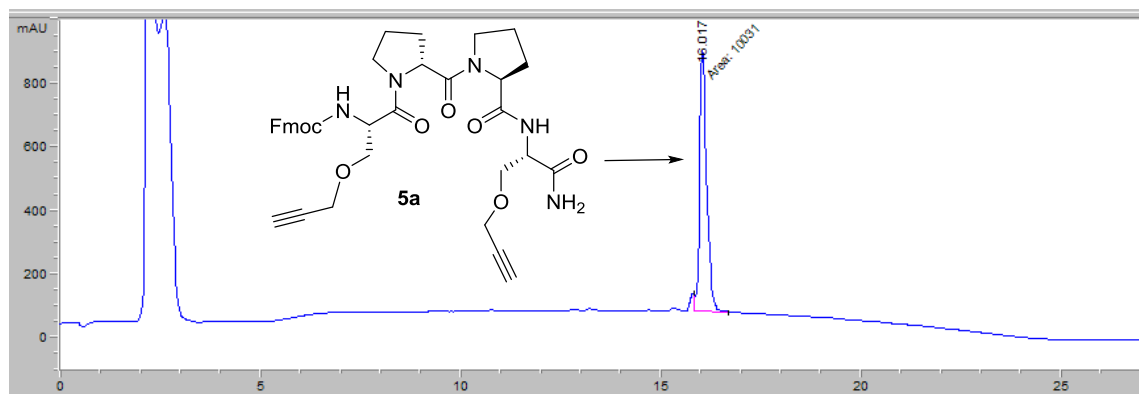

**Figure 1a:** HPLC chromatogram of crude starting material **5a**

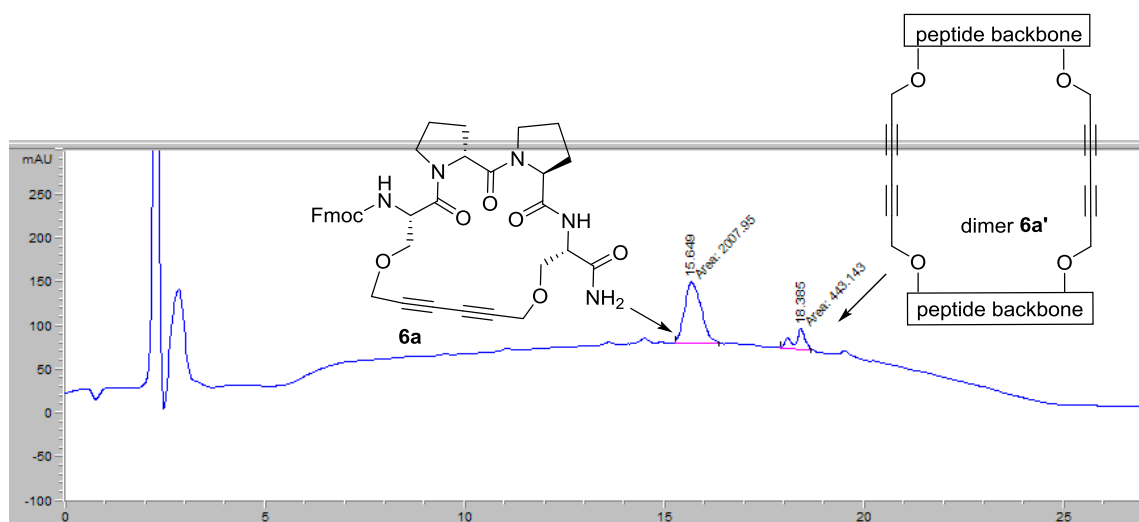

**Figure 1b:** HPLC chromatogram of the crude reaction mixture of the solid phase cyclisation for peptide **5a**

6. Copies of  $^1\text{H}$  and  $^{13}\text{C}$  NMR of compounds 1, 2, 12, 13a, 14a, 15a, 17, 18, 20-24 and ROESY NMR of compounds 13a, 14a and 15a

1a

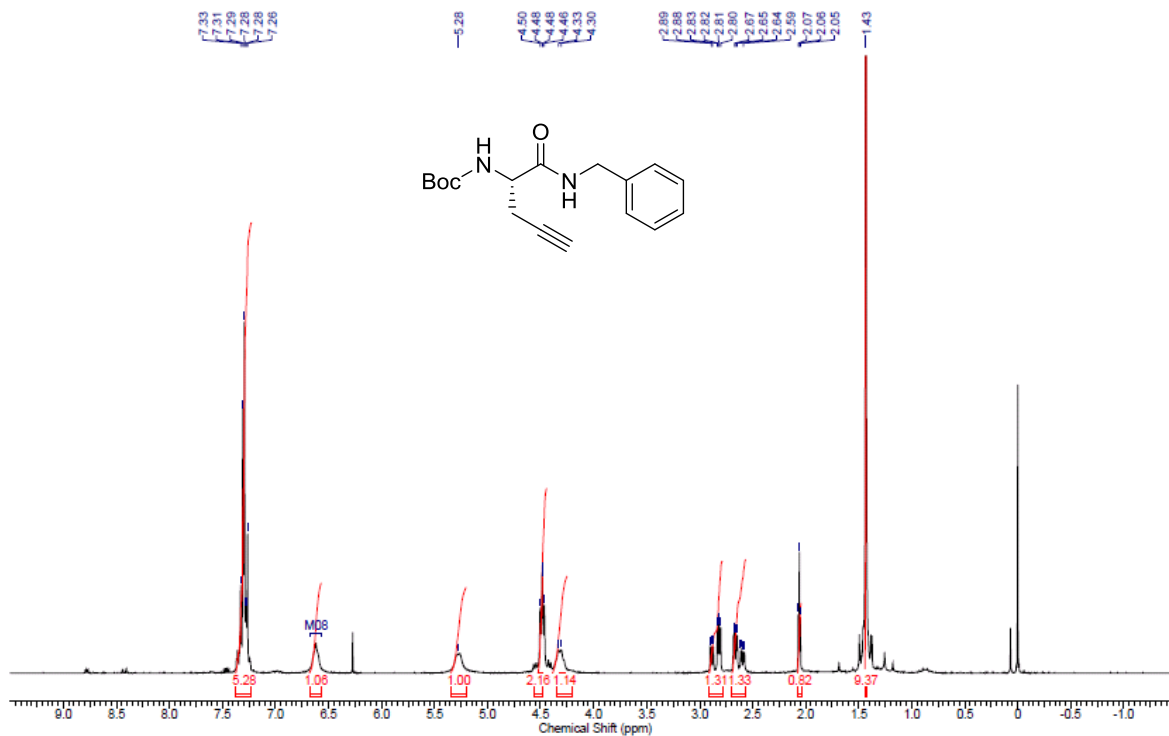

Figure 2:  $^1\text{H}$  NMR spectrum of 1a (250 MHz,  $\text{CDCl}_3$ )

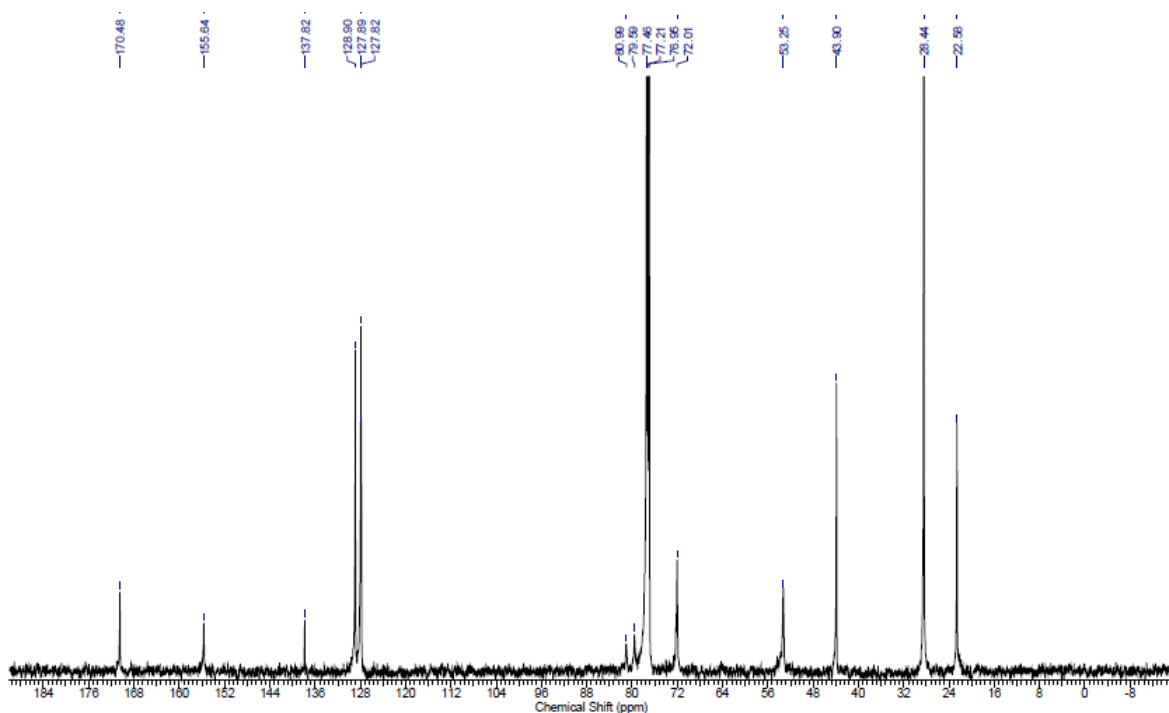

Figure 3:  $^{13}\text{C}$  NMR spectrum of 1a (126 MHz,  $\text{CDCl}_3$ )

1b

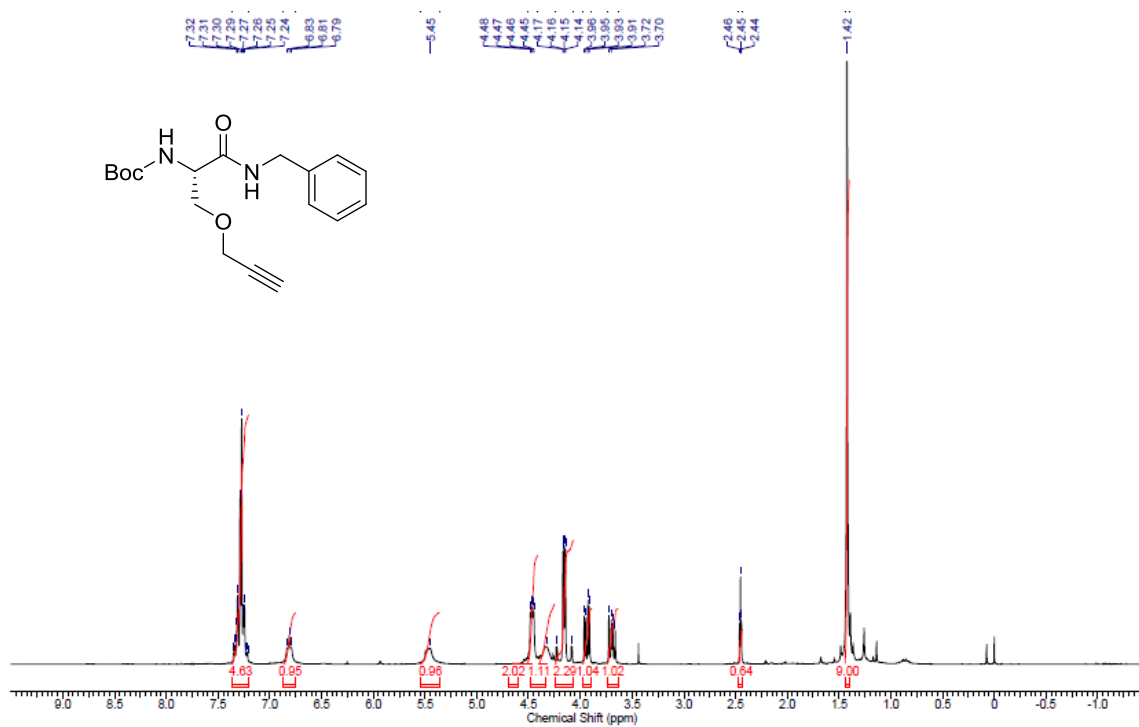

Figure 4: <sup>1</sup>H NMR spectrum of 1b (250 MHz, CDCl<sub>3</sub>)

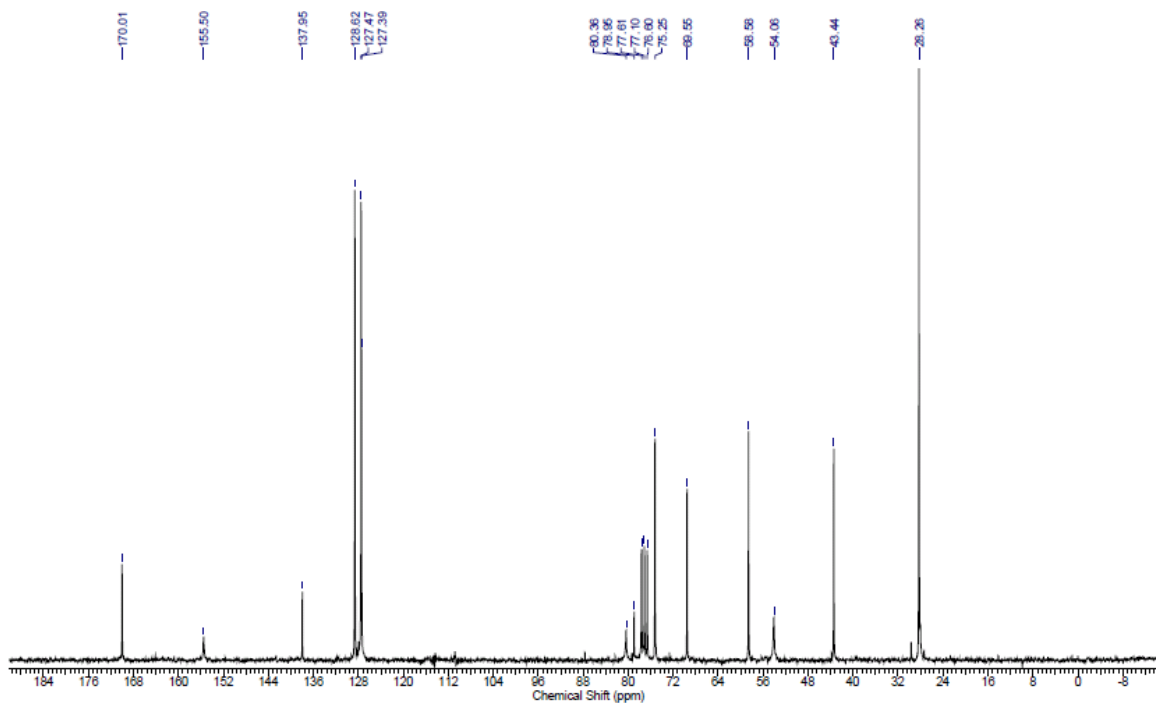

Figure 5: <sup>13</sup>C NMR spectrum of 1b (63 MHz, CDCl<sub>3</sub>)

2a

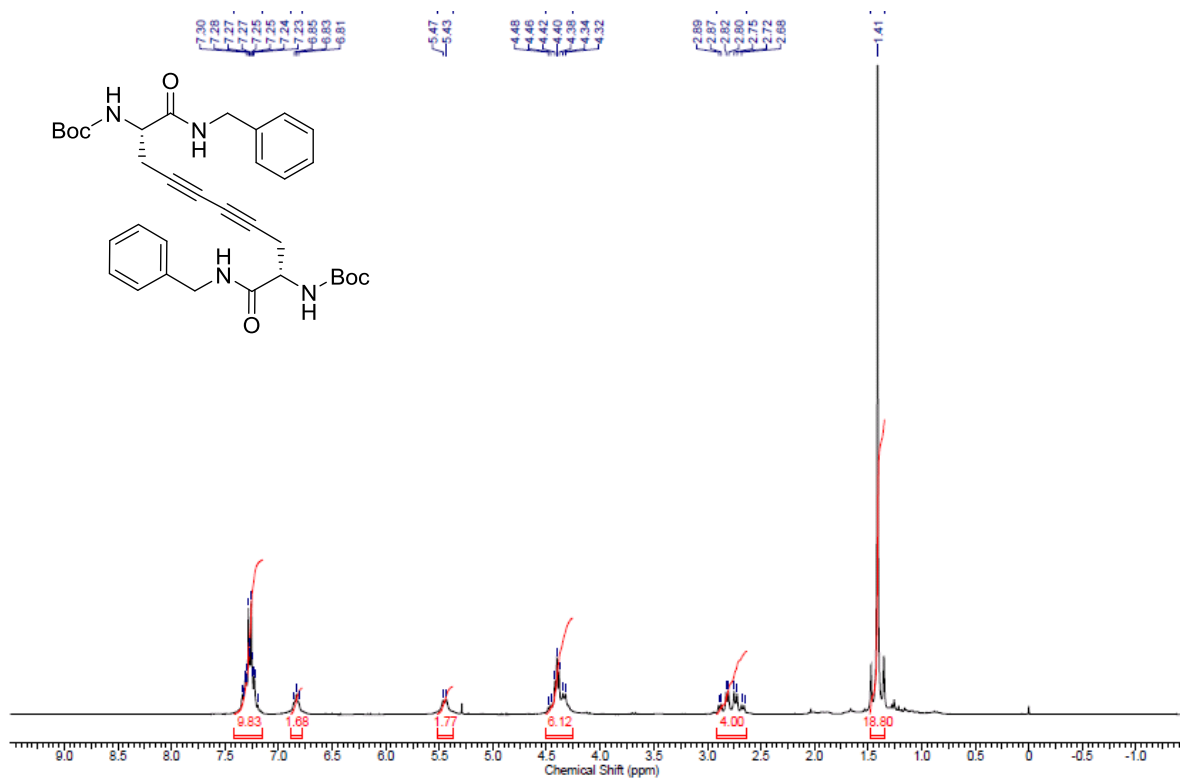

Figure 6: <sup>1</sup>H NMR spectrum of 2a (250 MHz, CDCl<sub>3</sub>)

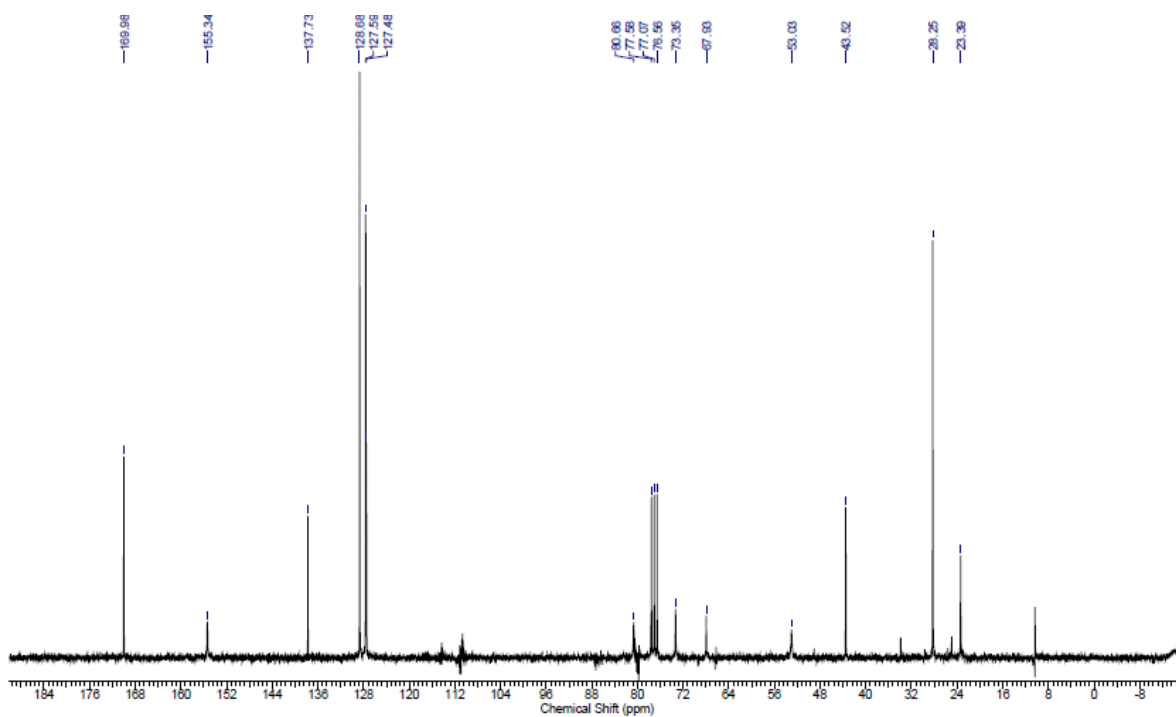

Figure 7: <sup>13</sup>C NMR spectrum of 2a (63 MHz, CDCl<sub>3</sub>)



2b

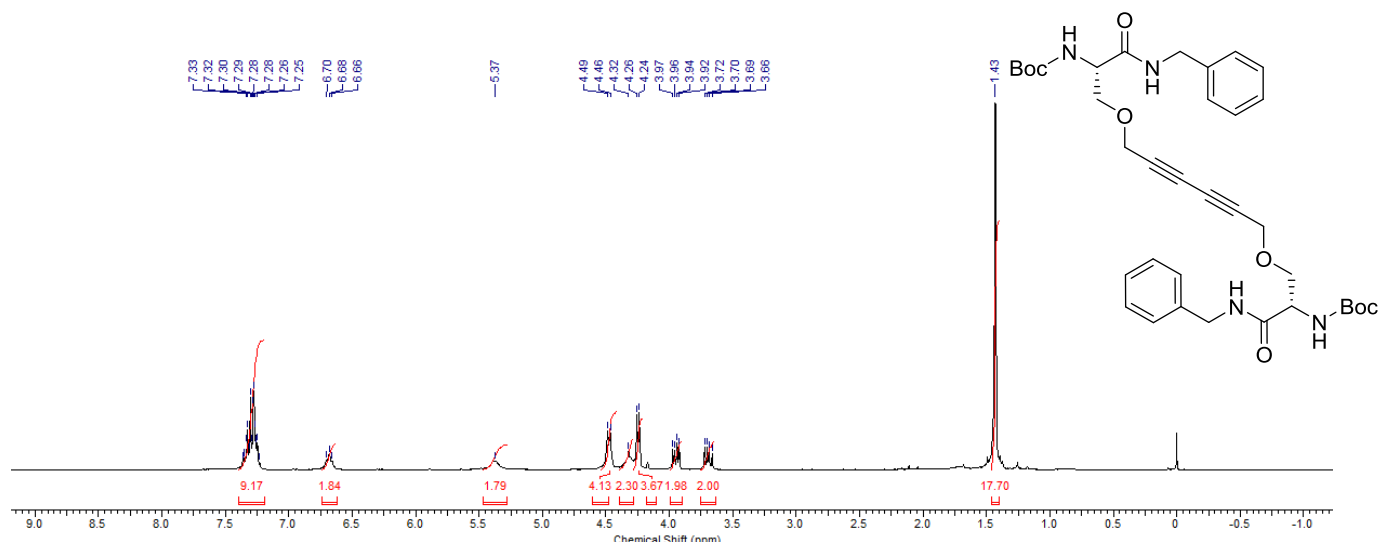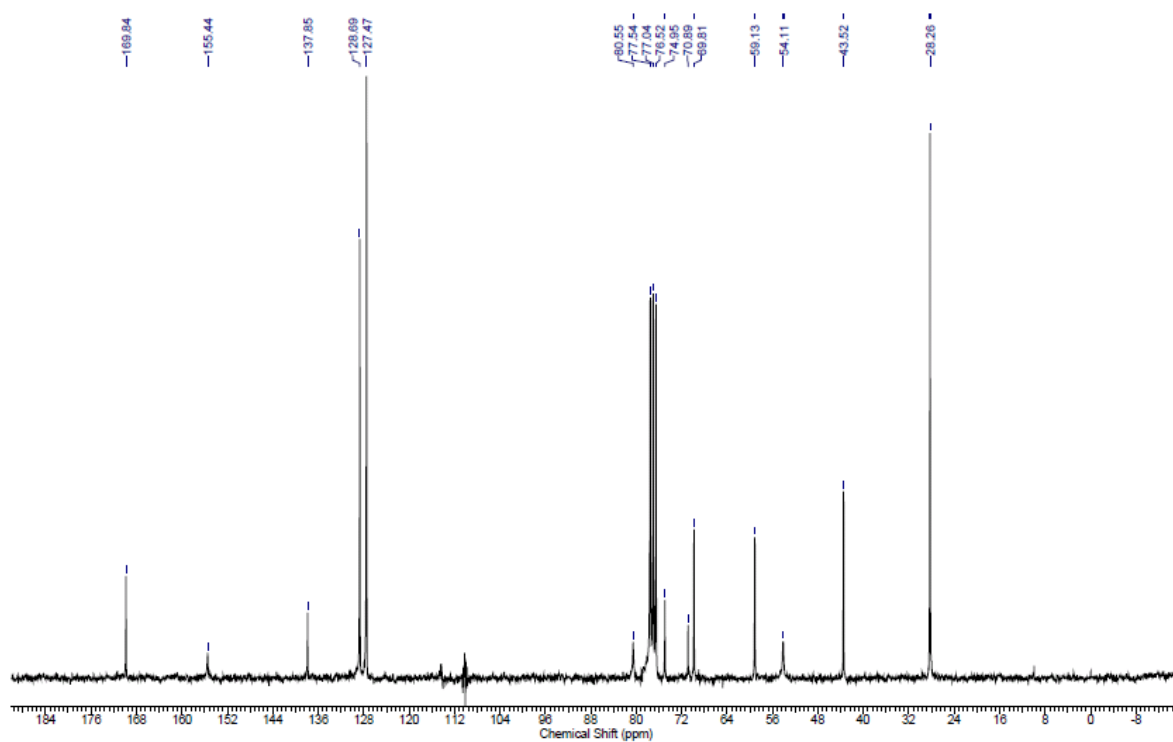

17

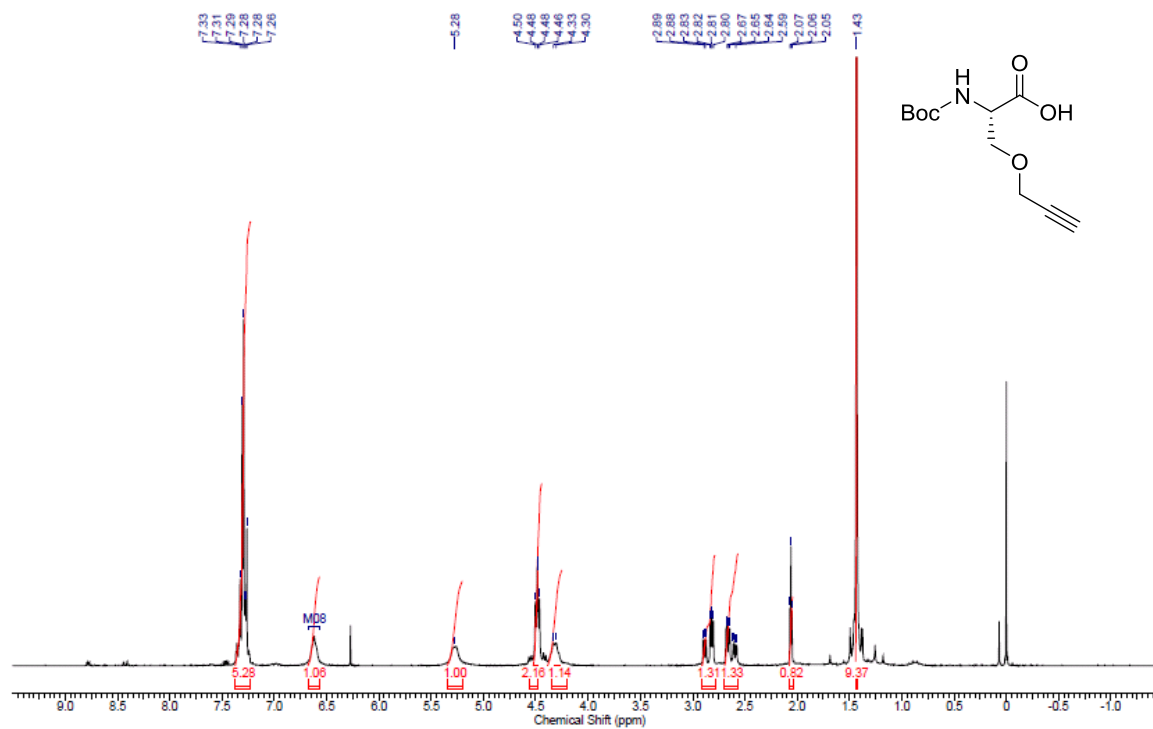

Figure 10: <sup>1</sup>H NMR spectrum of **17** (250 MHz, CDCl<sub>3</sub>)

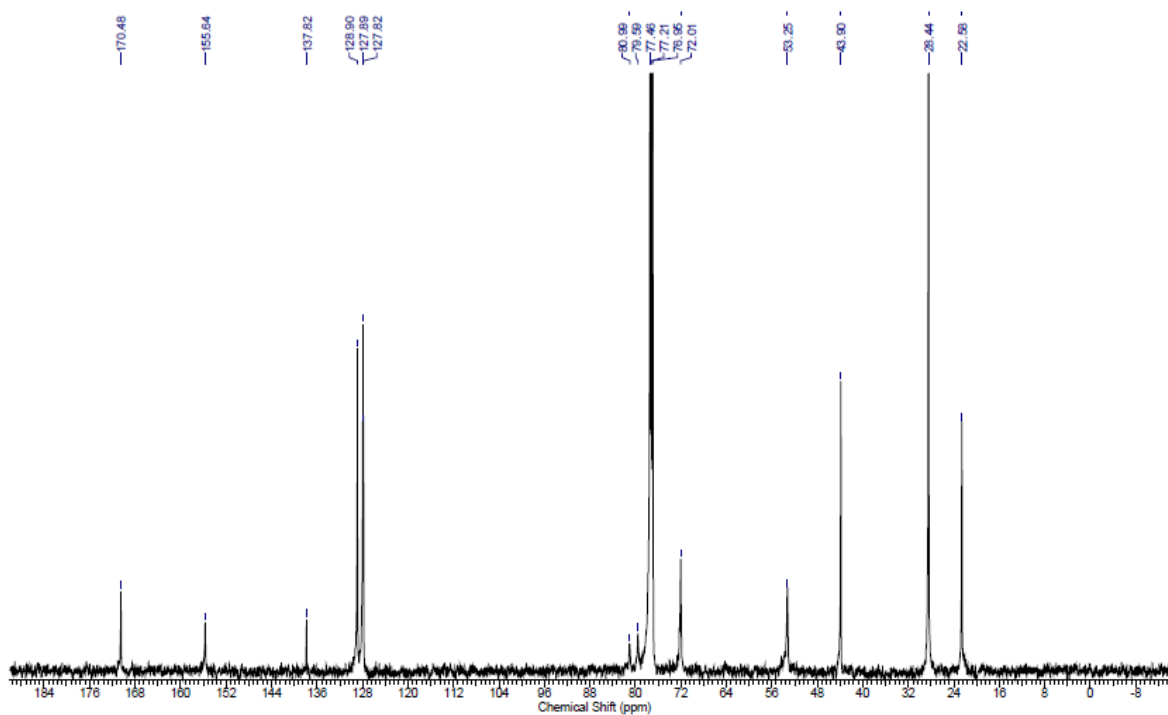

Figure 11: <sup>13</sup>C NMR spectrum of **17** (63 MHz, CDCl<sub>3</sub>)



20

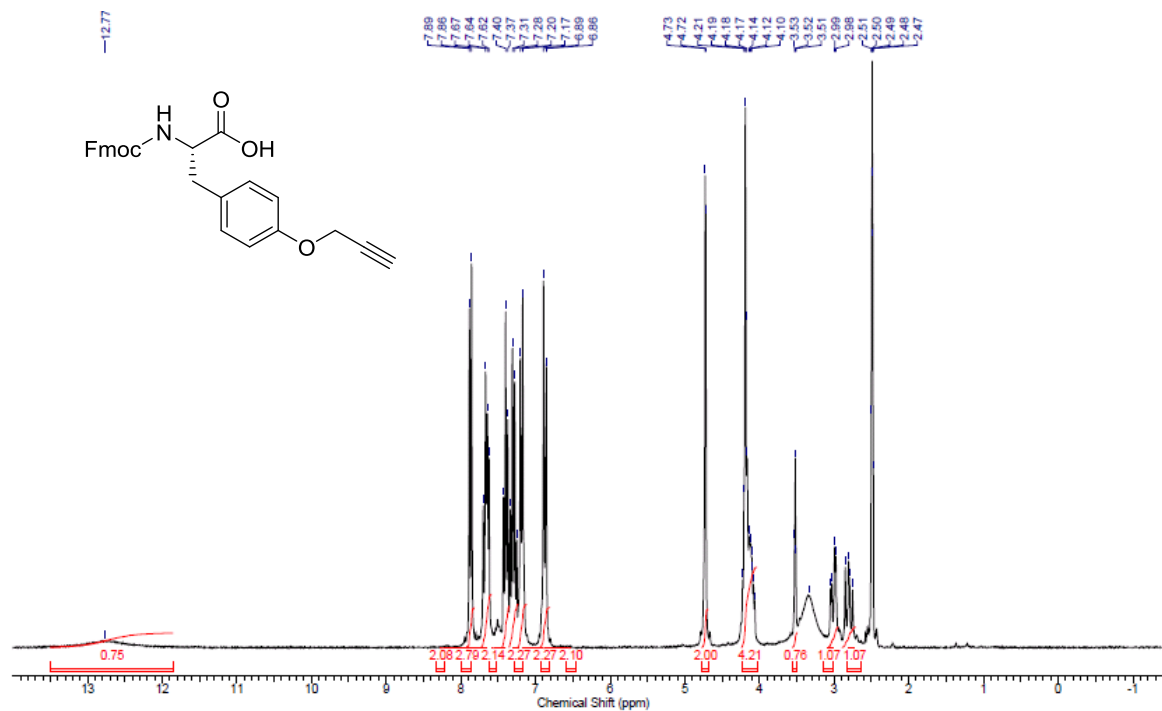

Figure 14: <sup>1</sup>H NMR spectrum of **20** (250 MHz, DMSO-d<sub>6</sub>)

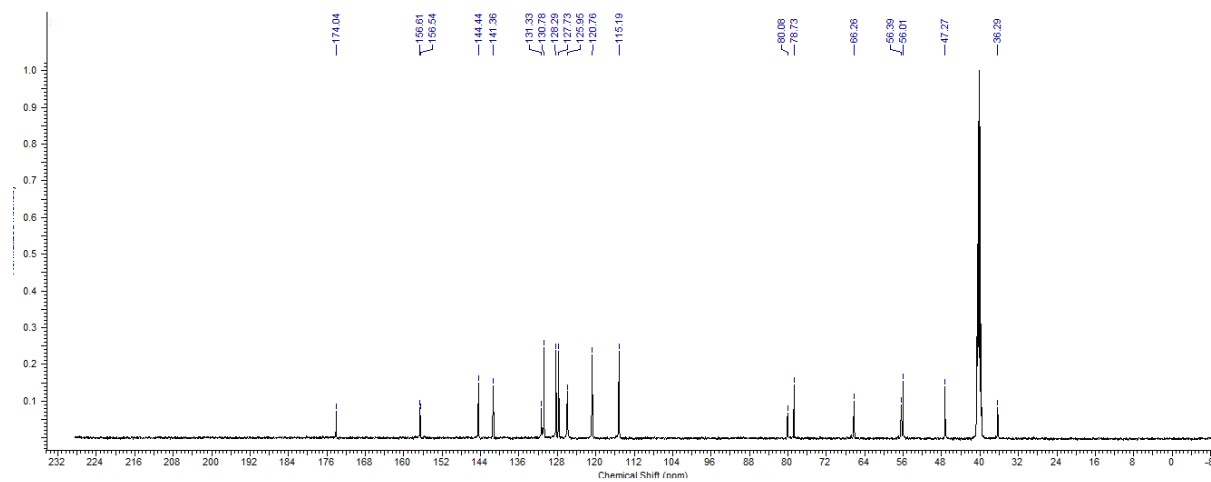

Figure 15: <sup>13</sup>C NMR spectrum of **20** (126 MHz, DMSO-d<sub>6</sub>)

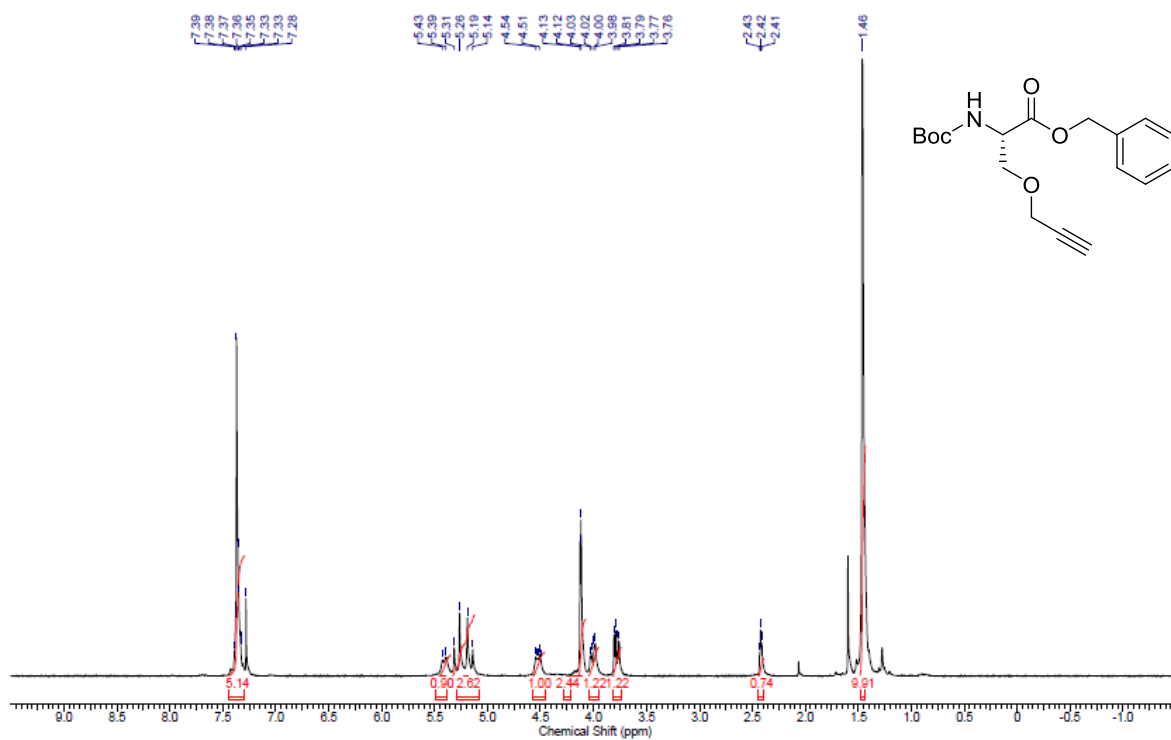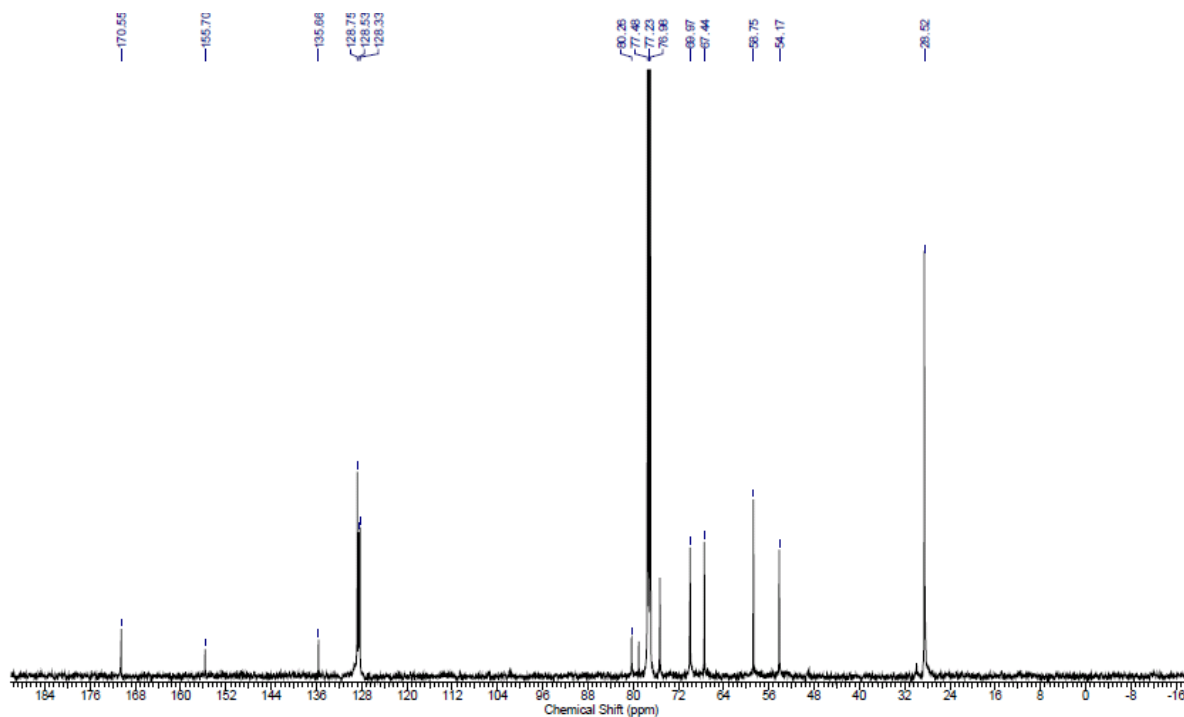

24a

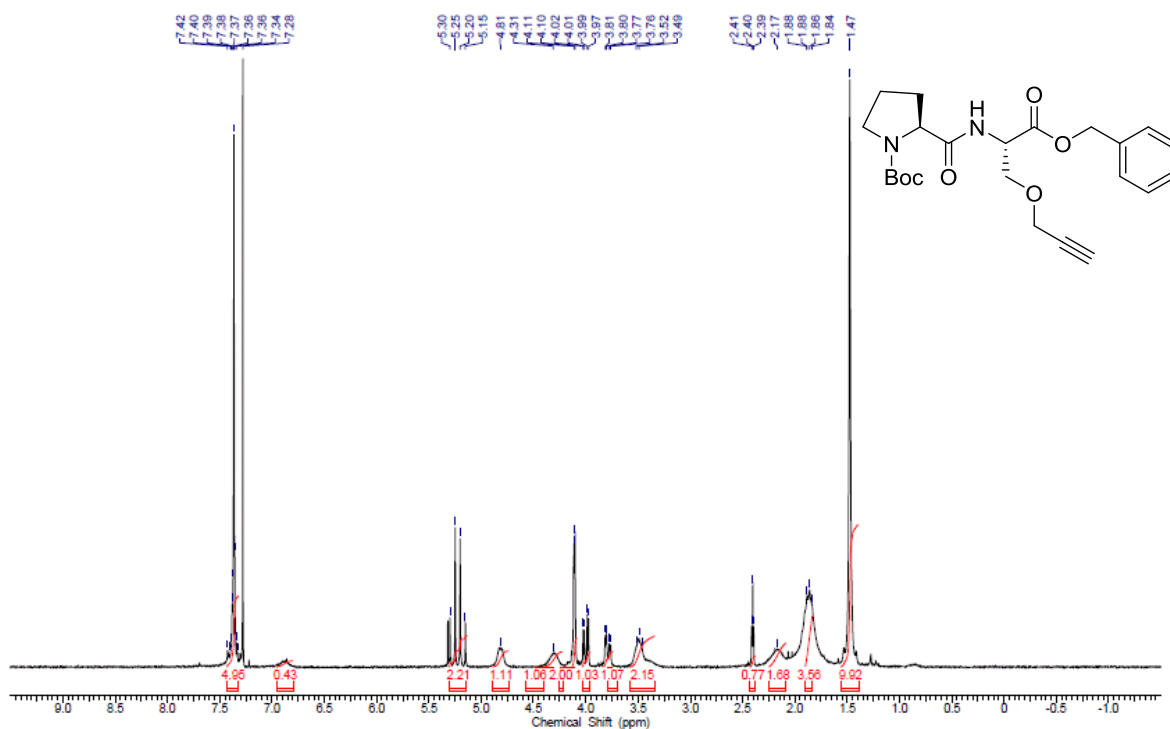

Figure 18:  $^1\text{H}$  NMR spectrum of **24a** (250 MHz,  $\text{CDCl}_3$ )

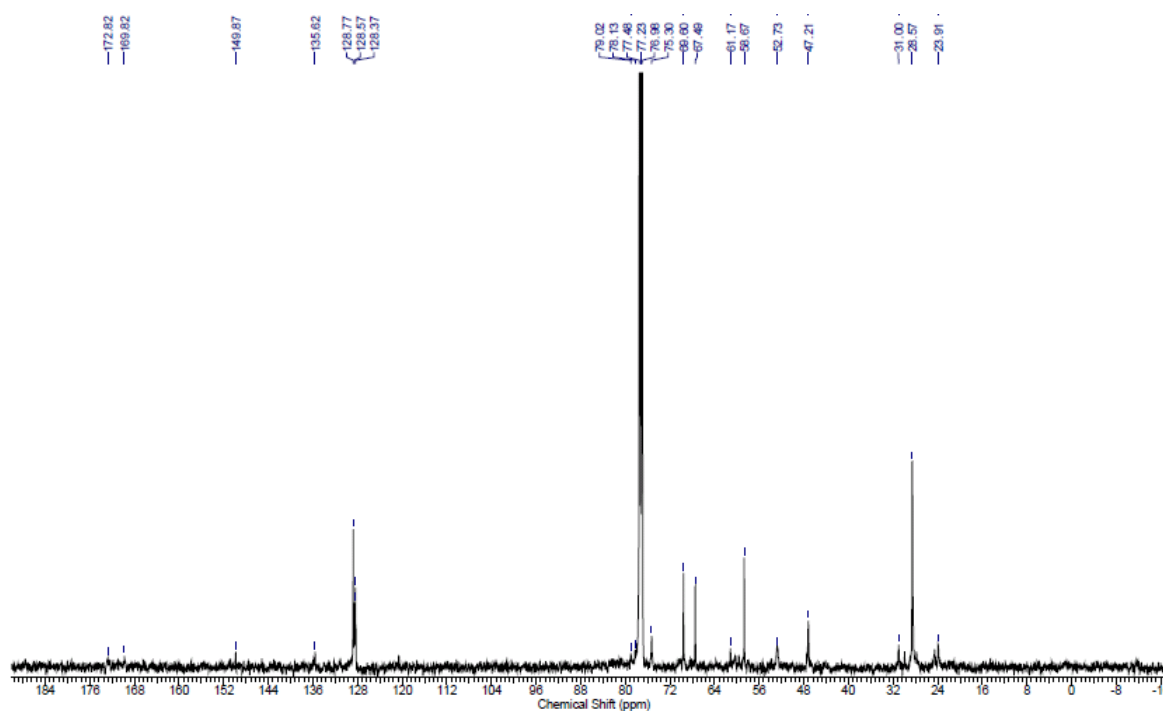

Figure 19:  $^{13}\text{C}$  NMR spectrum of **24a** (126 MHz,  $\text{CDCl}_3$ )

24b

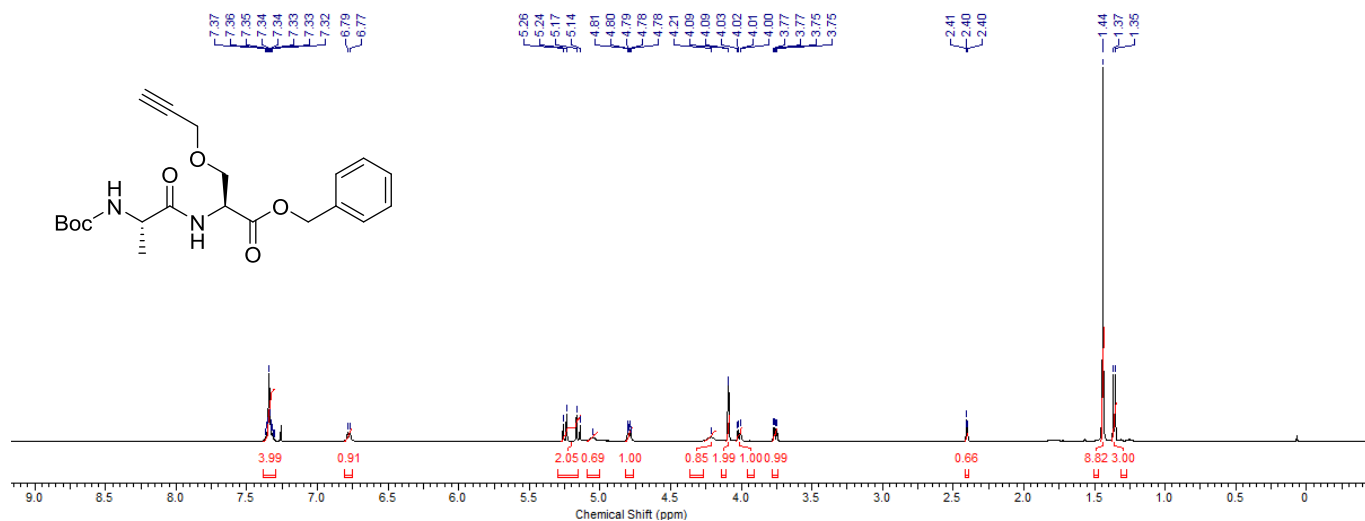

Figure 20: <sup>1</sup>H NMR spectrum of 24b (250 MHz, CDCl<sub>3</sub>)

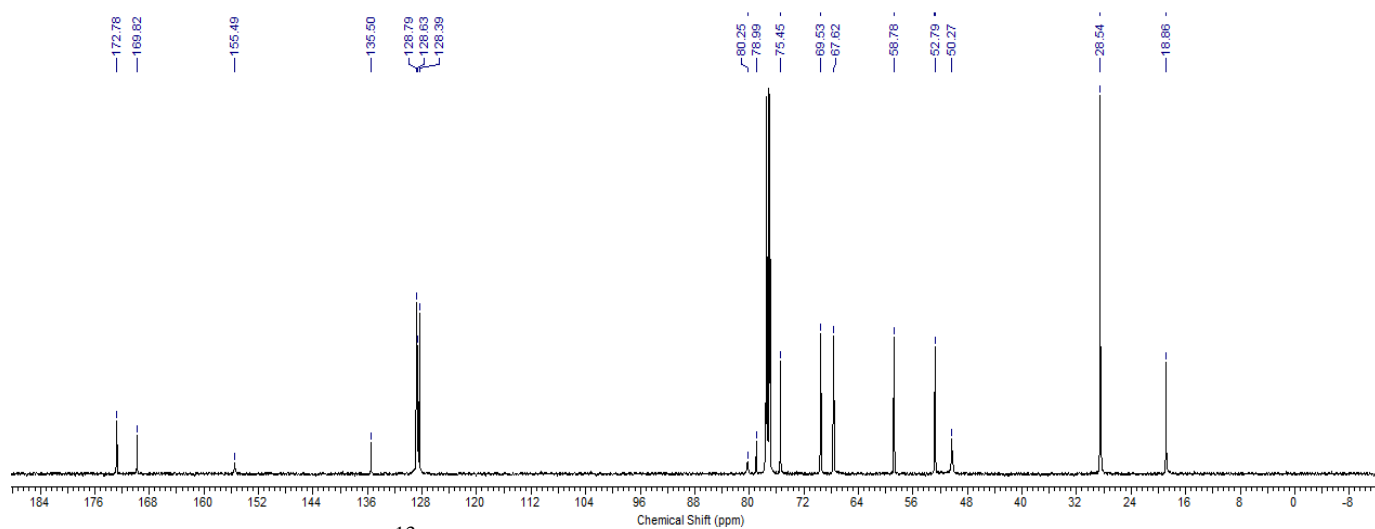

Figure 21: <sup>13</sup>C NMR spectrum of 24b (126 MHz, CDCl<sub>3</sub>)

21

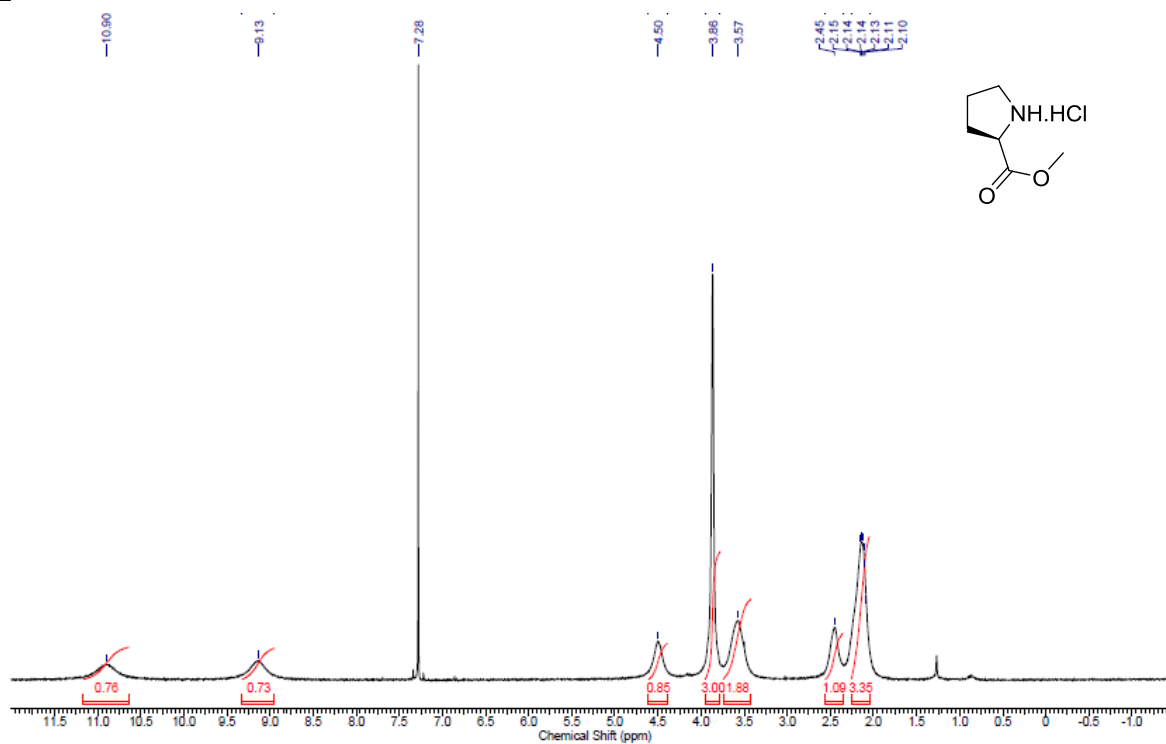

Figure 22:  $^1\text{H}$  NMR spectrum of **21** (250 MHz,  $\text{CDCl}_3$ )

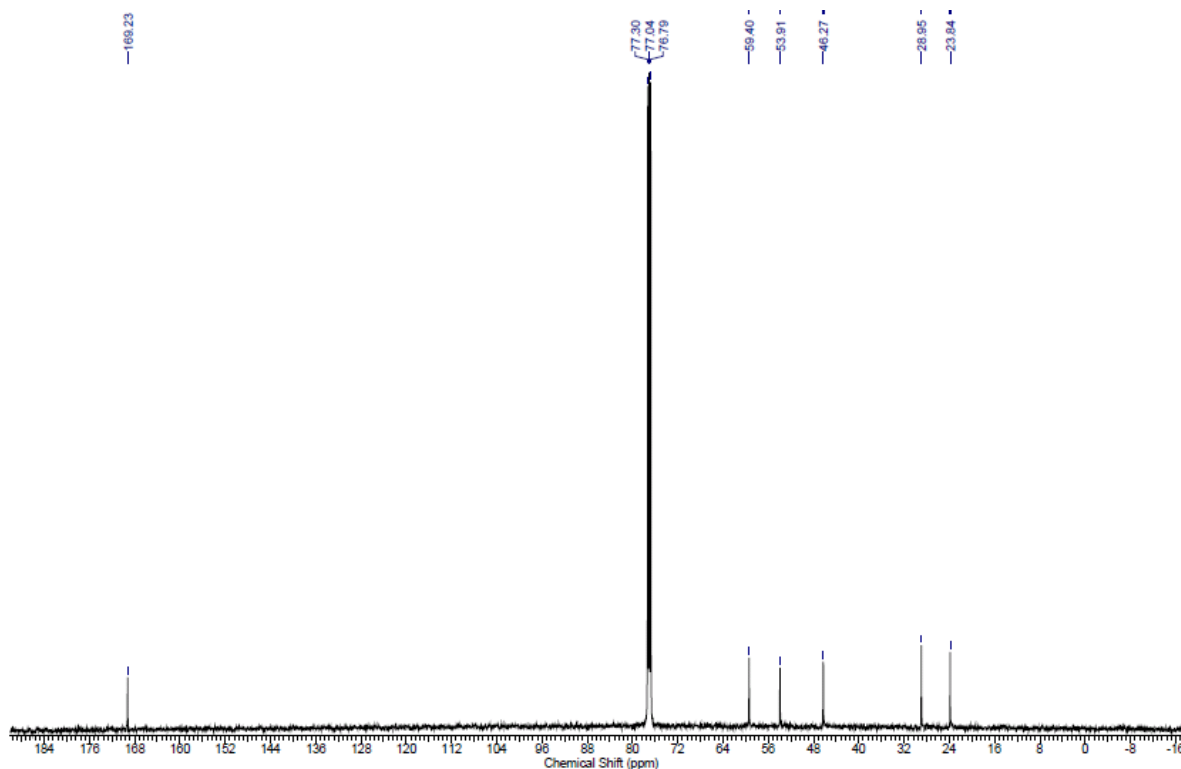

Figure 23:  $^{13}\text{C}$  NMR spectrum of **21** (63 MHz,  $\text{CDCl}_3$ )



22a

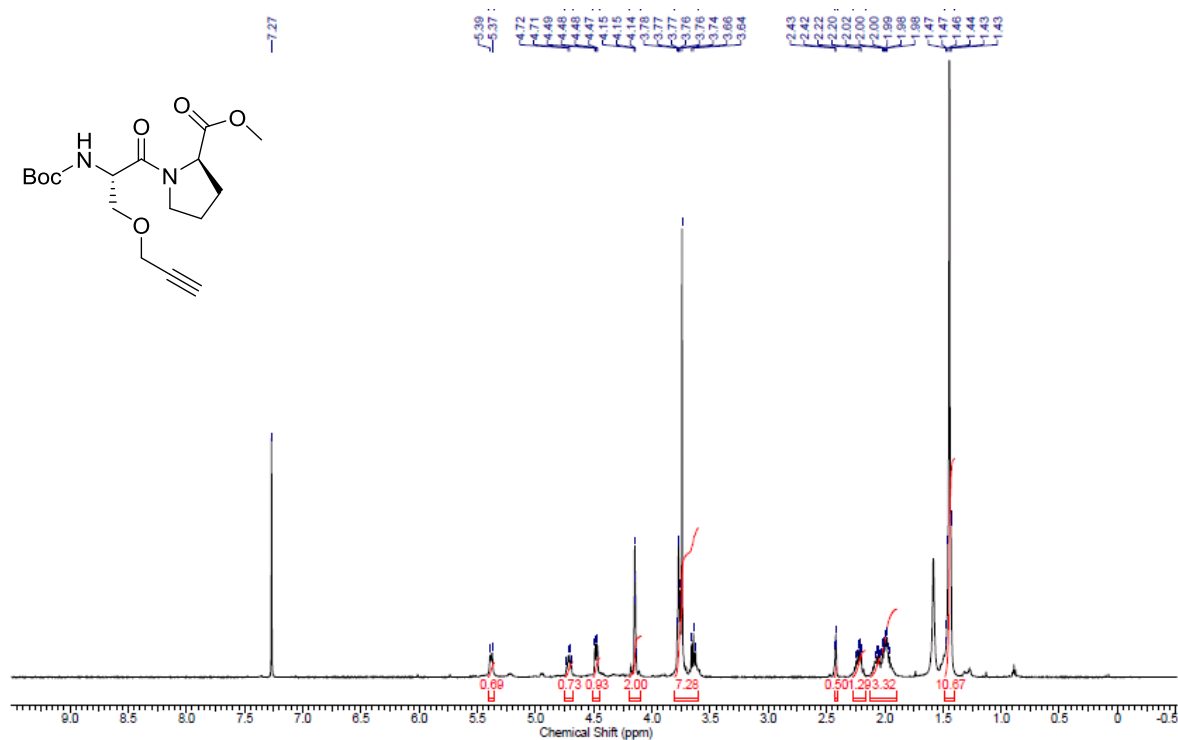

Figure 24: <sup>1</sup>H NMR spectrum of 22a (500 MHz, CDCl<sub>3</sub>)

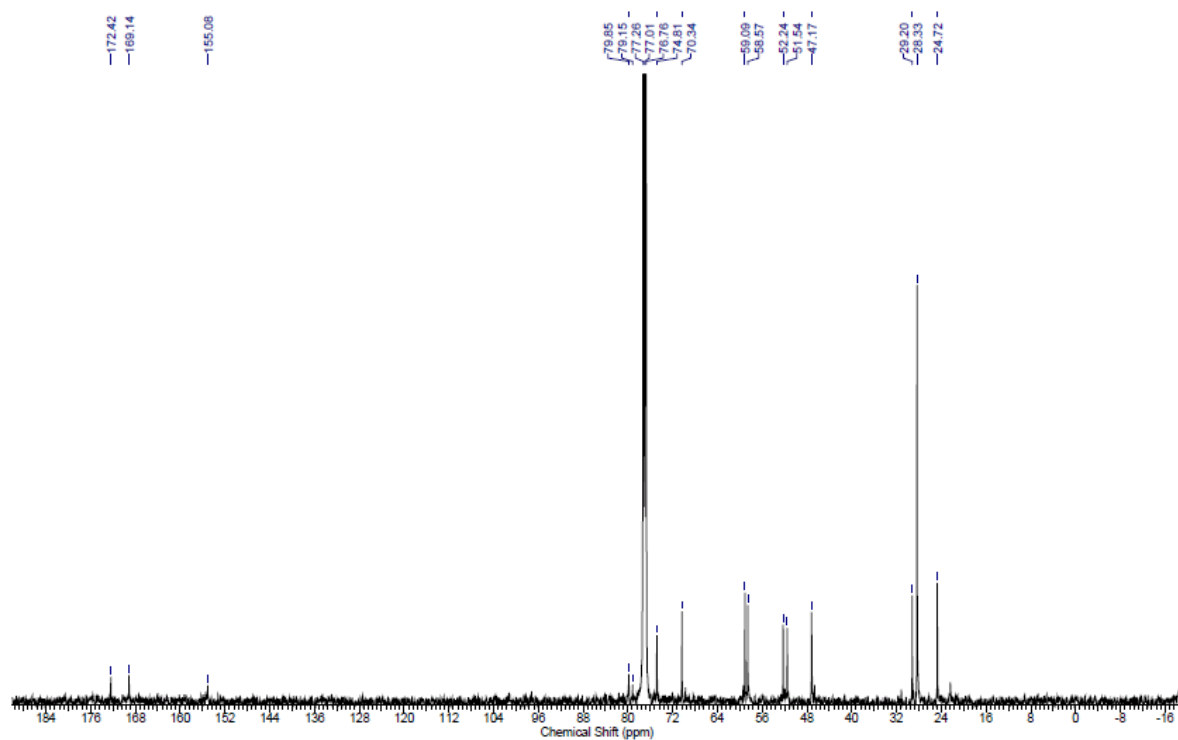

Figure 25: <sup>13</sup>C NMR spectrum of 22a (126 MHz, CDCl<sub>3</sub>)

22b

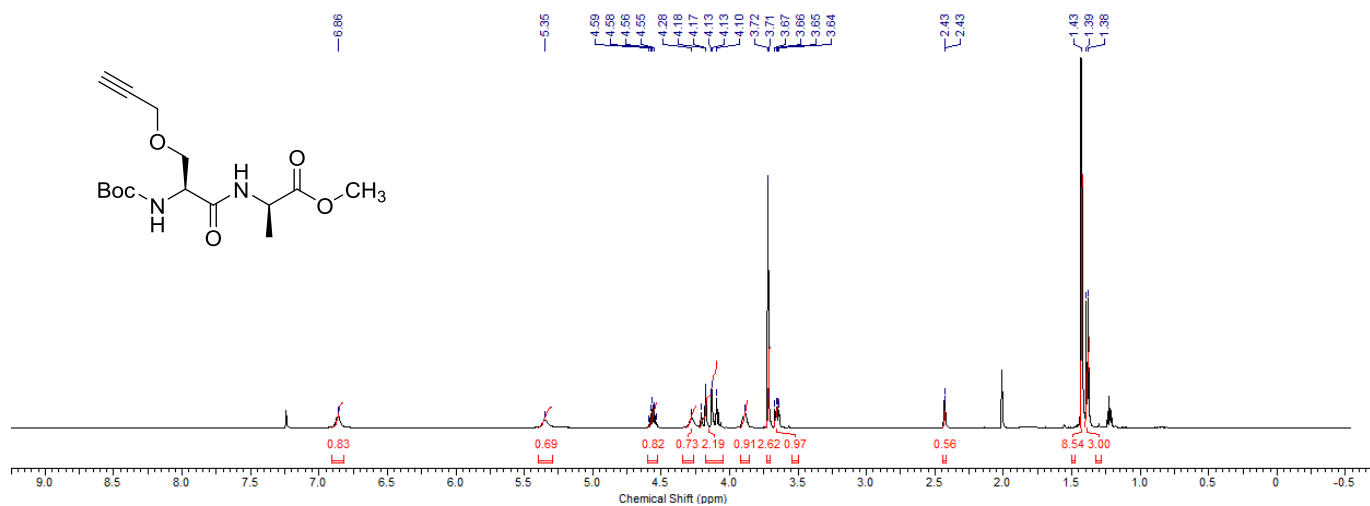

Figure 26: <sup>1</sup>H NMR spectrum of 22b (500 MHz, CDCl<sub>3</sub>)

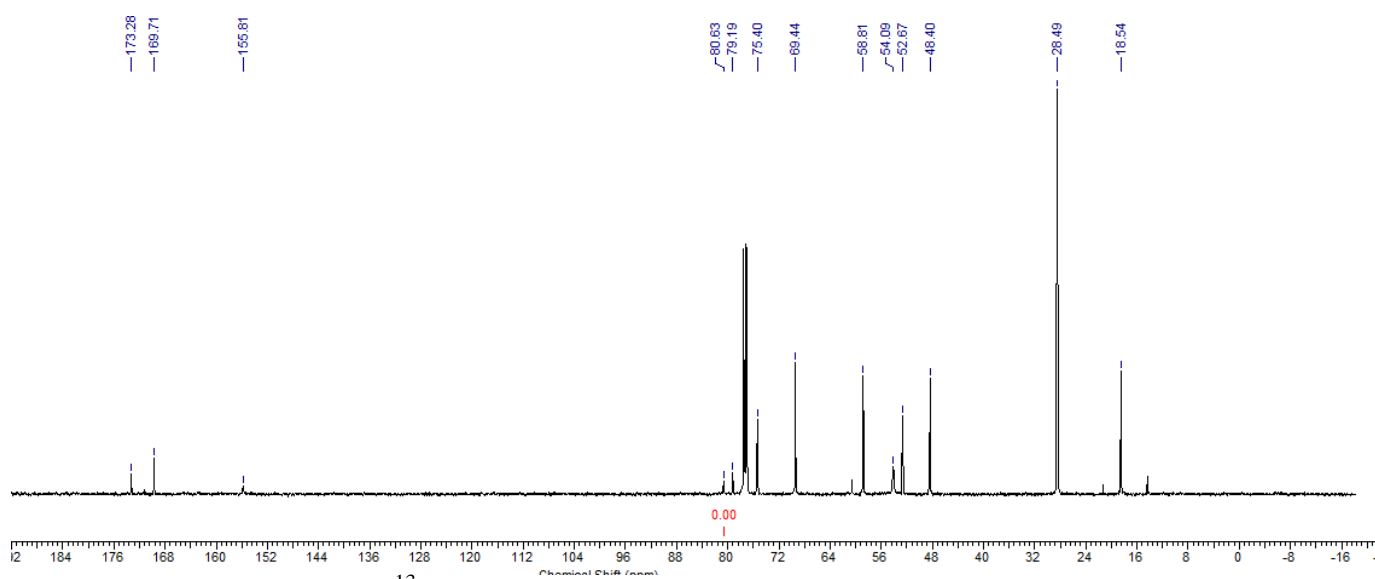

Figure 27: <sup>13</sup>C NMR spectrum of 22b (126 MHz, CDCl<sub>3</sub>)

12a

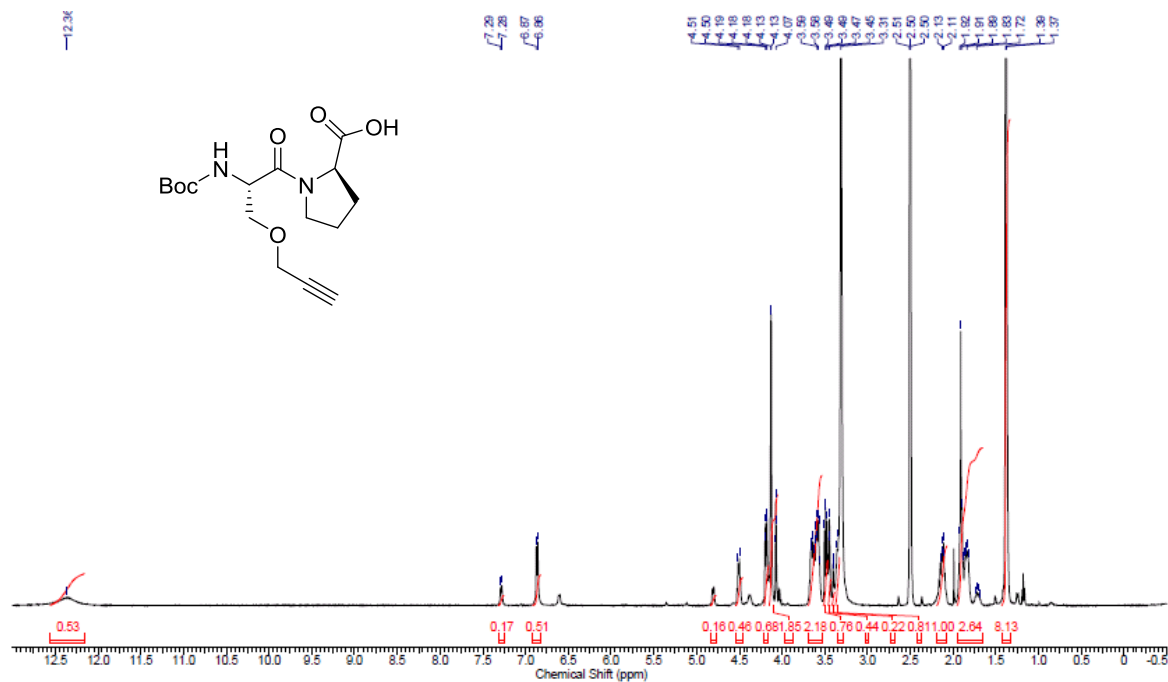

Figure 28: <sup>1</sup>H NMR spectrum of 12a (500 MHz, DMSO-d<sub>6</sub>)

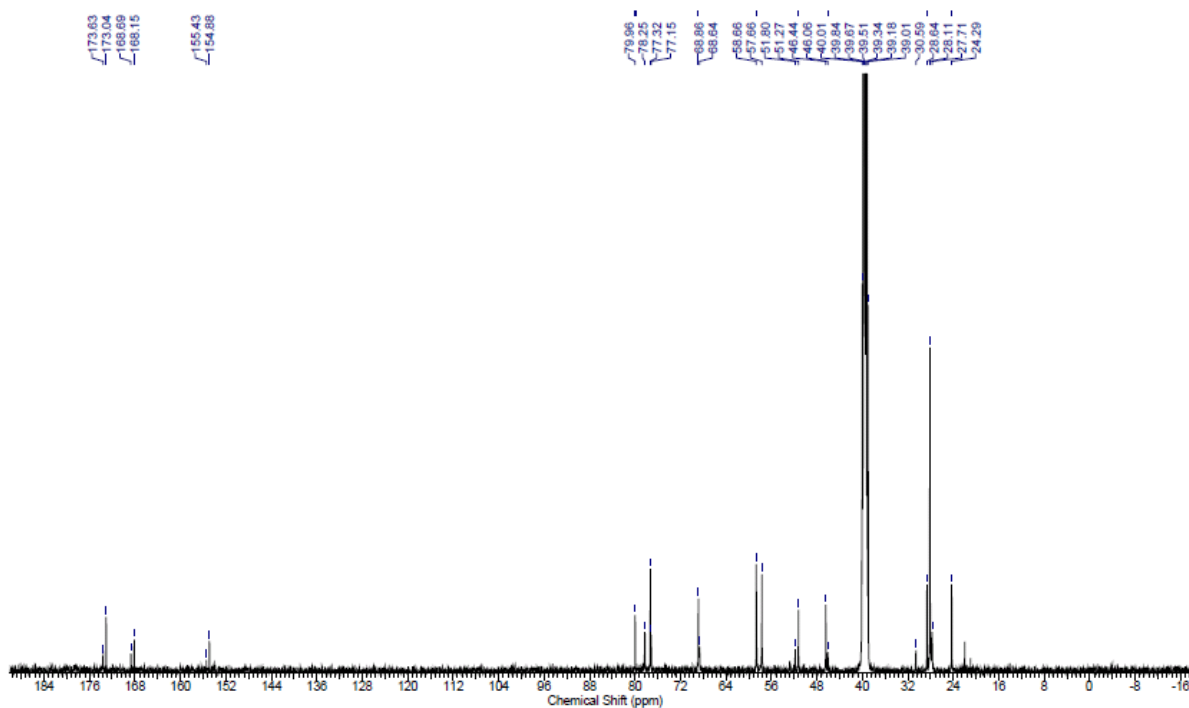

Figure 29: <sup>13</sup>C NMR spectrum of 12a (126 MHz, DMSO-d<sub>6</sub>)

12b

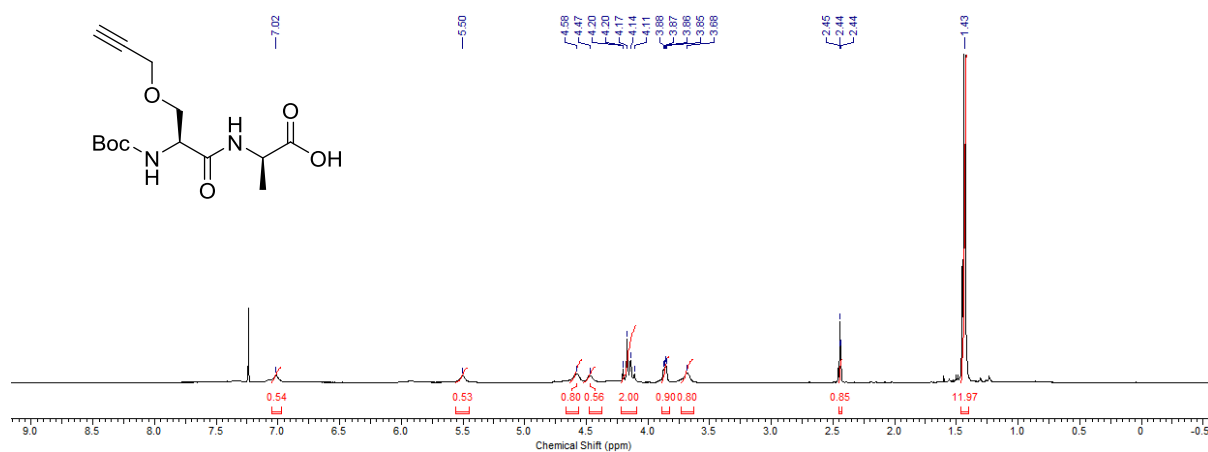

Figure 30: <sup>1</sup>H NMR spectrum of 12a (500 MHz, CDCl<sub>3</sub>)

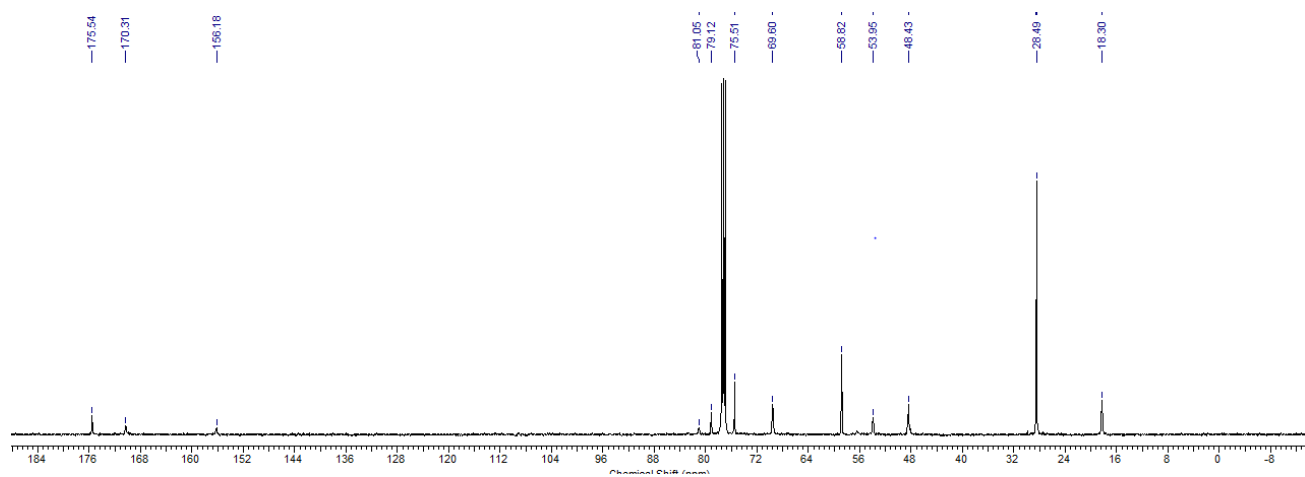

Figure 31: <sup>13</sup>C NMR spectrum of 12a (126 MHz, CDCl<sub>3</sub>)

13a

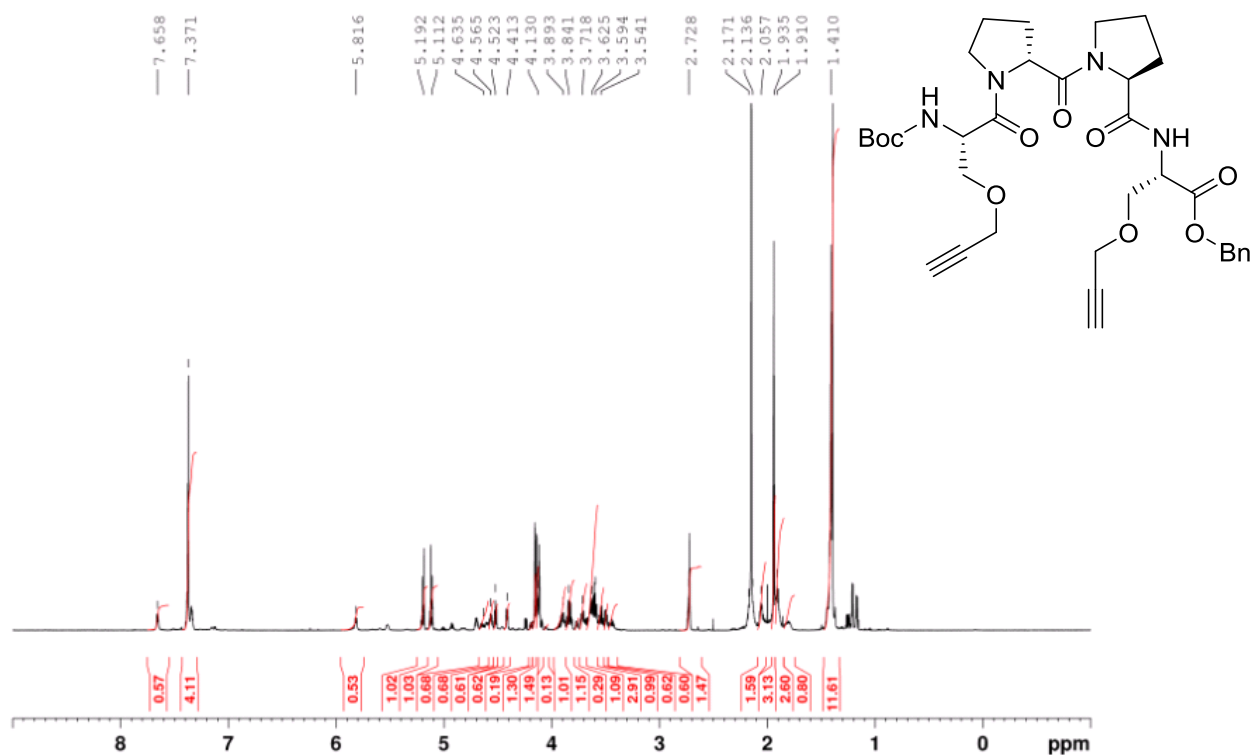

Figure 32: <sup>1</sup>H spectrum of 13a (700 MHz, CD<sub>3</sub>CN)

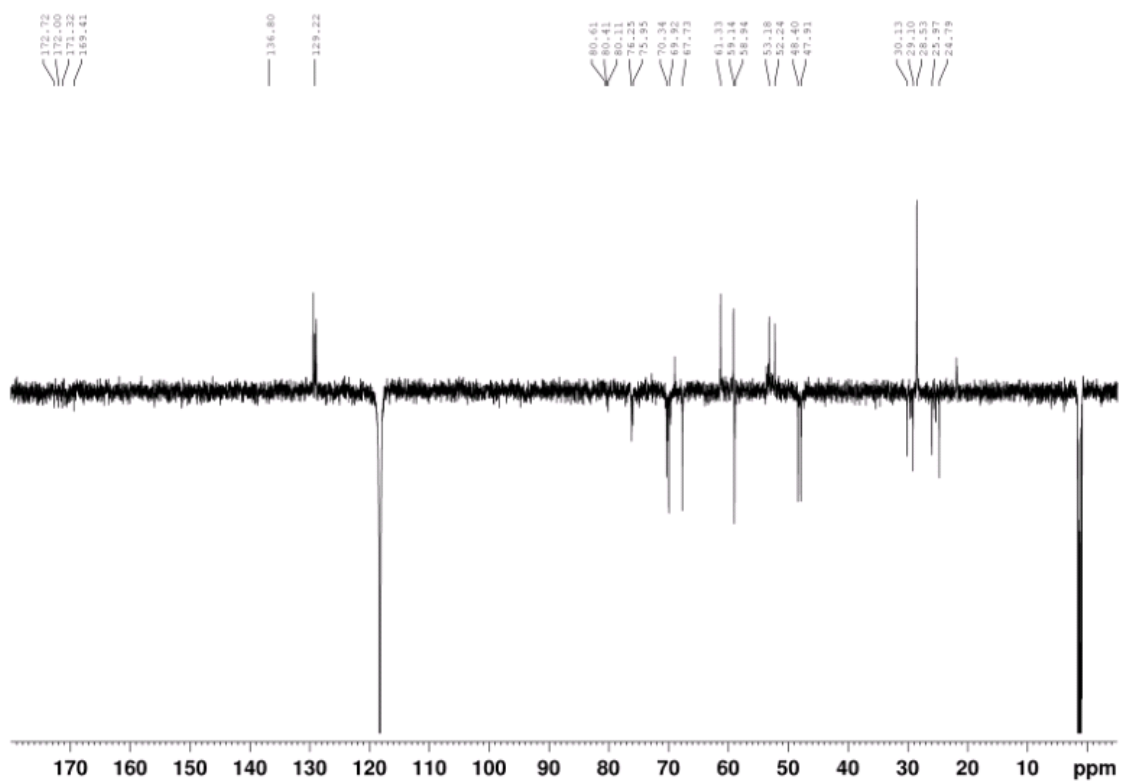

Figure 33: <sup>13</sup>C DEPT 135 spectrum of 13a (176 MHz, CD<sub>3</sub>CN)

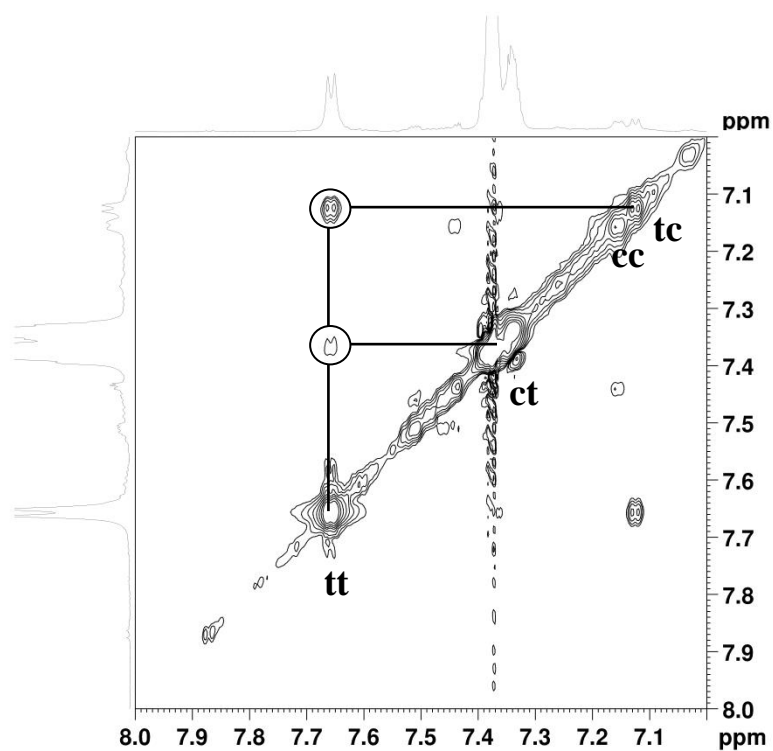

**Figure 33:**  $^1\text{H}$ - $^1\text{H}$  ROESY spectrum of **13a** (700 MHz, 250 ms mixing time,  $\text{CD}_3\text{CN}$ )

The main isomer (*trans-trans*) of **13a** is exchanging slowly on the NMR time scale, as evidenced by the exchange cross peaks in the  $^1\text{H}$ - $^1\text{H}$  ROESY spectrum. A cross peak between e.g. the *trans-trans* isomer and the *cis-cis* isomer is not witnessed due to the low probability of two peptide bonds changing geometry at the same time.



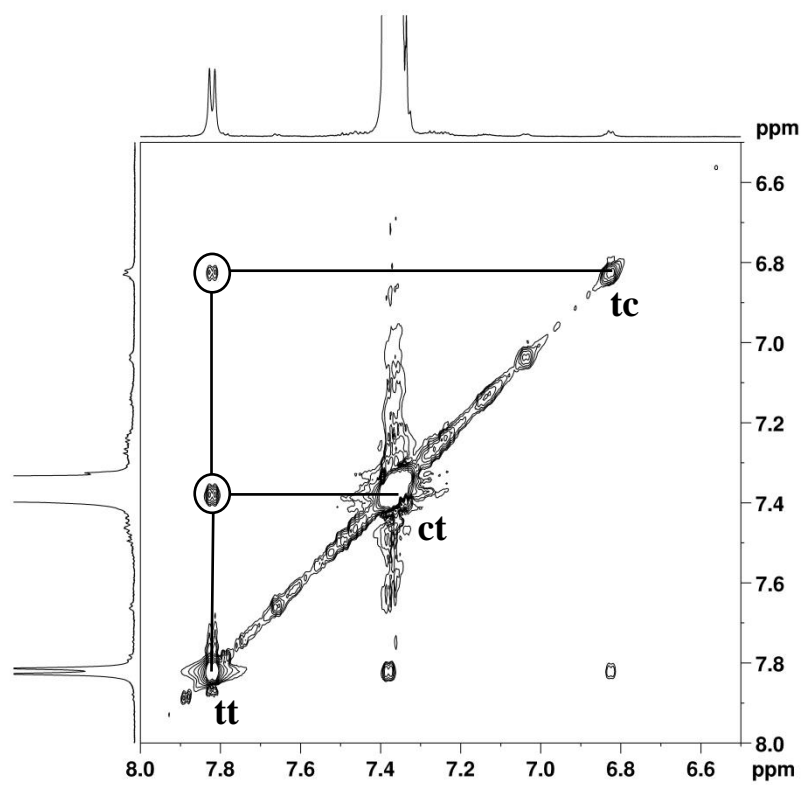

**Figure 36:**  $^1\text{H}$ - $^1\text{H}$  ROESY spectrum of **14a** (700 MHz, 250 ms mixing time,  $\text{CD}_3\text{CN}$ )





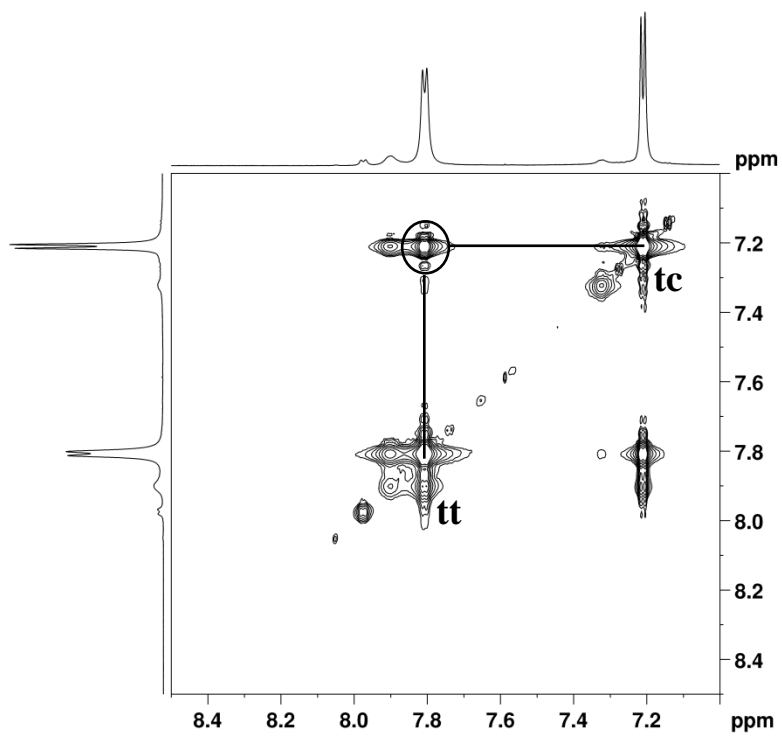

**Figure 39:**  $^1\text{H}$ - $^1\text{H}$  ROESY spectrum of **15a** (700 MHz, 250 ms mixing time,  $\text{CD}_3\text{CN}$ )

**7. Copies of HPLC chromatograms of purified peptides 5a-k, 7 and 9 and crude reaction mixtures of peptides 6a-k, 8 and 10**

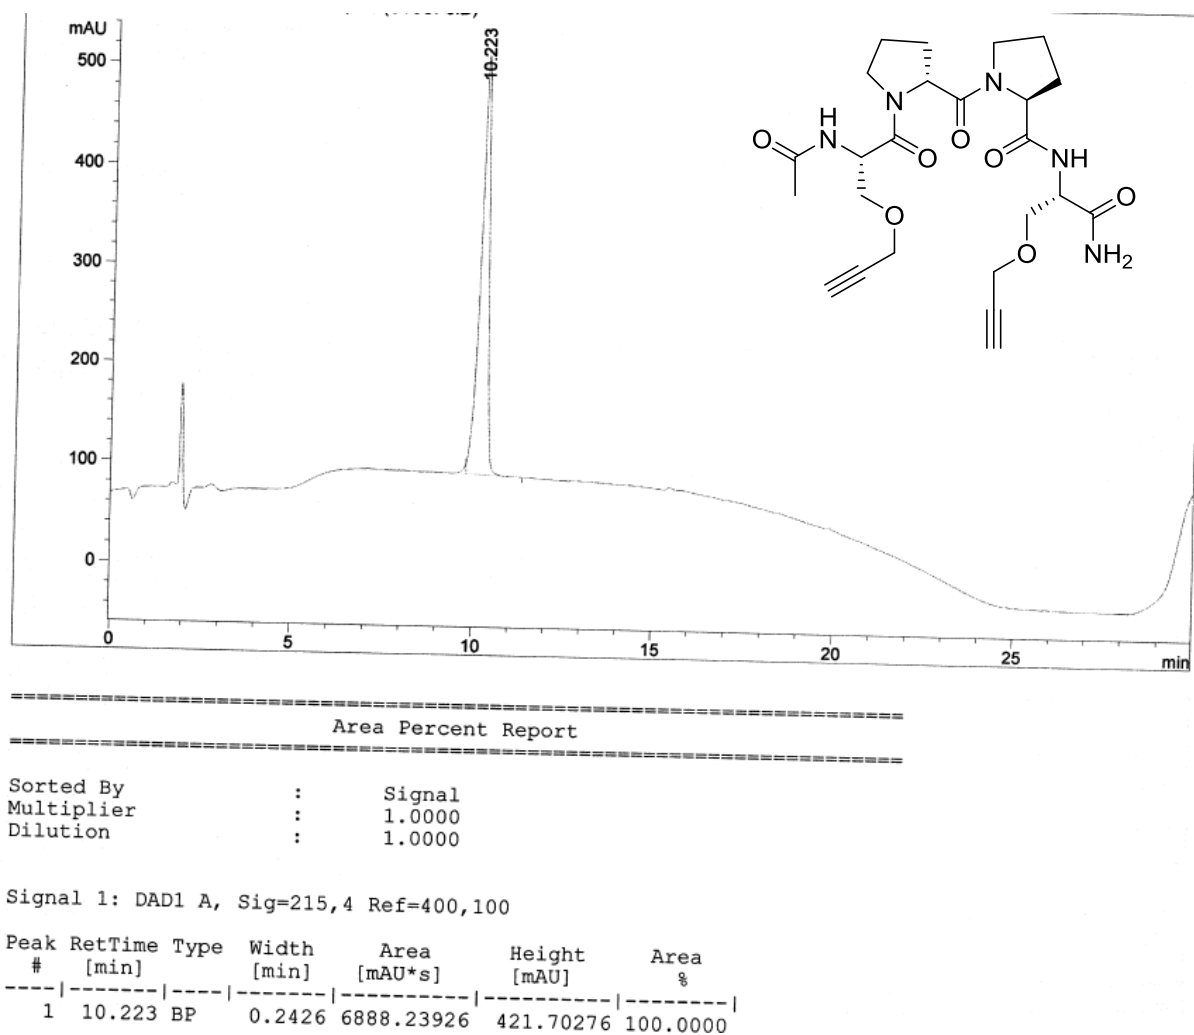

**Figure 40:** HPLC chromatogram of **5a** purified via preparative RP-HPLC.

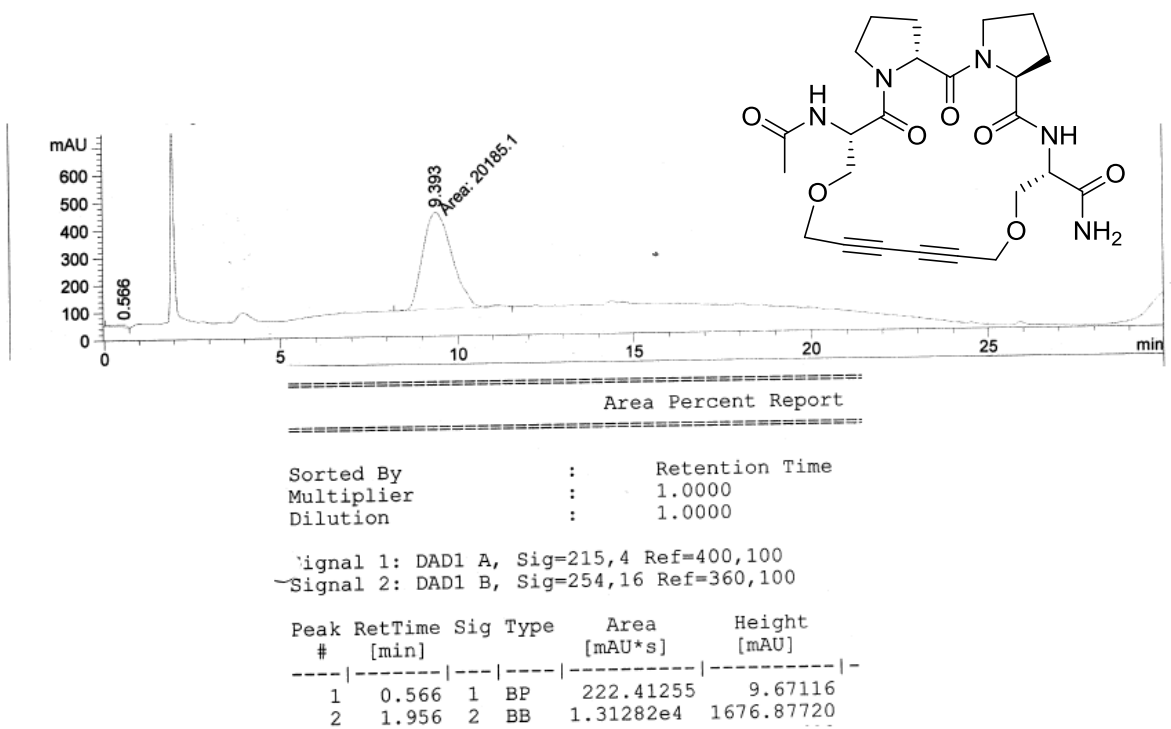

**Figure 41:** HPLC chromatogram of the crude reaction mixture of **6a**.

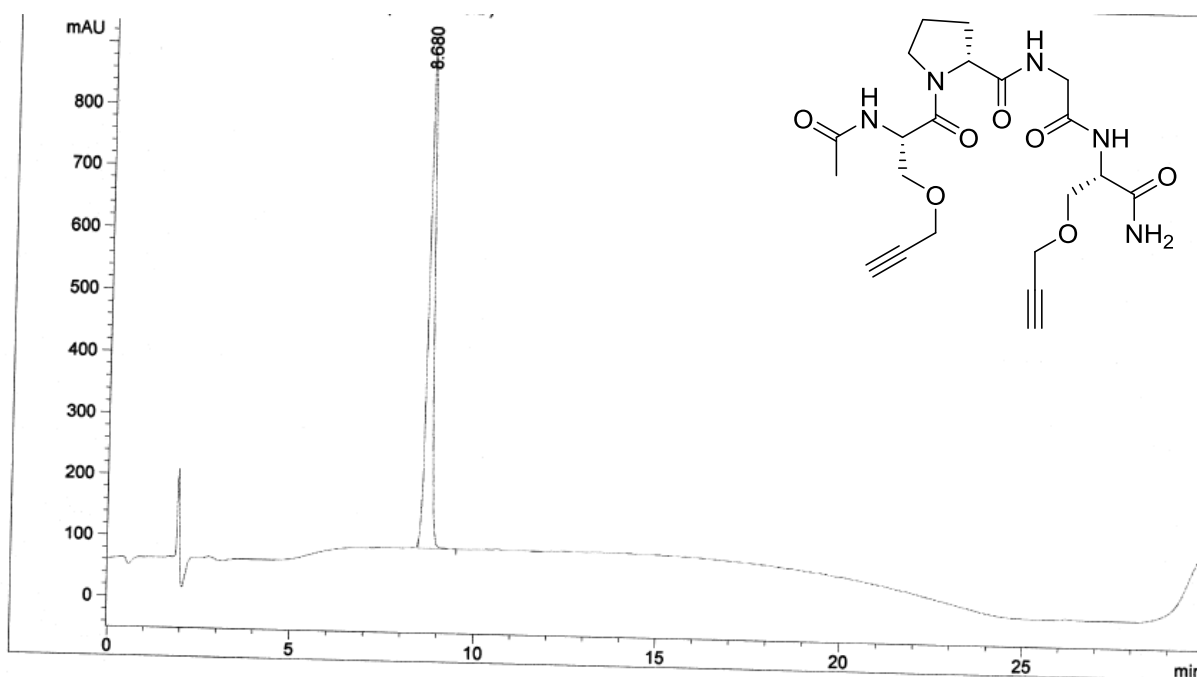

=====  
 Area Percent Report  
 =====

Sorted By : Signal  
 Multiplier : 1.0000  
 Dilution : 1.0000

Signal 1: DAD1 A, Sig=215,4 Ref=400,100

| Peak # | RetTime [min] | Type | Width [min] | Area [mAU*s] | Height [mAU] | Area %   |
|--------|---------------|------|-------------|--------------|--------------|----------|
| 1      | 8.680         | BB   | 0.1629      | 8413.03027   | 798.90167    | 100.0000 |

**Figure 42:** HPLC chromatogram of **5b** purified via preparative RP-HPLC.

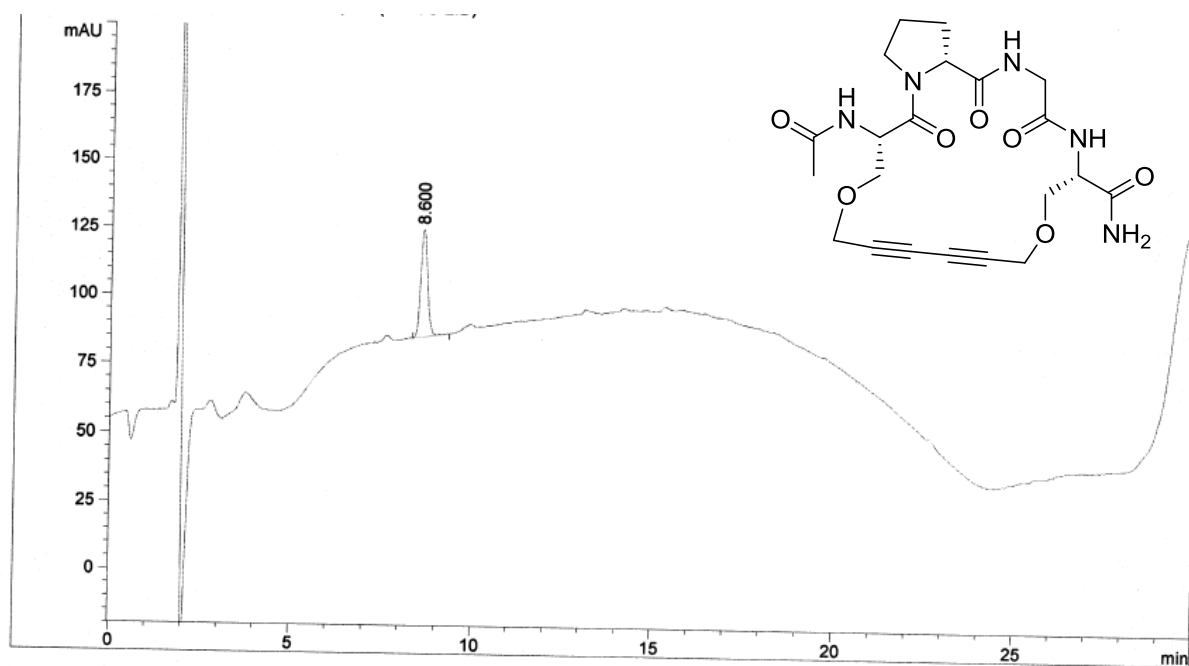

=====  
 Area Percent Report  
 =====

Sorted By : Signal  
 Multiplier : 1.0000  
 Dilution : 1.0000

Signal 1: DAD1 A, Sig=215,4 Ref=400,100

| Peak # | RetTime [min] | Type | Width [min] | Area [mAU*s] | Height [mAU] | Area %   |
|--------|---------------|------|-------------|--------------|--------------|----------|
| 1      | 8.600         | BP   | 0.2101      | 525.68933    | 39.80061     | 100.0000 |

**Figure 43:** HPLC chromatogram of the crude reaction mixture of **6b**.

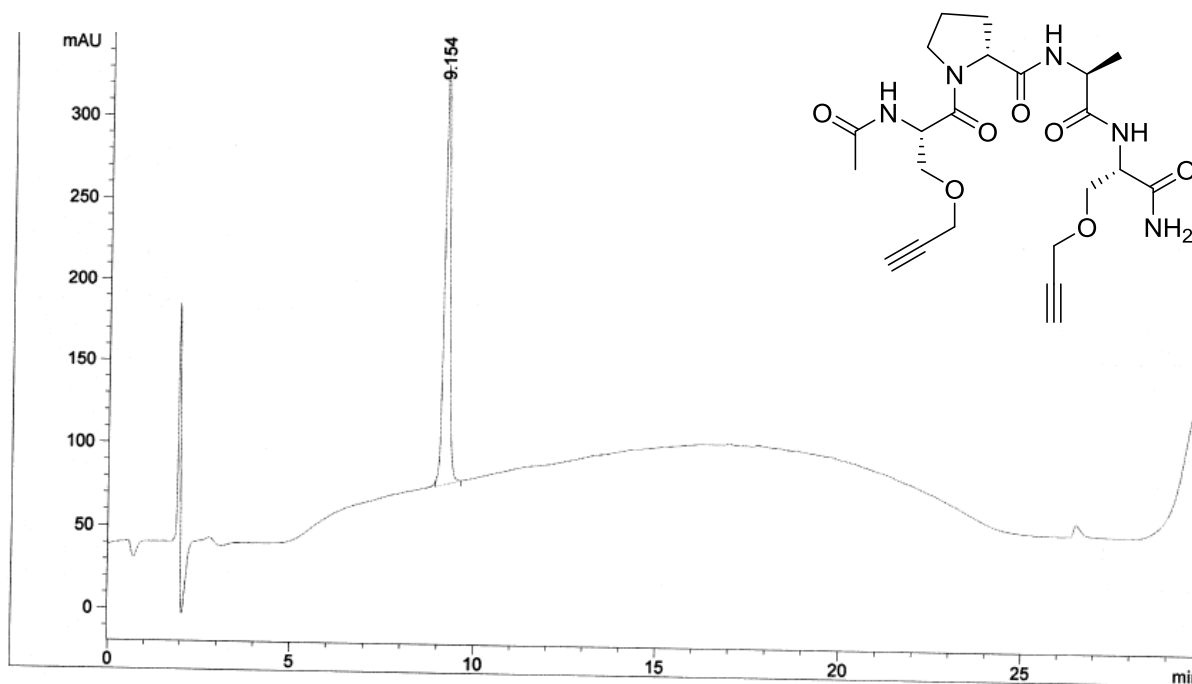

=====  
 Area Percent Report  
 =====

Sorted By : Signal  
 Multiplier : 1.0000  
 Dilution : 1.0000

Signal 1: DAD1 A, Sig=215,4 Ref=400,100

| Peak # | RetTime [min] | Type | Width [min] | Area [mAU*s] | Height [mAU] | Area %   |
|--------|---------------|------|-------------|--------------|--------------|----------|
| 1      | 9.154         | PB   | 0.1564      | 2638.44238   | 255.59734    | 100.0000 |

**Figure 44:** HPLC chromatogram of **5c** purified via preparative RP-HPLC.

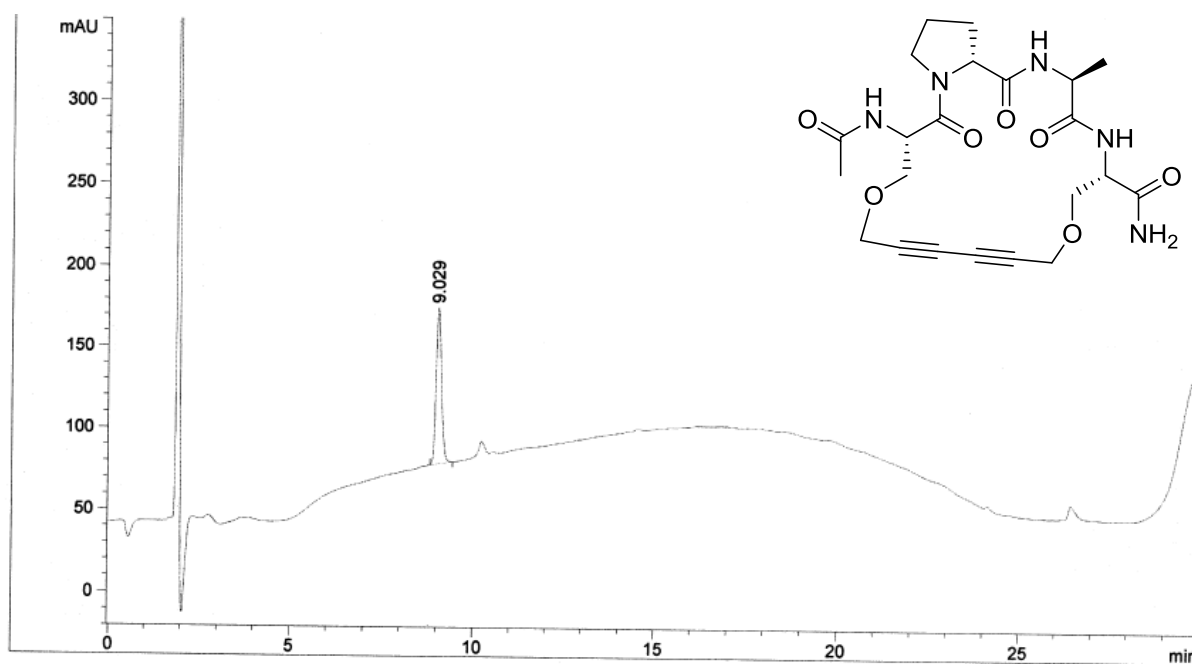

=====  
 Area Percent Report  
 =====

Sorted By : Signal  
 Multiplier : 1.0000  
 Dilution : 1.0000

Signal 1: DAD1 A, Sig=215,4 Ref=400,100

| Peak # | RetTime [min] | Type | Width [min] | Area [mAU*s] | Height [mAU] | Area %   |
|--------|---------------|------|-------------|--------------|--------------|----------|
| 1      | 9.029         | BP   | 0.1738      | 1106.80615   | 96.47875     | 100.0000 |

**Figure 45:** HPLC chromatogram of the crude reaction mixture of **6c**.



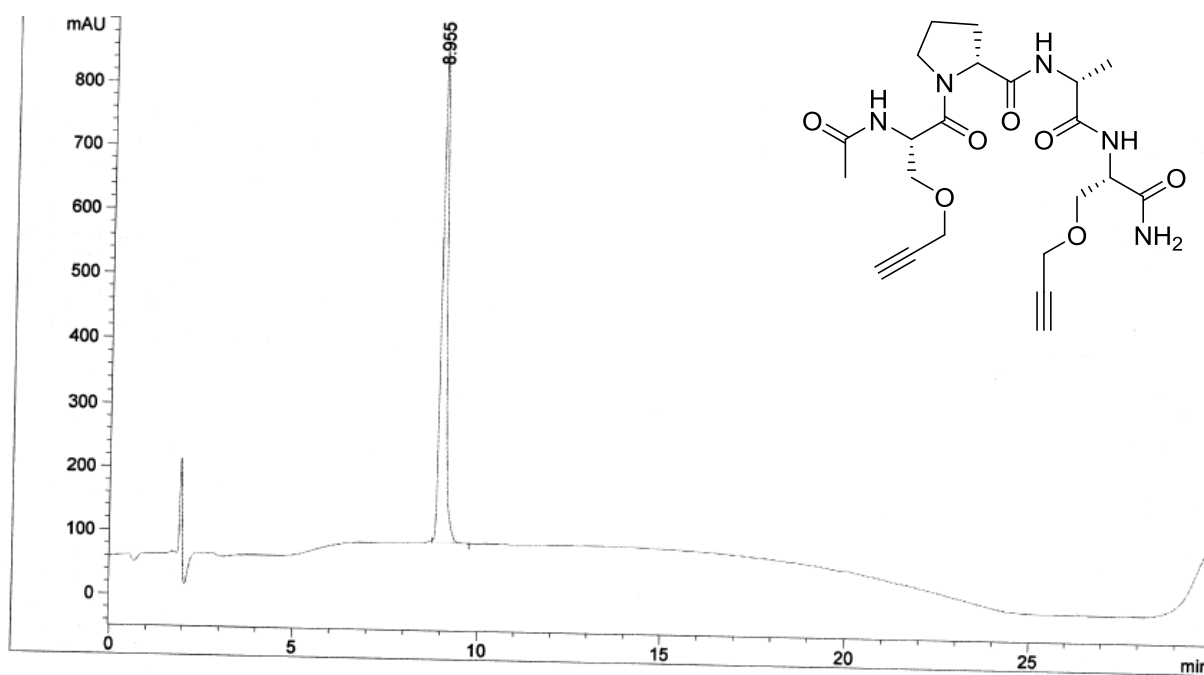

=====  
 Area Percent Report  
 =====

Sorted By : Signal  
 Multiplier : 1.0000  
 Dilution : 1.0000

Signal 1: DAD1 A, Sig=215,4 Ref=400,100

| Peak # | RetTime [min] | Type | Width [min] | Area [mAU*s] | Height [mAU] | Area %   |
|--------|---------------|------|-------------|--------------|--------------|----------|
| 1      | 8.955         | BP   | 0.1587      | 7848.36719   | 771.18408    | 100.0000 |

**Figure 46:** HPLC chromatogram of **5d** purified via preparative RP-HPLC.

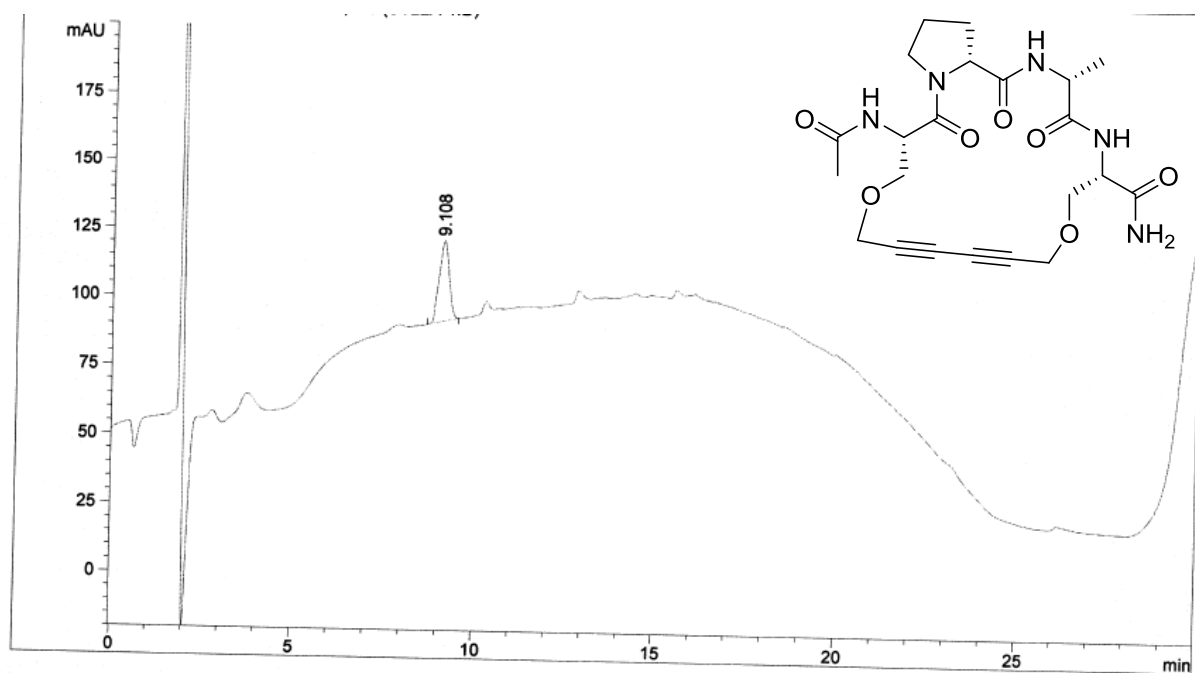

=====  
 Area Percent Report  
 =====

Sorted By : Signal  
 Multiplier : 1.0000  
 Dilution : 1.0000

Signal 1: DAD1 A, Sig=215,4 Ref=400,100

| Peak # | RetTime [min] | Type | Width [min] | Area [mAU*s] | Height [mAU] | Area %   |
|--------|---------------|------|-------------|--------------|--------------|----------|
| 1      | 9.108         | PP   | 0.2881      | 556.07678    | 29.47807     | 100.0000 |

**Figure 47:** HPLC chromatogram of the crude reaction mixture of **6d**.

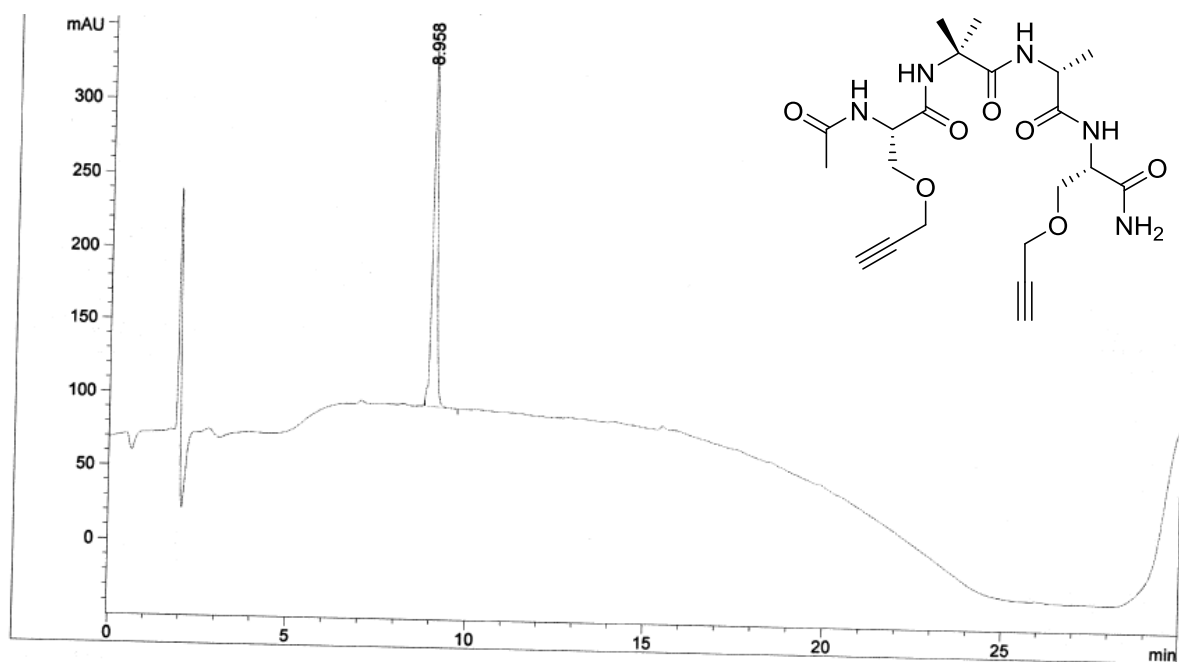

=====  
 Area Percent Report  
 =====

Sorted By : Signal  
 Multiplier : 1.0000  
 Dilution : 1.0000

Signal 1: DAD1 A, Sig=215,4 Ref=400,100

| Peak # | RetTime [min] | Type | Width [min] | Area [mAU*s] | Height [mAU] | Area %   |
|--------|---------------|------|-------------|--------------|--------------|----------|
| 1      | 8.958         | BP   | 0.1400      | 2209.20557   | 243.20943    | 100.0000 |

**Figure 48:** HPLC chromatogram of **5e** purified via preparative RP-HPLC.

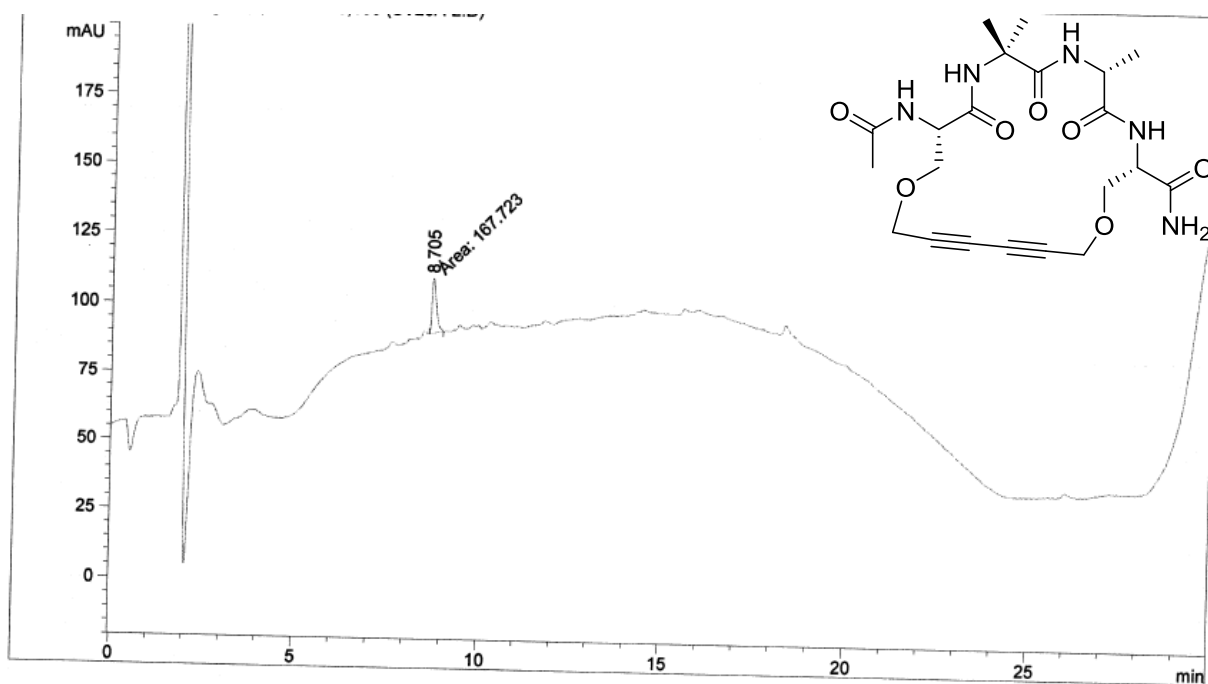

=====  
 Area Percent Report  
 =====

Sorted By : Signal  
 Multiplier : 1.0000  
 Dilution : 1.0000

Signal 1: DAD1 A, Sig=215,4 Ref=400,100

| Peak # | RetTime [min] | Type | Width [min] | Area [mAU*s] | Height [mAU] | Area %   |
|--------|---------------|------|-------------|--------------|--------------|----------|
| 1      | 8.705         | MM   | 0.1418      | 167.72296    | 19.71524     | 100.0000 |

**Figure 49:** HPLC chromatogram of the crude reaction mixture of **6e**.

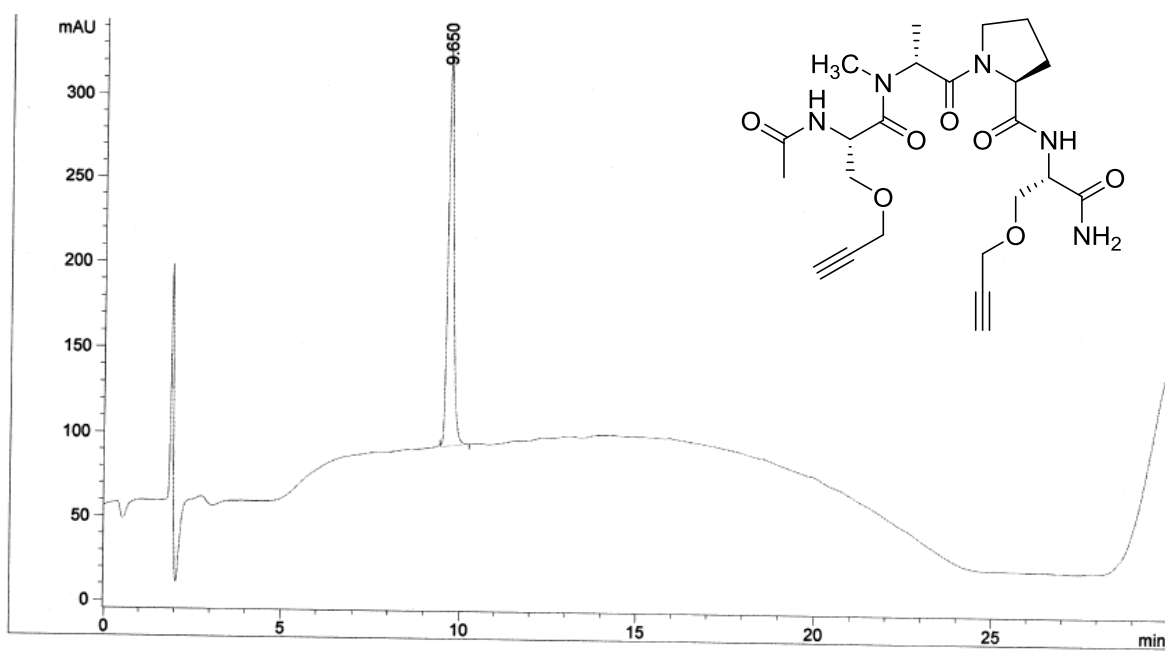

=====  
 Area Percent Report  
 =====

Sorted By : Signal  
 Multiplier : 1.0000  
 Dilution : 1.0000

Signal 1: DAD1 A, Sig=215,4 Ref=400,100

| Peak # | RetTime [min] | Type | Width [min] | Area [mAU*s] | Height [mAU] | Area %   |
|--------|---------------|------|-------------|--------------|--------------|----------|
| 1      | 9.650         | BB   | 0.1656      | 2518.04663   | 233.90530    | 100.0000 |

**Figure 50:** HPLC chromatogram of **5f** purified via preparative RP-HPLC.

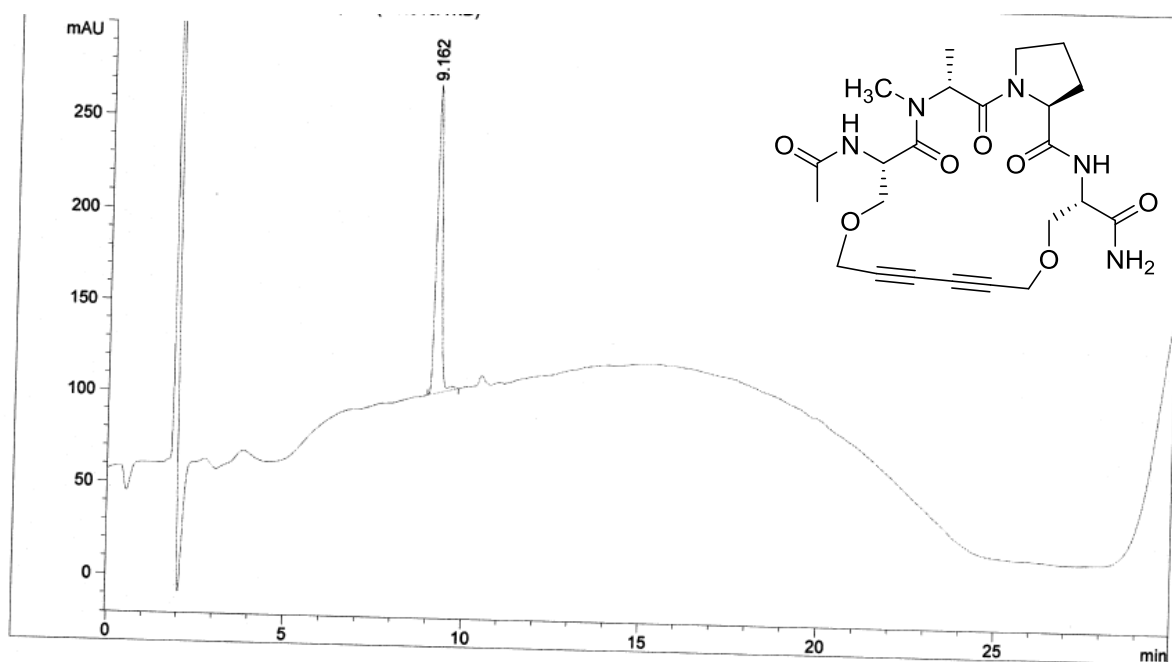

=====  
 Area Percent Report  
 =====

Sorted By : Signal  
 Multiplier : 1.0000  
 Dilution : 1.0000

Signal 1: DAD1 A, Sig=215,4 Ref=400,100

| Peak # | RetTime [min] | Type | Width [min] | Area [mAU*s] | Height [mAU] | Area %   |
|--------|---------------|------|-------------|--------------|--------------|----------|
| 1      | 9.162         | BP   | 0.1654      | 1796.84961   | 167.15628    | 100.0000 |

**Figure 51:** HPLC chromatogram of the crude reaction mixture of **6f**.

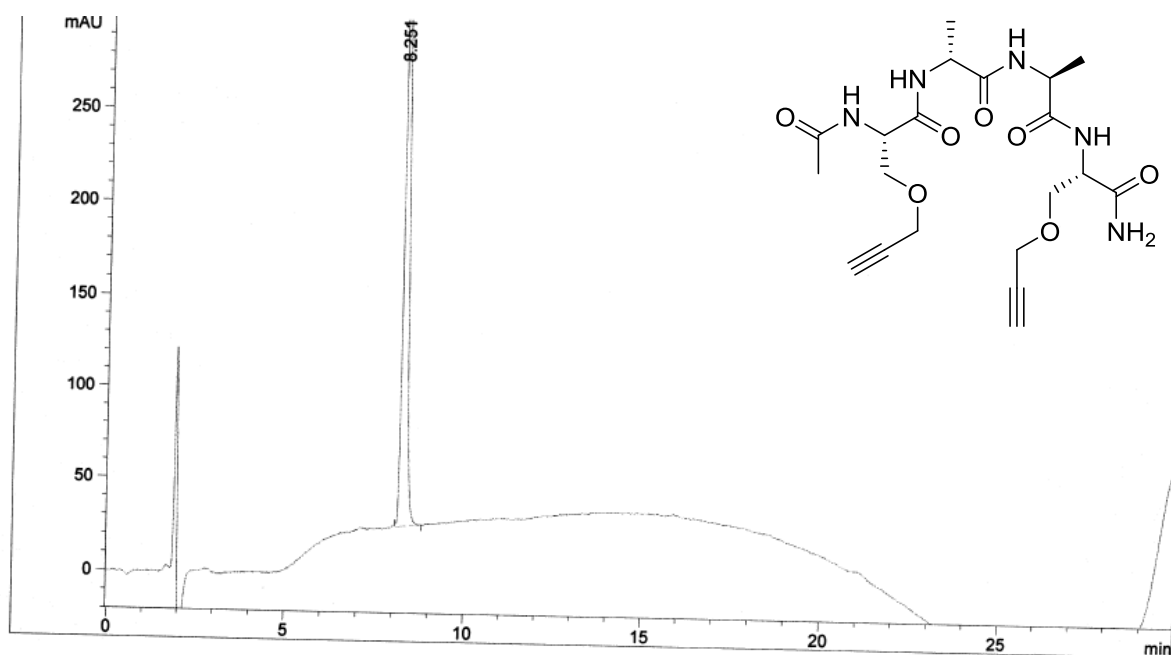

=====  
 Area Percent Report  
 =====

Sorted By : Signal  
 Multiplier : 1.0000  
 Dilution : 1.0000

Signal 1: DAD1 A, Sig=215,4 Ref=400,100

| Peak # | RetTime [min] | Type | Width [min] | Area [mAU*s] | Height [mAU] | Area %   |
|--------|---------------|------|-------------|--------------|--------------|----------|
| 1      | 8.251         | BP   | 0.1478      | 3263.34644   | 346.68845    | 100.0000 |

**Figure 52:** HPLC chromatogram of **5g** purified via preparative RP-HPLC.

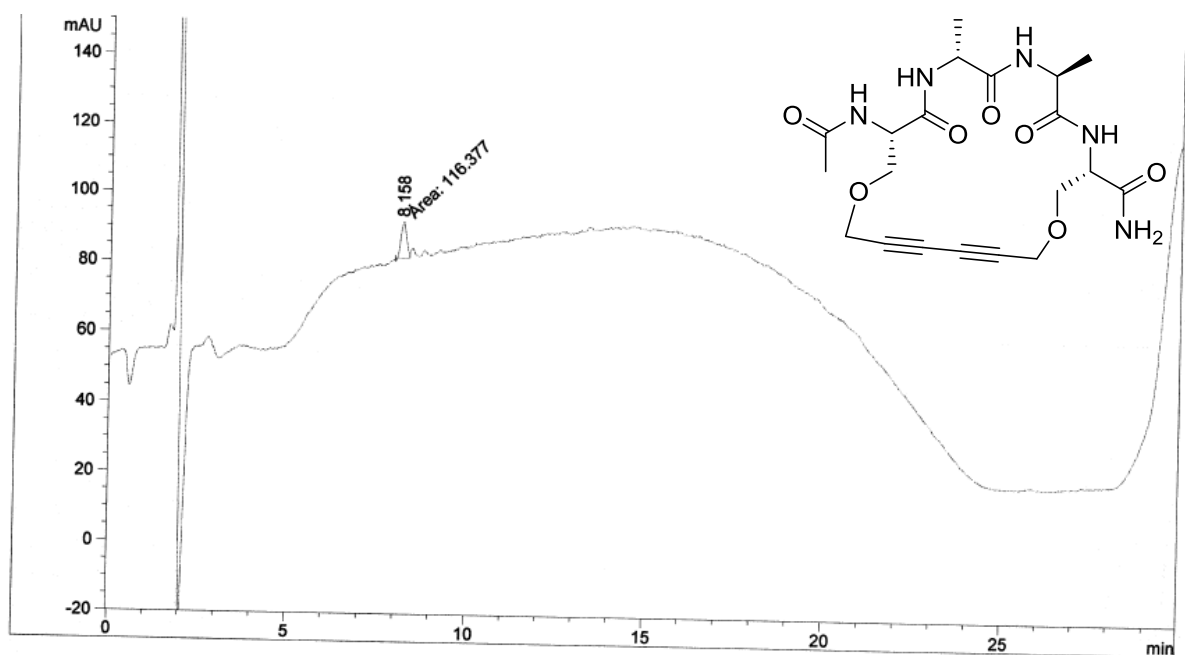

=====  
 Area Percent Report  
 =====

Sorted By : Signal  
 Multiplier : 1.0000  
 Dilution : 1.0000

Signal 1: DAD1 A, Sig=215,4 Ref=400,100

| Peak # | RetTime [min] | Type | Width [min] | Area [mAU*s] | Height [mAU] | Area %   |
|--------|---------------|------|-------------|--------------|--------------|----------|
| 1      | 8.116         | Fsho | 0.0000      | 0.00000      | 8.82814      | 0.0000   |
| 2      | 8.158         | MM   | 0.1843      | 116.37746    | 10.52448     | 100.0000 |

**Figure 53:** HPLC chromatogram of the crude reaction mixture of **6g**.



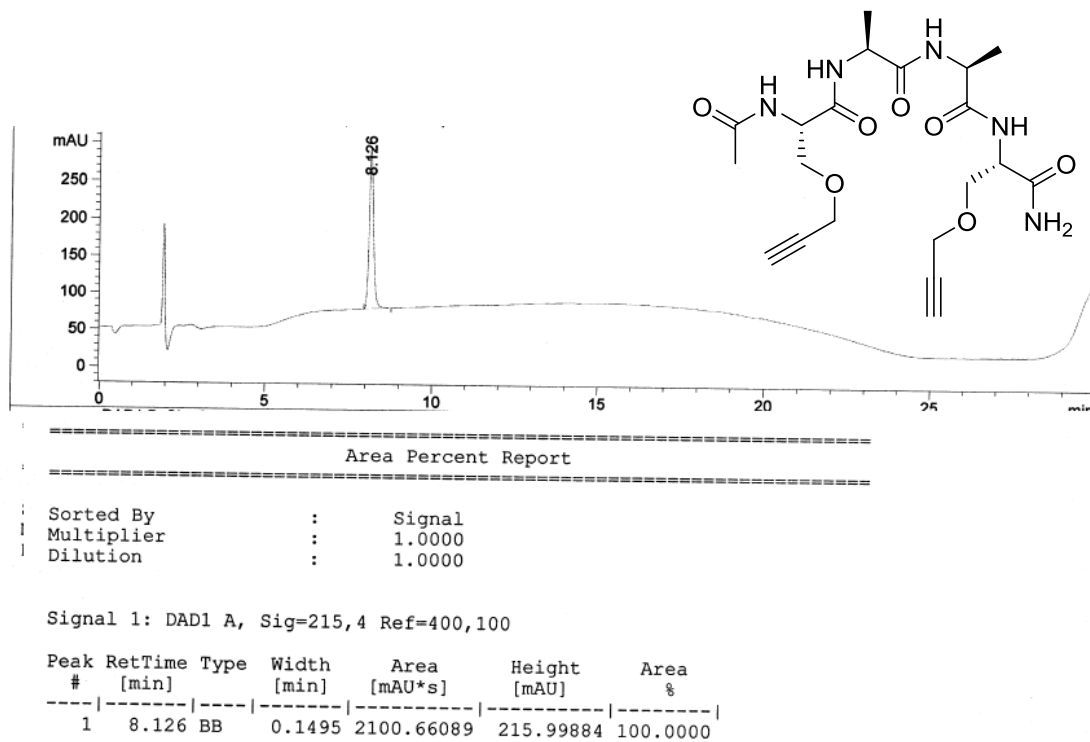

**Figure 54:** HPLC chromatogram of **5h** purified via preparative RP-HPLC.

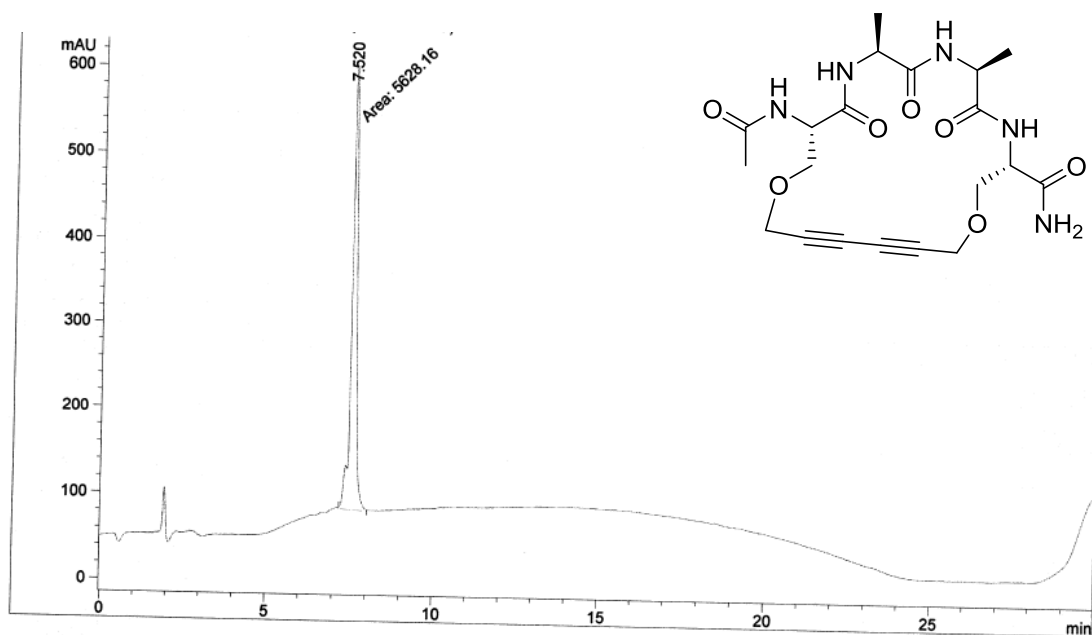

=====  
 Area Percent Report  
 =====

Sorted By : Signal  
 Multiplier : 1.0000  
 Dilution : 1.0000

Signal 1: DAD1 A, Sig=215,4 Ref=400,100

| Peak # | RetTime [min] | Type | Width [min] | Area [mAU*s] | Height [mAU] | Area %   |
|--------|---------------|------|-------------|--------------|--------------|----------|
| 1      | 7.520         | MM   | 0.1810      | 5628.16309   | 518.11969    | 100.0000 |
| 2      | 7.953         | Rsho | 0.0000      | 0.00000      | 4.87684      | 0.0000   |

**Figure 55:** HPLC chromatogram of the crude reaction mixture of **6h**.

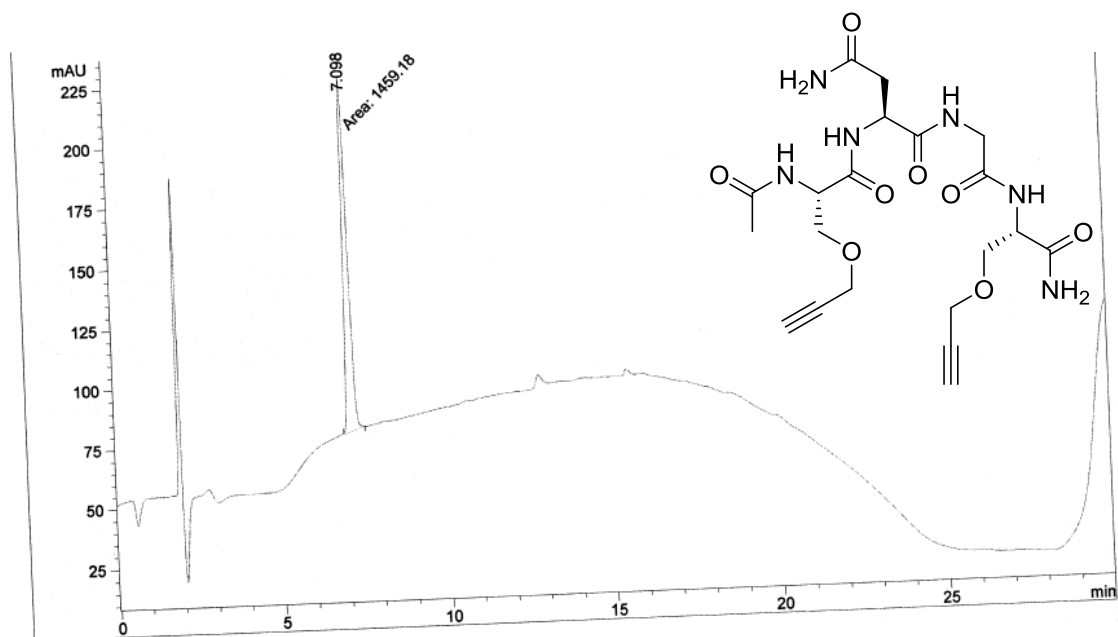

=====  
 Area Percent Report  
 =====

Sorted By : Signal  
 Multiplier : 1.0000  
 Dilution : 1.0000

Signal 1: DAD1 A, Sig=215,4 Ref=400,100

| Peak # | RetTime [min] | Type | Width [min] | Area [mAU*s] | Height [mAU] | Area %   |
|--------|---------------|------|-------------|--------------|--------------|----------|
| 1      | 7.098         | MM   | 0.1645      | 1459.18115   | 147.87390    | 100.0000 |
| 2      | 7.465         | Rsho | 0.0000      | 0.00000      | 2.73038      | 0.0000   |

**Figure 56:** HPLC chromatogram of **5i** purified via preparative RP-HPLC.

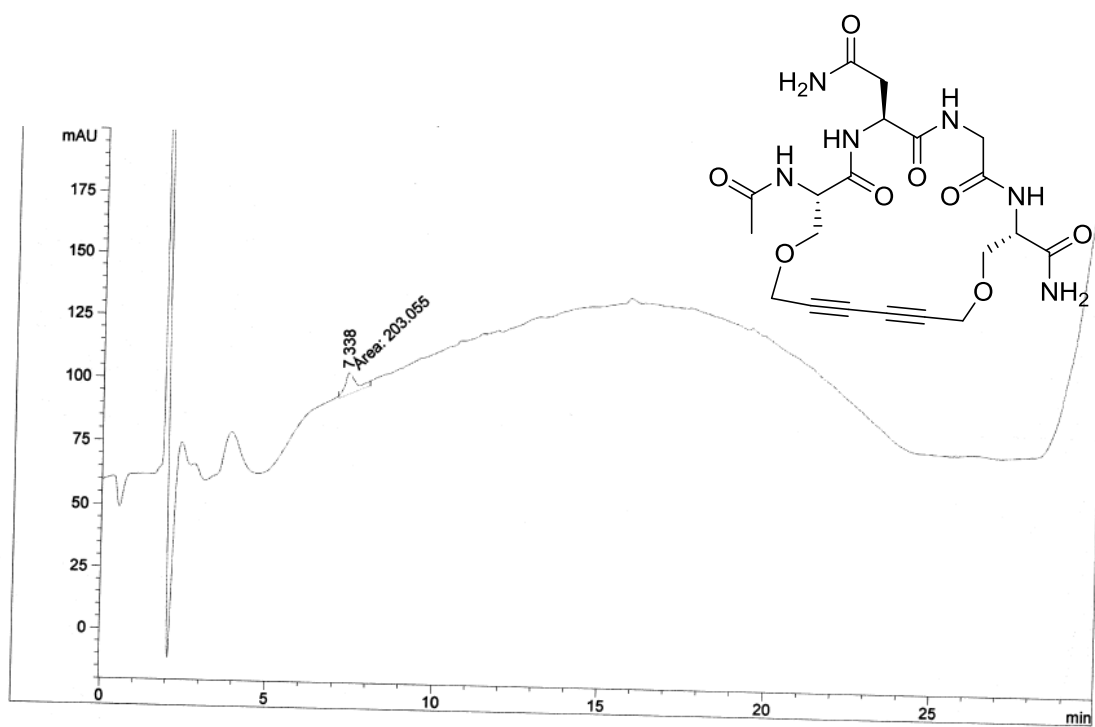

=====  
 Area Percent Report  
 =====

Sorted By : Signal  
 Multiplier : 1.0000  
 Dilution : 1.0000

Signal 1: DAD1 A, Sig=215,4 Ref=400,100

| Peak # | RetTime [min] | Type | Width [min] | Area [mAU*s] | Height [mAU] | Area %   |
|--------|---------------|------|-------------|--------------|--------------|----------|
| 1      | 7.161         | Fsho | 0.0000      | 0.00000      | 2.04270      | 0.0000   |
| 2      | 7.338         | MM   | 0.3952      | 203.05481    | 8.56279      | 100.0000 |

**Figure 57:** HPLC chromatogram of the crude reaction mixture of **6i**.

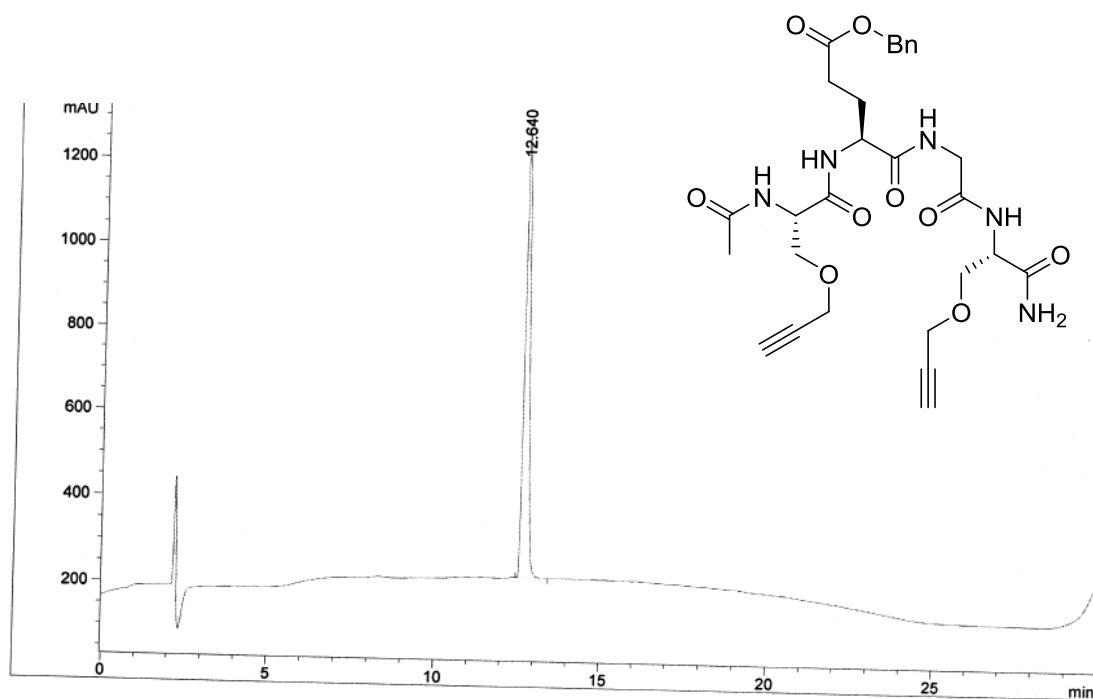

=====  
 Area Percent Report  
 =====

Sorted By : Signal  
 Multiplier : 1.0000  
 Dilution : 1.0000

Signal 1: DAD1 A, Sig=215,4 Ref=400,100

| Peak # | RetTime [min] | Type | Width [min] | Area [mAU*s] | Height [mAU] | Area %   |
|--------|---------------|------|-------------|--------------|--------------|----------|
| 1      | 12.640        | BP   | 0.1680      | 1.10882e4    | 1043.47583   | 100.0000 |

**Figure 58:** HPLC chromatogram of **5j** purified via preparative RP-HPLC.

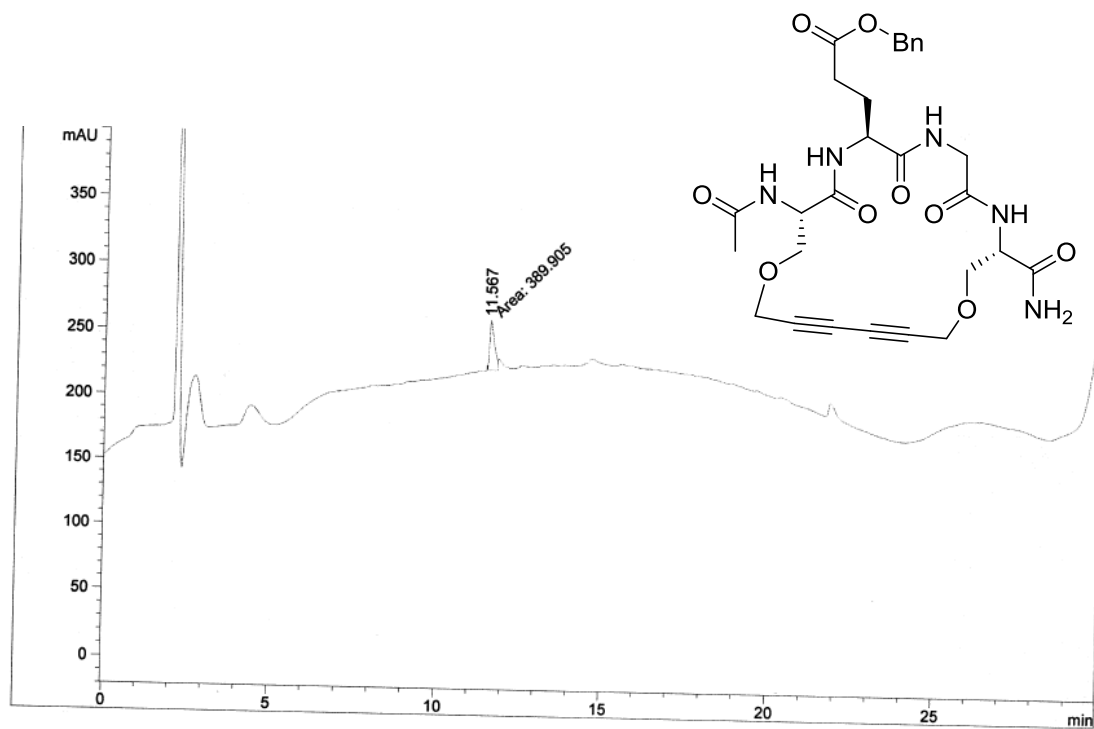

=====  
 Area Percent Report  
 =====

Sorted By : Signal  
 Multiplier : 1.0000  
 Dilution : 1.0000

Signal 1: DAD1 A, Sig=215,4 Ref=400,100

| Peak # | RetTime [min] | Type | Width [min] | Area [mAU*s] | Height [mAU] | Area %   |
|--------|---------------|------|-------------|--------------|--------------|----------|
| 1      | 11.567        | MM   | 0.1710      | 389.90521    | 38.01034     | 100.0000 |
| 2      | 11.716        | Rsho | 0.0000      | 0.00000      | 14.19488     | 0.0000   |

**Figure 59:** HPLC chromatogram of the crude reaction mixture of **6j**.

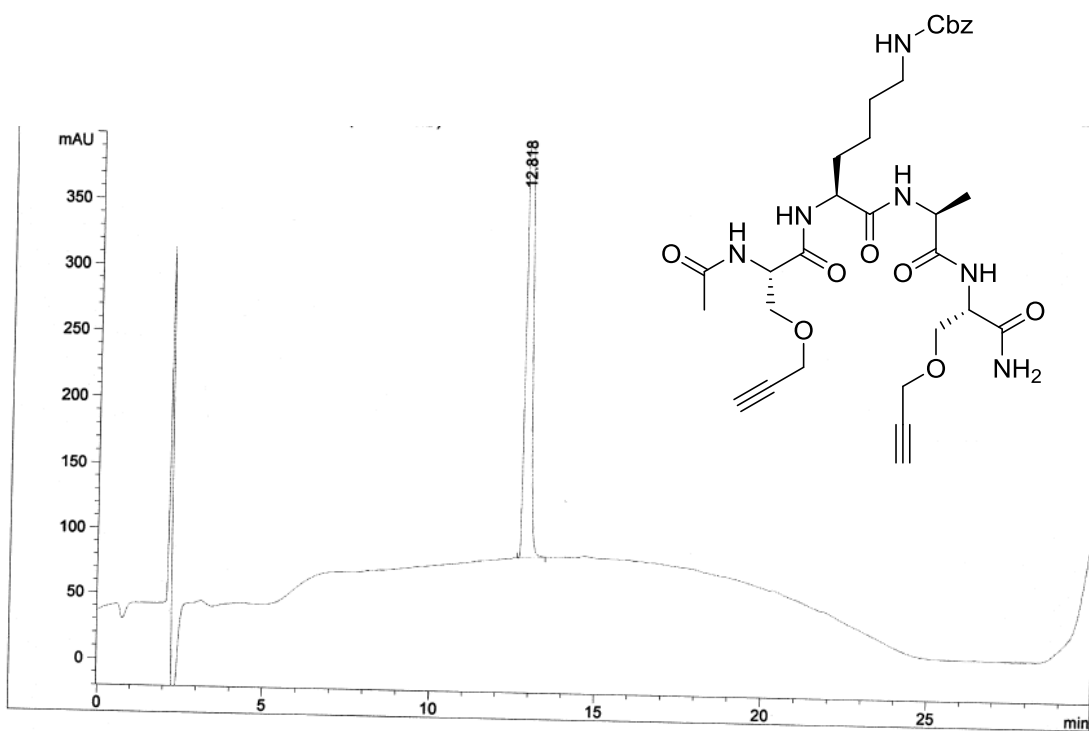

=====  
 Area Percent Report  
 =====

Sorted By : Signal  
 Multiplier : 1.0000  
 Dilution : 1.0000

Signal 1: DAD1 A, Sig=215,4 Ref=400,100

| Peak # | RetTime [min] | Type | Width [min] | Area [mAU*s] | Height [mAU] | Area %   |
|--------|---------------|------|-------------|--------------|--------------|----------|
| 1      | 12.818        | BB   | 0.1627      | 5832.69434   | 554.40863    | 100.0000 |

**Figure 60:** HPLC chromatogram of **5k** purified via preparative RP-HPLC.

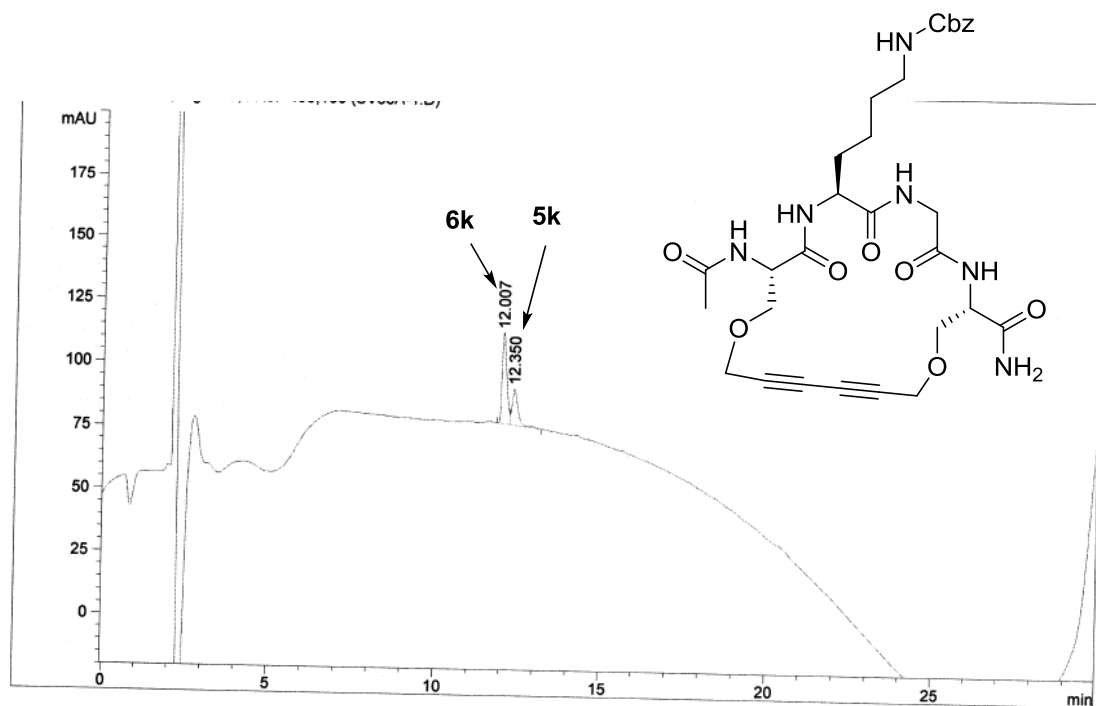

=====  
 Area Percent Report  
 =====

Sorted By : Signal  
 Multiplier : 1.0000  
 Dilution : 1.0000

Signal 1: DAD1 A, Sig=215,4 Ref=400,100

| Peak # | RetTime [min] | Type | Width [min] | Area [mAU*s] | Height [mAU] | Area %  |
|--------|---------------|------|-------------|--------------|--------------|---------|
| 1      | 12.007        | PV   | 0.1554      | 351.28323    | 35.51619     | 66.9451 |
| 2      | 12.350        | VB   | 0.1868      | 173.44995    | 14.16775     | 33.0549 |

**Figure 61:** HPLC chromatogram of the crude reaction mixture of **6k**.



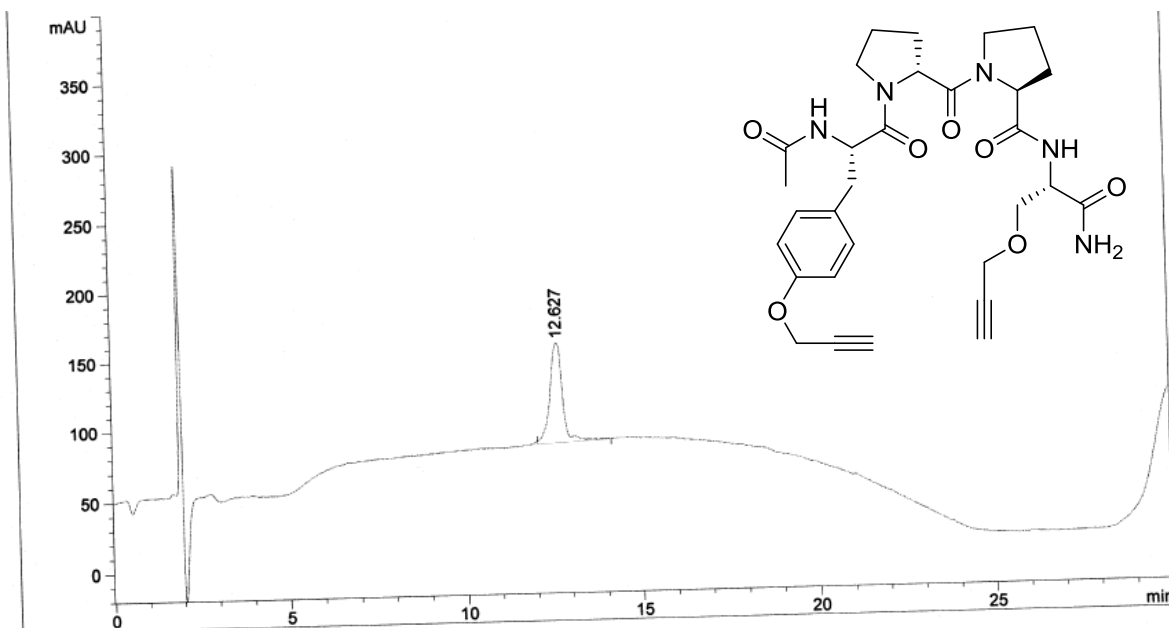

=====  
 Area Percent Report  
 =====

Sorted By : Signal  
 Multiplier : 1.0000  
 Dilution : 1.0000

Signal 1: DAD1 A, Sig=215,4 Ref=400,100

| Peak # | RetTime [min] | Type | Width [min] | Area [mAU*s] | Height [mAU] | Area %   |
|--------|---------------|------|-------------|--------------|--------------|----------|
| 1      | 12.627        | BP   | 0.3803      | 1808.35681   | 72.16608     | 100.0000 |

**Figure 64:** HPLC chromatogram of **7** purified via preparative RP-HPLC.

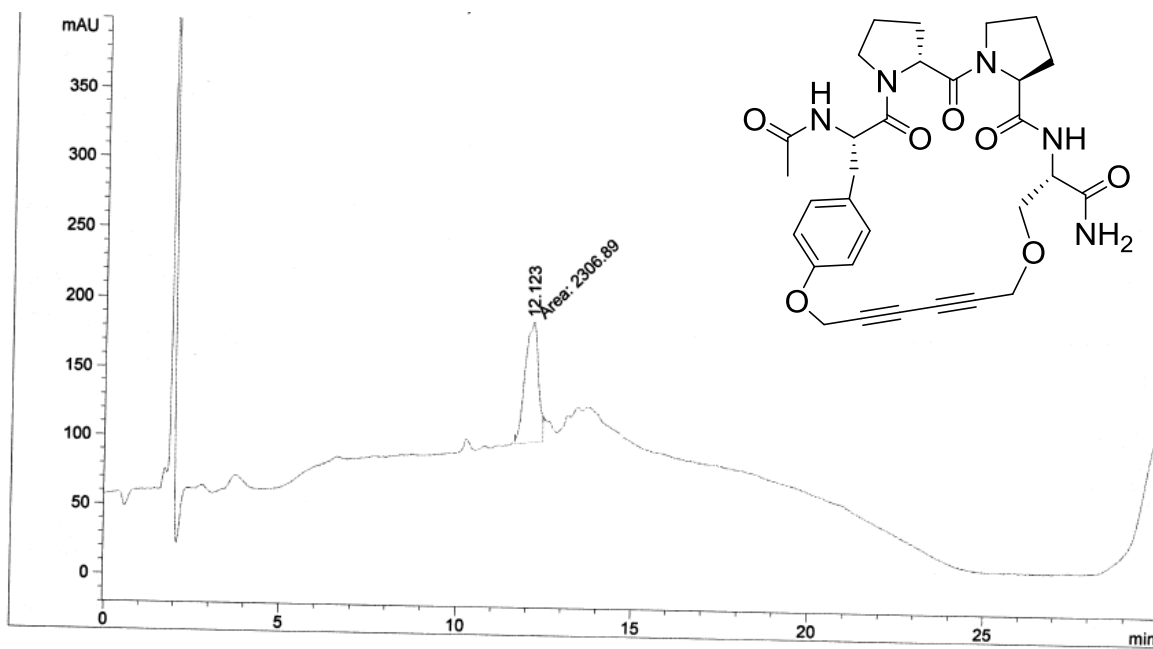

=====  
 Area Percent Report  
 =====

Sorted By : Signal  
 Multiplier : 1.0000  
 Dilution : 1.0000

Signal 1: DAD1 A, Sig=215,4 Ref=400,100

| Peak # | RetTime [min] | Type | Width [min] | Area [mAU*s] | Height [mAU] | Area %   |
|--------|---------------|------|-------------|--------------|--------------|----------|
| 1      | 11.901        | Fsho | 0.0000      | 0.00000      | 59.58928     | 0.0000   |
| 2      | 12.123        | MM   | 0.4385      | 2306.89209   | 87.67314     | 100.0000 |

**Figure 65:** HPLC chromatogram of the crude reaction mixture of **8**.

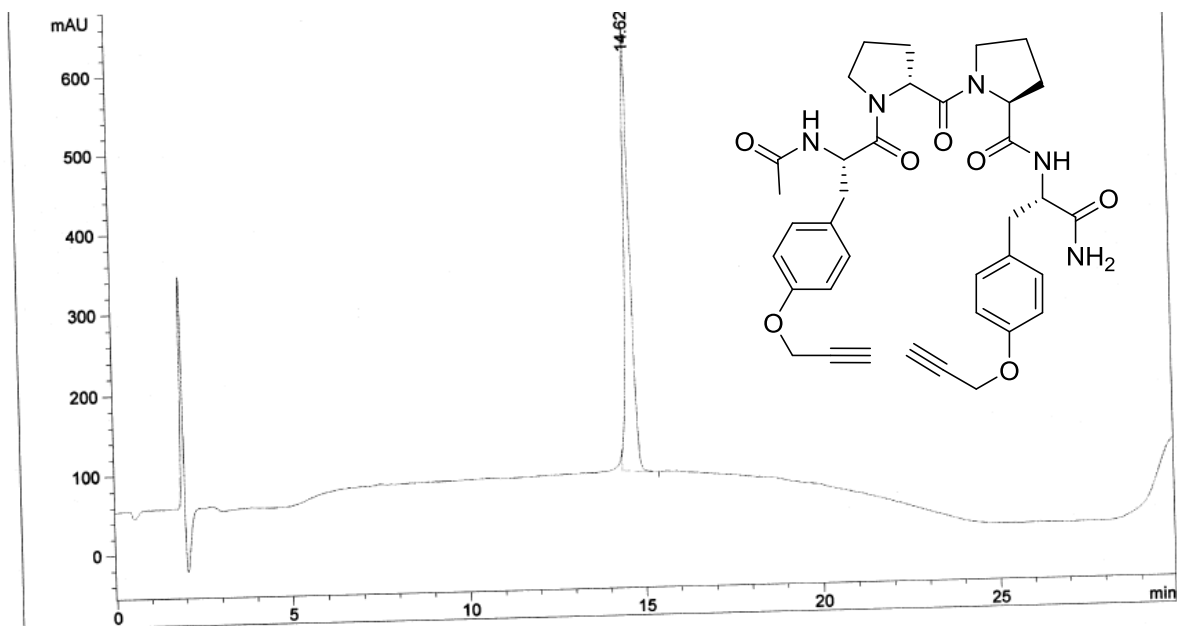

=====  
 Area Percent Report  
 =====

Sorted By : Signal  
 Multiplier : 1.0000  
 Dilution : 1.0000

Signal 1: DAD1 A, Sig=215,4 Ref=400,100

| Peak # | RetTime [min] | Type | Width [min] | Area [mAU*s] | Height [mAU] | Area %   |
|--------|---------------|------|-------------|--------------|--------------|----------|
| 1      | 14.629        | BP   | 0.1724      | 6683.43848   | 555.22015    | 100.0000 |

**Figure 62:** HPLC chromatogram of **9** purified via preparative RP-HPLC.

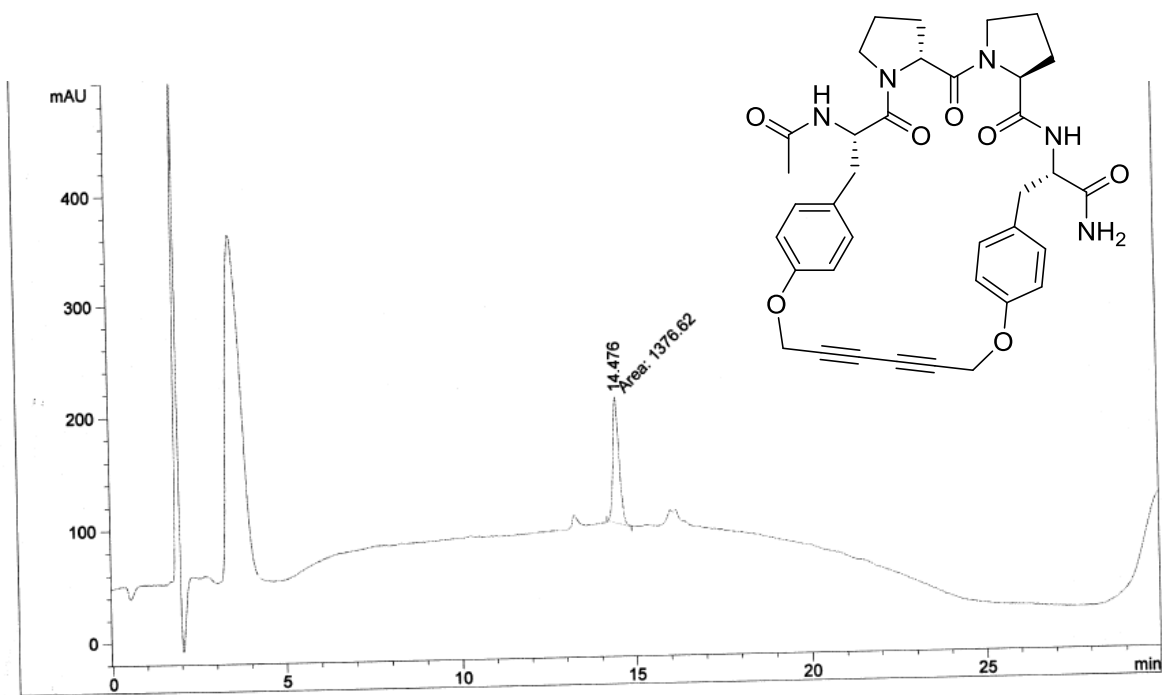

=====  
 Area Percent Report  
 =====

Sorted By : Signal  
 Multiplier : 1.0000  
 Dilution : 1.0000

Signal 1: DAD1 A, Sig=215,4 Ref=400,100

| Peak # | RetTime [min] | Type | Width [min] | Area [mAU*s] | Height [mAU] | Area %   |
|--------|---------------|------|-------------|--------------|--------------|----------|
| 1      | 14.476        | MM   | 0.2046      | 1376.61584   | 112.15251    | 100.0000 |
| 2      | 14.774        | Rsho | 0.0000      | 0.00000      | 6.88563      | 0.0000   |

**Figure 63:** HPLC chromatogram of the crude reaction mixture of **10**.

## 8. References

---

- <sup>1</sup> A. M. King, C. Salomé, J. Dinsmore, E. Salomé-Grosjean, M. De Ryck, R. Kaminiski, A. Valade, H. Kohn, *J. Med. Chem.*, 2011, **54**, 4815.
- <sup>2</sup> H. T. ten Brink, D. T. S. Rijkers, R. M. J. Liskamp, *J. Org. Chem.* 2006, **71**, 1817.
- <sup>3</sup> S. Reitz, M. Cebi, P. Reiß, G. Studnik, U. Linne, U. Koert, L.-O. Essen, *Angew. Chem. Int. Ed.*, 2009, **48**, 4853.
- <sup>4</sup> C. Li, J. Tang, J. Xie, *Tetrahedron*, 2009, **65**, 7935.
- <sup>5</sup> C. Reuter, P. Huy, J.-M. Neudörfl, R. Kühne, H.-G. Schmalz, *Chem. Eur. J.*, 2011, **17**, 12037.
